# Supplementary material for: Minimally invasive classification of pediatric solid tumors using reduced representation bisulfite sequencing of cell-free DNA: a proof-of-principle study
Source: bioRxiv or medRxiv preprint supplement (doi:10.1101/795047), 2020-03-02
Supplement: Supplementary file [file media-1.pdf]

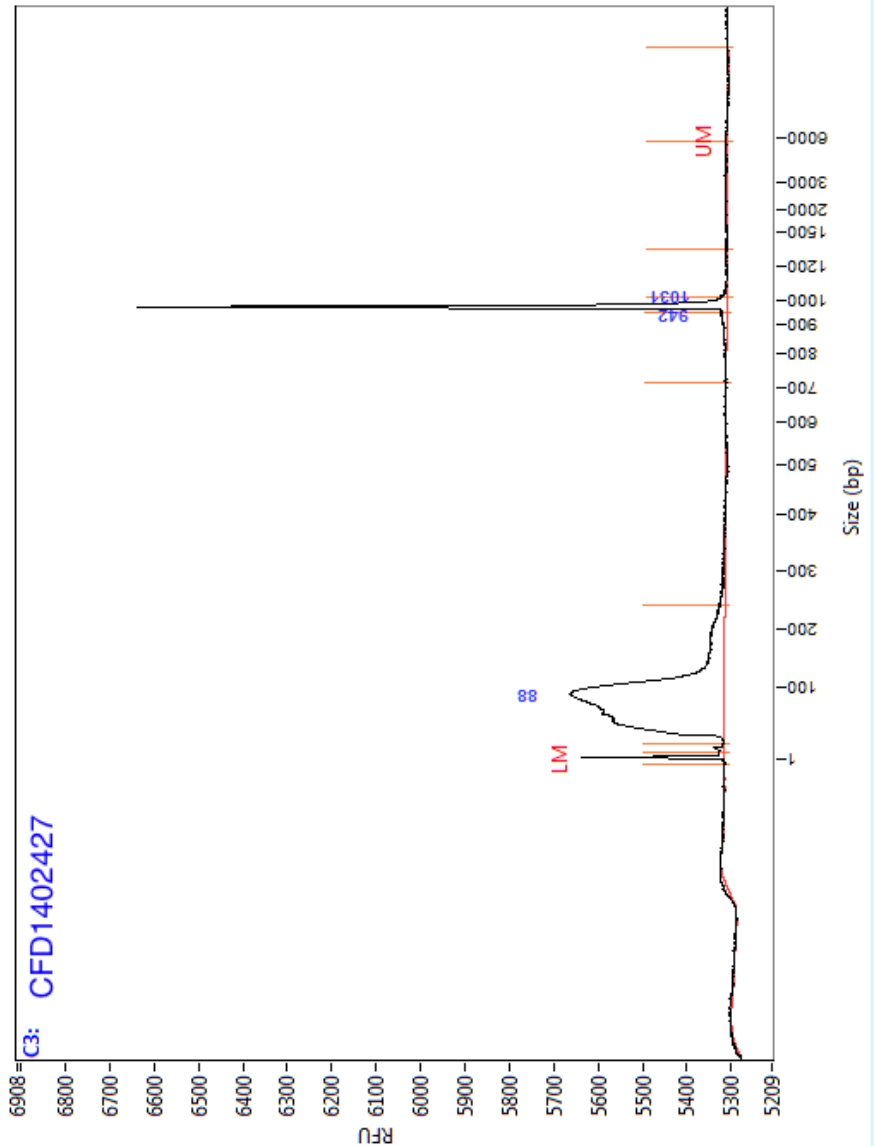

**Peak Table**

| Peak | Size (bp)    | ng/uL  | % (Conc.) (ng/uL) | nmole/L | From (bp) | To (bp) | Avg. Size | CV%    |
|------|--------------|--------|-------------------|---------|-----------|---------|-----------|--------|
| 1    | 1 (LM)       | 0.0004 |                   | 0.5401  | 0         | 10      | 1         | 170.25 |
| 2    | 88           | 0.1046 | 99.1              | 2.0445  | 23        | 241     | 84        | 43.91  |
| 3    | 942          | 0.0008 | 0.7               | 0.0015  | 713       | 952     | 877       | 6.83   |
| 4    | 1031         | 0.0002 | 0.2               | 0.0003  | 1025      | 1357    | 1118      | 9.82   |
| 5    | 6000 (UM)    | 0.0000 |                   | 0.0000  | 5861      | 12258   | 8086      | 26.03  |
|      | TIC:         | 0.1056 | ng/uL             |         |           |         |           |        |
|      | TIM:         | 2.0463 | nmole/L           |         |           |         |           |        |
|      | Total Conc.: | 0.1193 | ng/uL             |         |           |         |           |        |

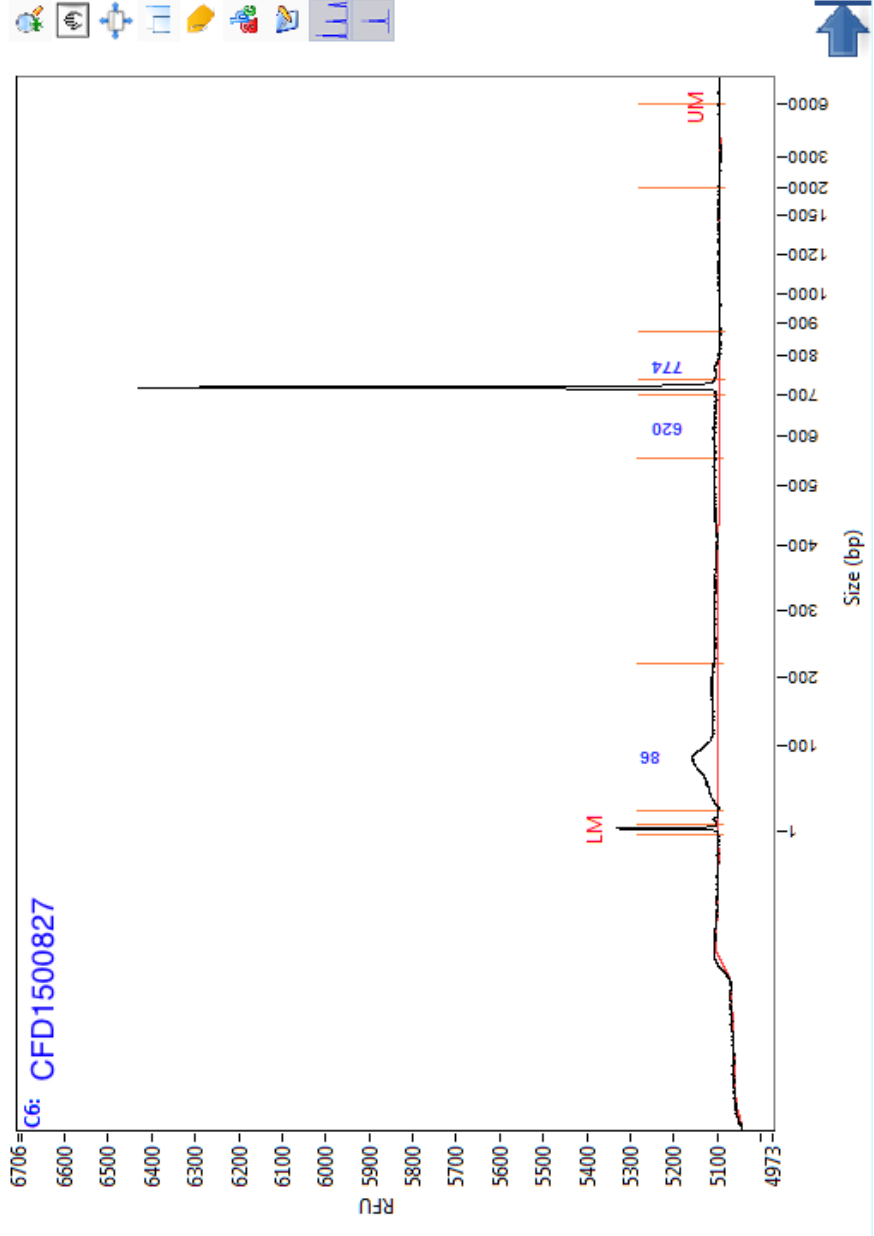

**Peak Table**

| Size (bp)     | ng/uL  | % (Conc.) (ng/uL) | n mole/L | From (bp) | To (bp) | Avg. Size | CV%    |
|---------------|--------|-------------------|----------|-----------|---------|-----------|--------|
| 1 (LM)        | 0.0004 |                   | 0.5401   | 0         | 9       | 1         | 189.44 |
| 2 (86)        | 0.0246 | 89.3              | 0.4073   | 23        | 220     | 99        | 46.41  |
| 3 (620)       | 0.0024 | 8.7               | 0.0064   | 555       | 702     | 622       | 6.60   |
| 4 (774)       | 0.0005 | 2.0               | 0.0012   | 740       | 874     | 763       | 1.69   |
| 5 (6000 (UM)) | 0.0000 |                   | 0.0000   | 2027      | 6115    | 4471      | 26.32  |
| TIC:          |        | 0.0275            | ng/uL    |           |         |           |        |
| TIM:          |        | 0.4148            | nmole/L  |           |         |           |        |
| Total Conc.:  |        | 0.0483            | ng/uL    |           |         |           |        |

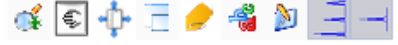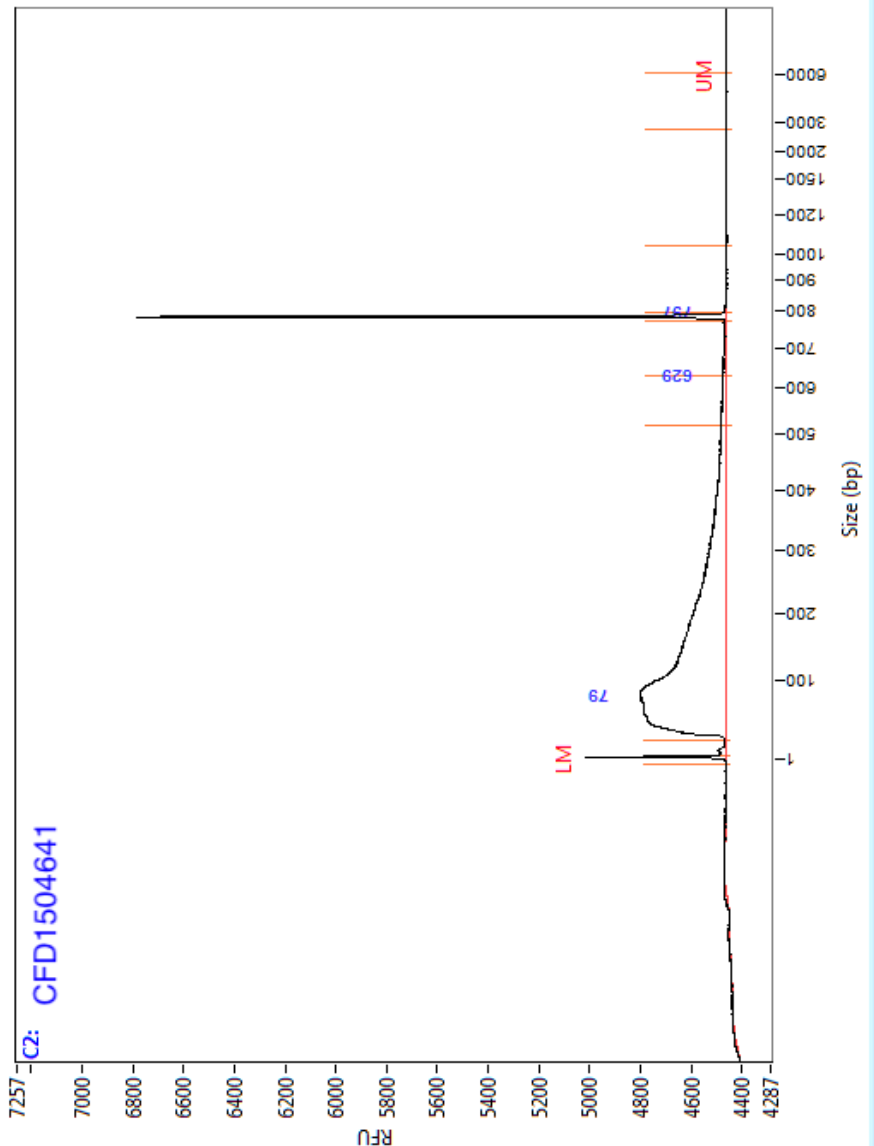

**Peak Table**

| Size (bp)     | ng/uL  | % (Conc.) (ng/uL) | nmole/L | From (bp) | To (bp) | Avg. Size | CV%    |
|---------------|--------|-------------------|---------|-----------|---------|-----------|--------|
| 1 (LM)        | 0.0004 |                   | 0.5401  | 0         | 5       | 1         | 174.44 |
| 2 (79)        | 0.1396 | 99.4              | 1.6381  | 24        | 517     | 140       | 71.85  |
| 3 (629)       | 0.0008 | 0.6               | 0.0019  | 629       | 775     | 690       | 6.27   |
| 4 (797)       | 0.0000 | 0.0               | 0.0001  | 797       | 1043    | 806       | 0.90   |
| 5 (6000 (UM)) | 0.0000 |                   | 0.0000  | 2818      | 6162    | 5307      | 23.25  |
| TIC:          |        | 0.1404            | ng/uL   |           |         |           |        |
| TIM:          |        | 1.6401            | nmole/L |           |         |           |        |
| Total Conc.:  |        | 0.1514            | ng/uL   |           |         |           |        |

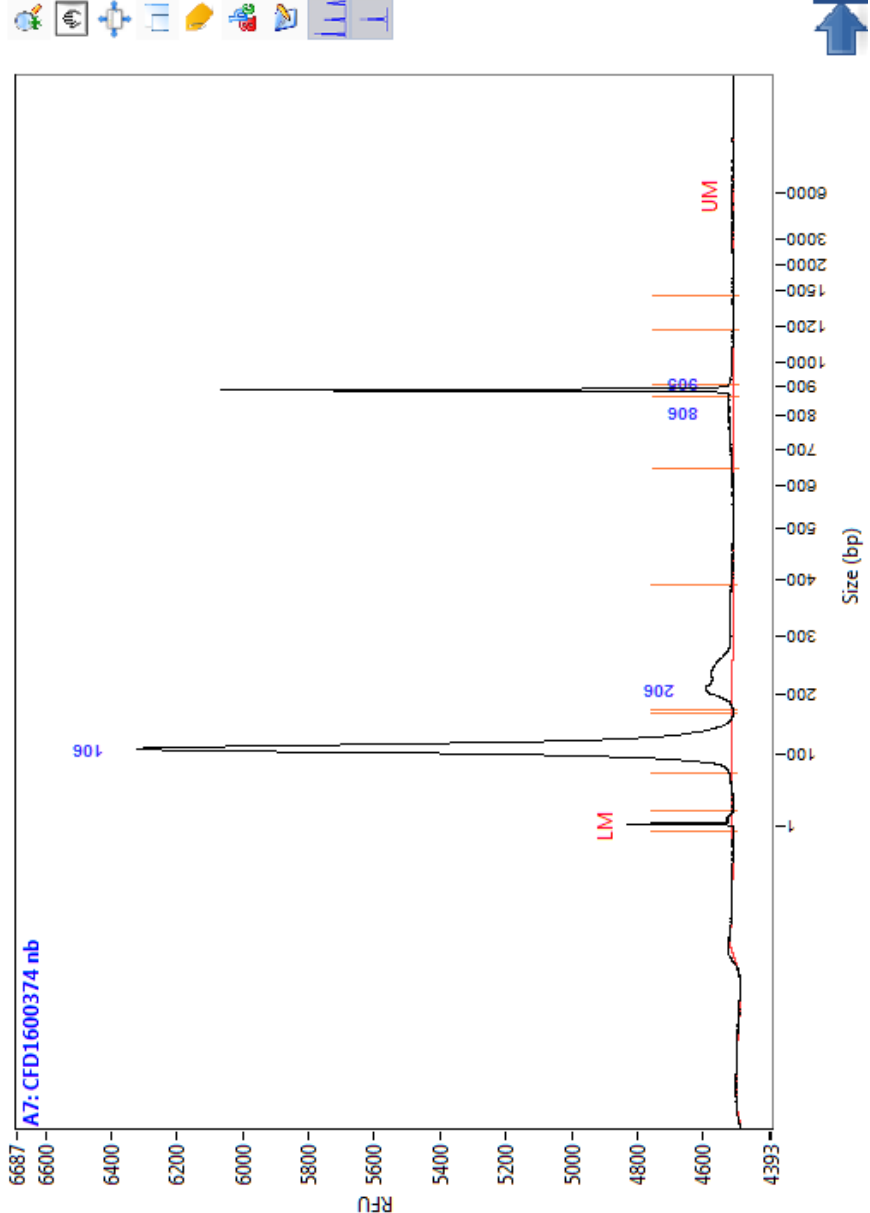

**Peak Table**

| Size (bp)                 | ng/uL  | % (Conc.) (ng/uL) | nmole/L | From (bp) | To (bp) | Avg. Size | CV%    |
|---------------------------|--------|-------------------|---------|-----------|---------|-----------|--------|
| 1 (LM)                    | 0.0007 |                   | 0.5202  | 0         | 22      | 2         | 181.14 |
| 2 106                     | 0.2281 | 88.3              | 3.5005  | 72        | 167     | 107       | 9.72   |
| 3 206                     | 0.0265 | 10.2              | 0.1836  | 172       | 392     | 237       | 17.41  |
| 4 806                     | 0.0031 | 1.2               | 0.0067  | 647       | 864     | 774       | 7.19   |
| 5 905                     | 0.0007 | 0.3               | 0.0012  | 905       | 1179    | 961       | 5.50   |
| 6 6000 (UM)               | 0.0001 |                   | 0.0000  | 1462      | 14059   | 6082      | 49.49  |
| TIC: 0.2584 ng/uL         |        |                   |         |           |         |           |        |
| TIM: 3.6920 nmole/L       |        |                   |         |           |         |           |        |
| Total Conc.: 0.2771 ng/uL |        |                   |         |           |         |           |        |

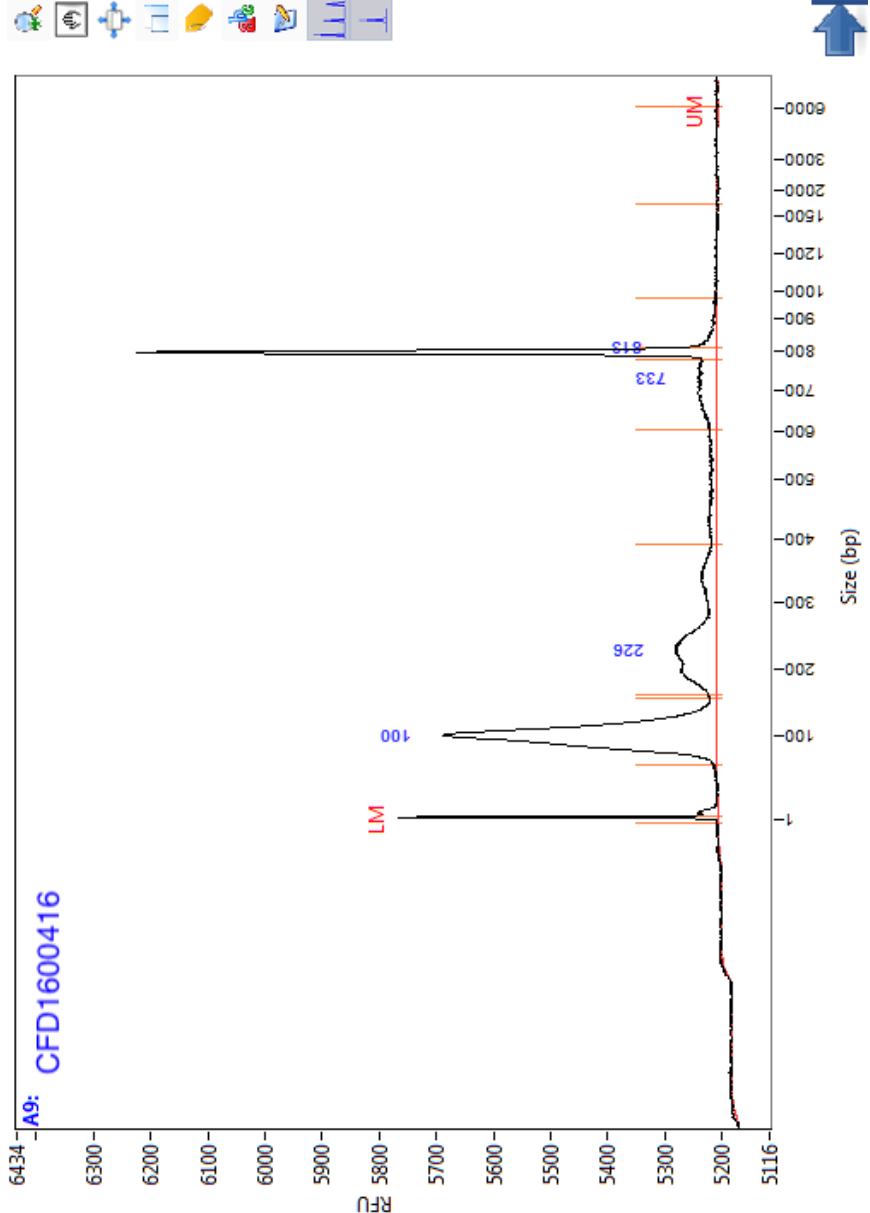

**Peak Table**

| Size (bp)    | ng/uL  | % (Conc.) (ng/uL) | nmole/L | From (bp) | To (bp) | Avg. Size | CV%    |
|--------------|--------|-------------------|---------|-----------|---------|-----------|--------|
| 1 (LM)       | 0.0011 |                   | 1.4680  | 0         | 5       | 1         | 179.29 |
| 2            | 0.1060 | 67.2              | 1.7231  | 66        | 157     | 101       | 14.17  |
| 3            | 0.0402 | 25.5              | 0.2708  | 162       | 390     | 244       | 23.05  |
| 4            | 0.0093 | 5.9               | 0.0218  | 605       | 780     | 700       | 6.70   |
| 5            | 0.0023 | 1.4               | 0.0044  | 813       | 980     | 852       | 4.58   |
| 6            | 0.0000 |                   | 0.0000  | 1758      | 6169    | 5091      | 18.00  |
| TIC:         |        | 0.1577            | ng/uL   |           |         |           |        |
| TIM:         |        | 2.0200            | nmole/L |           |         |           |        |
| Total Conc.: |        | 0.1911            | ng/uL   |           |         |           |        |

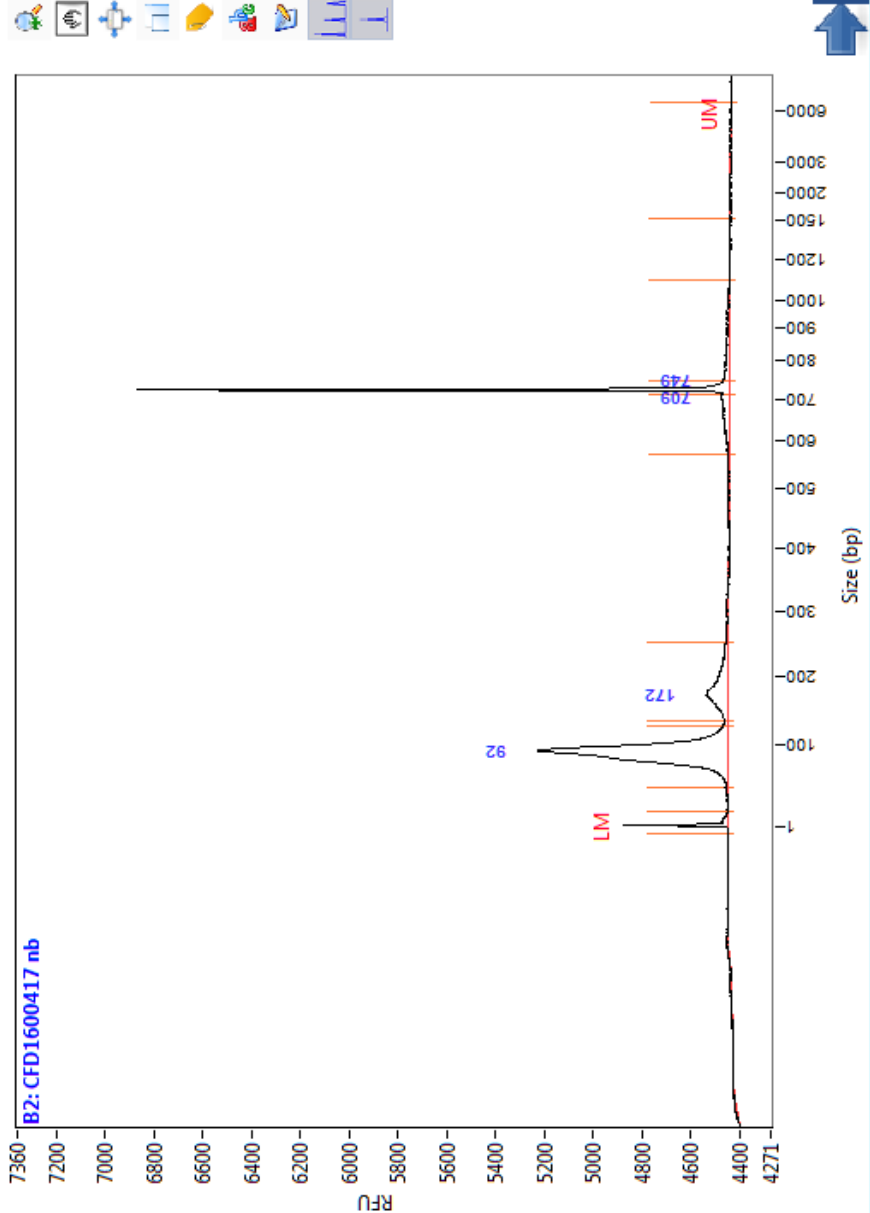

**Peak Table**

| Peak #       | Size (bp) | ng/uL  | % (Conc.) (ng/uL) | nmole/L | From (bp) | To (bp) | Avg. Size | CV%    |
|--------------|-----------|--------|-------------------|---------|-----------|---------|-----------|--------|
| 1            | 1 (LM)    | 0.0005 |                   | 0.3937  | 0         | 19      | 2         | 188.49 |
| 2            | 92        | 0.0759 | 78.8              | 1.4165  | 50        | 129     | 88        | 12.25  |
| 3            | 172       | 0.0144 | 14.9              | 0.1301  | 136       | 253     | 182       | 14.14  |
| 4            | 709       | 0.0032 | 3.3               | 0.0080  | 571       | 715     | 659       | 5.77   |
| 5            | 749       | 0.0028 | 2.9               | 0.0054  | 749       | 1102    | 851       | 9.45   |
| 6            | 6000 (UM) | 0.0000 |                   | 0.0000  | 1538      | 6596    | 5328      | 14.98  |
| TIC:         |           | 0.0964 | ng/uL             |         |           |         |           |        |
| TIM:         |           | 1.5600 | nmole/L           |         |           |         |           |        |
| Total Conc.: |           | 0.1133 | ng/uL             |         |           |         |           |        |

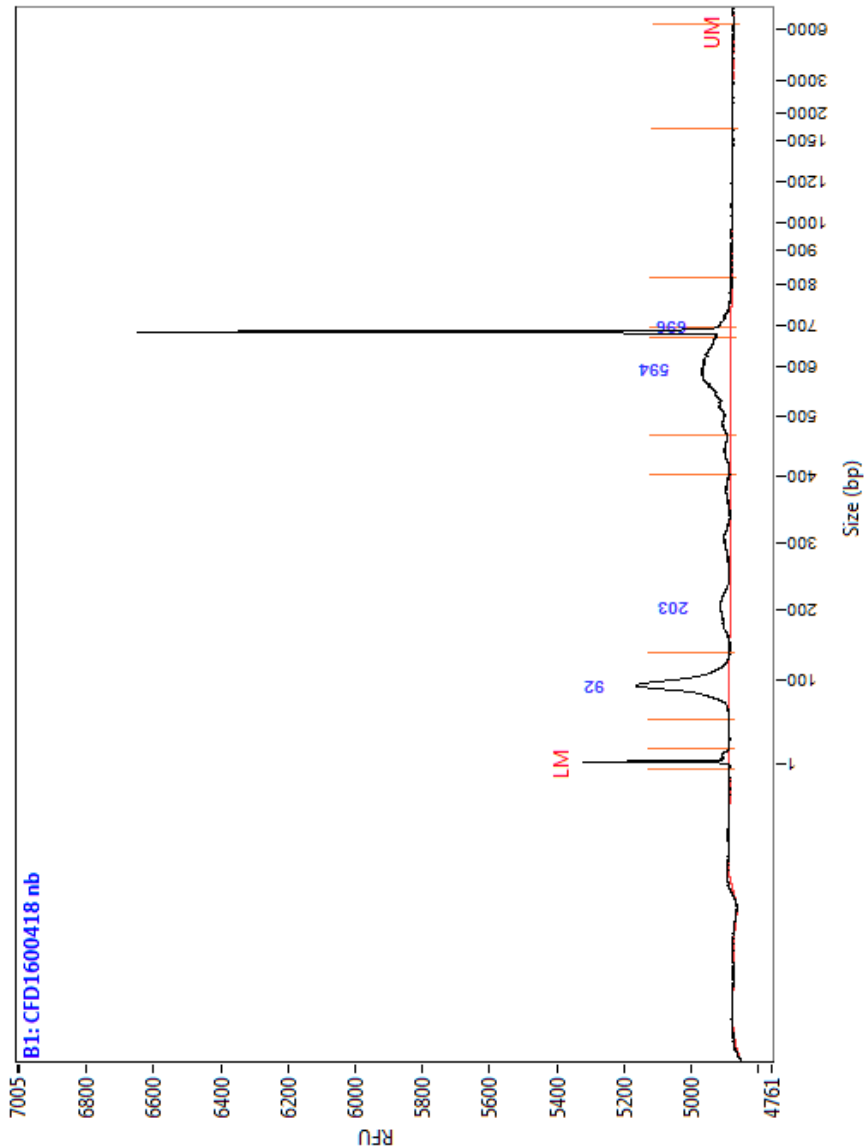

**Peak Table**

| Peak         | Size (bp) | ng/uL  | % (Conc.) (ng/uL) | nmole/L | From (bp) | To (bp) | Avg. Size | CV%    |
|--------------|-----------|--------|-------------------|---------|-----------|---------|-----------|--------|
| 1            | 1 (LM)    | 0.0005 |                   | 0.3937  | 0         | 18      | 2         | 159.35 |
| 2            | 92        | 0.0232 | 50.0              | 0.4135  | 53        | 140     | 92        | 10.62  |
| 3            | 203       | 0.0072 | 15.6              | 0.0473  | 140       | 403     | 251       | 27.75  |
| 4            | 594       | 0.0147 | 31.7              | 0.0416  | 469       | 671     | 582       | 8.47   |
| 5            | 696       | 0.0012 | 2.7               | 0.0029  | 696       | 822     | 720       | 2.98   |
| 6            | 6000 (UM) | 0.0000 |                   | 0.0000  | 1736      | 6344    | 4714      | 27.40  |
| TIC:         |           | 0.0464 | ng/uL             |         |           |         |           |        |
| TIM:         |           | 0.5053 | nmole/L           |         |           |         |           |        |
| Total Conc.: |           | 0.0582 | ng/uL             |         |           |         |           |        |

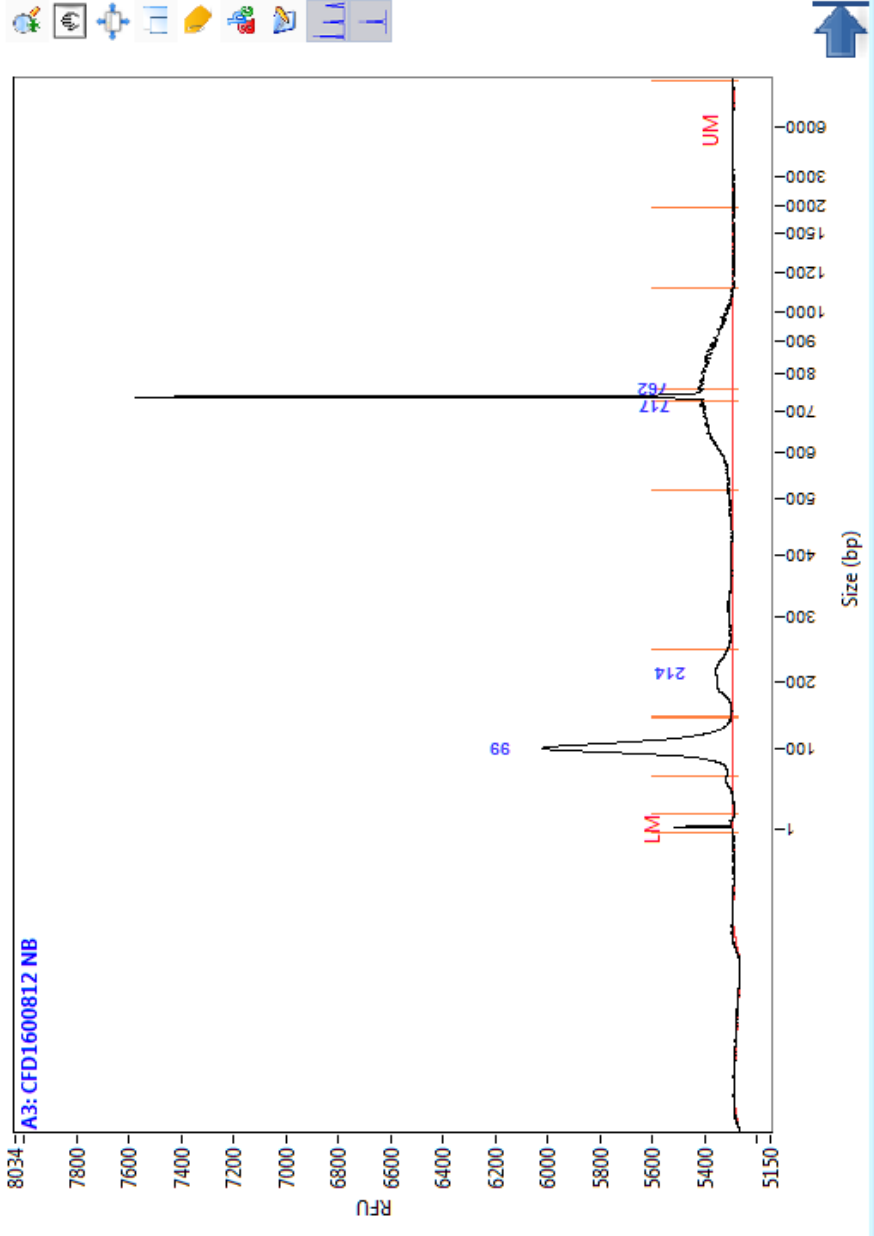

**Peak Table**

| Size (bp)    | ng/uL  | % (Conc.) (ng/uL) | nmole/L | From (bp) | To (bp) | Avg. Size | CV%    |
|--------------|--------|-------------------|---------|-----------|---------|-----------|--------|
| 1 (LM)       | 0.0003 |                   | 0.3525  | 0         | 19      | 1         | 168.54 |
| 2            | 0.0623 | 56.7              | 1.0223  | 66        | 146     | 100       | 11.00  |
| 3            | 0.0124 | 11.3              | 0.0986  | 149       | 250     | 206       | 10.52  |
| 4            | 0.0174 | 15.8              | 0.0438  | 518       | 727     | 652       | 7.95   |
| 5            | 0.0179 | 16.3              | 0.0346  | 759       | 1126    | 850       | 8.23   |
| 6            | 0.0000 |                   | 0.0000  | 1987      | 9002    | 6735      | 16.89  |
| TIC:         |        | 0.1098            | ng/uL   |           |         |           |        |
| TIM:         |        | 1.1994            | nmole/L |           |         |           |        |
| Total Conc.: |        | 0.1338            | ng/uL   |           |         |           |        |



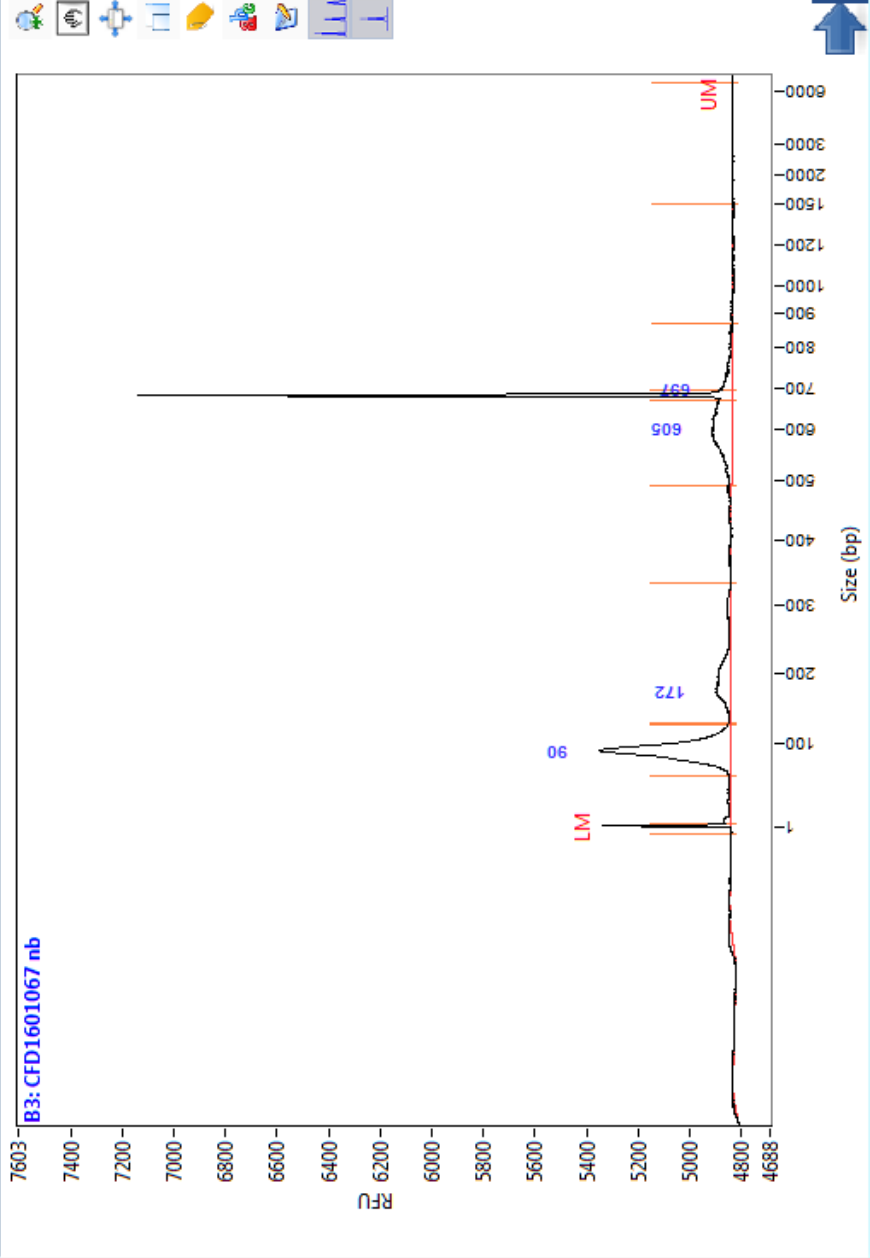

**Peak Table**

| Peak         | Size (bp) | ng/uL  | % (Conc.) (ng/uL) | nmole/L | From (bp) | To (bp) | Avg. Size | CV%    |
|--------------|-----------|--------|-------------------|---------|-----------|---------|-----------|--------|
| 1            | 1 (LM)    | 0.0005 |                   | 0.7062  | 0         | 4       | 1         | 191.91 |
| 2            | 90        | 0.0485 | 63.1              | 0.8942  | 62        | 128     | 89        | 11.23  |
| 3            | 172       | 0.0139 | 18.1              | 0.1124  | 127       | 336     | 203       | 22.12  |
| 4            | 605       | 0.0122 | 15.9              | 0.0337  | 491       | 672     | 596       | 7.20   |
| 5            | 697       | 0.0023 | 2.9               | 0.0050  | 697       | 874     | 741       | 5.27   |
| 6            | 6000 (UM) | 0.0000 |                   | 0.0000  | 1508      | 6596    | 5009      | 20.21  |
| TIC:         |           | 0.0768 | ng/uL             |         |           |         |           |        |
| TIM:         |           | 1.0453 | nmole/L           |         |           |         |           |        |
| Total Conc.: |           | 0.0953 | ng/uL             |         |           |         |           |        |

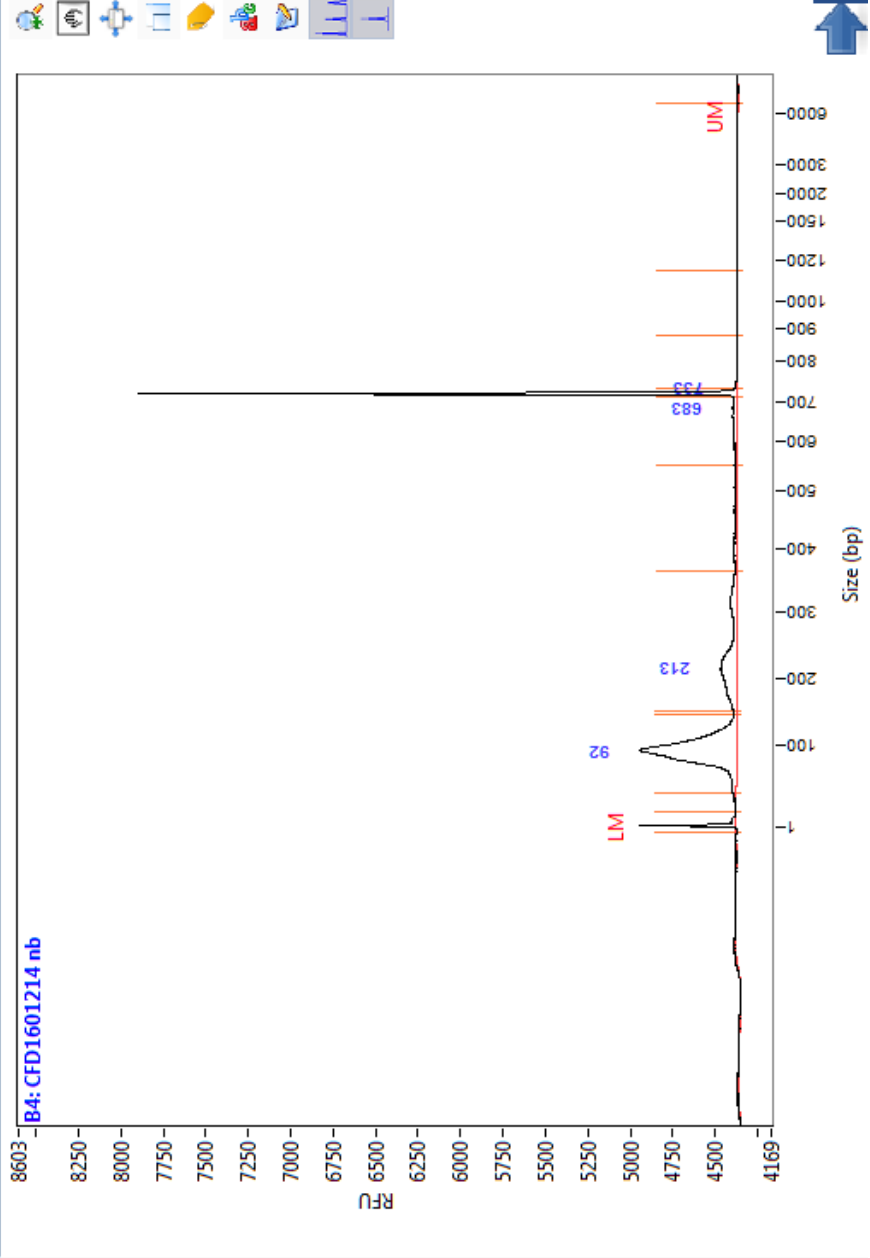

**Peak Table**

| Peak         | Size (bp) | ng/uL  | % (Conc.) (ng/uL) | nmole/L | From (bp) | To (bp) | Avg. Size | CV%    |
|--------------|-----------|--------|-------------------|---------|-----------|---------|-----------|--------|
| 1            | 1 (LM)    | 0.0005 |                   | 0.3937  | 0         | 20      | 2         | 187.72 |
| 2            | 92        | 0.0565 | 72.4              | 1.0088  | 41        | 146     | 92        | 17.18  |
| 3            | 213       | 0.0188 | 24.1              | 0.1337  | 150       | 366     | 231       | 22.91  |
| 4            | 683       | 0.0026 | 3.3               | 0.0067  | 551       | 712     | 636       | 7.15   |
| 5            | 733       | 0.0002 | 0.2               | 0.0004  | 733       | 884     | 745       | 1.79   |
| 6            | 6000 (UM) | 0.0000 |                   | 0.0000  | 1157      | 6665    | 4668      | 34.87  |
| TIC:         |           | 0.0781 | ng/uL             |         |           |         |           |        |
| TIM:         |           | 1.1495 | nmole/L           |         |           |         |           |        |
| Total Conc.: |           | 0.0966 | ng/uL             |         |           |         |           |        |

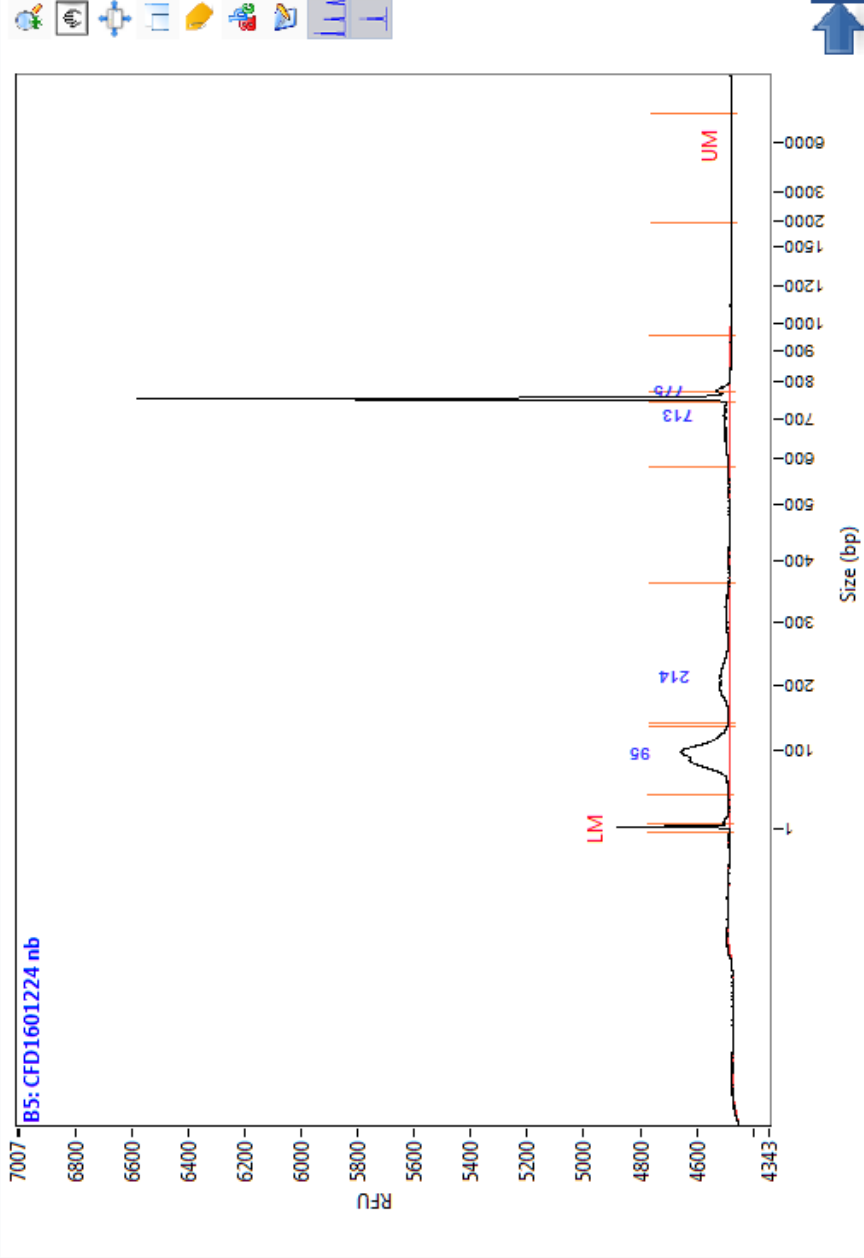

**Peak Table**

| Size (bp)    | ng/uL       | % (Conc.) (ng/uL) | nmole/L | From (bp) | To (bp) | Avg. Size | CV%    |
|--------------|-------------|-------------------|---------|-----------|---------|-----------|--------|
| 1 (LM)       | 0.0005      |                   | 0.7062  | 0         | 8       | 1         | 173.23 |
| 2            | 0.0293      | 67.5              | 0.5232  | 44        | 137     | 92        | 15.45  |
| 3            | 0.0099      | 22.7              | 0.0700  | 142       | 363     | 232       | 22.22  |
| 4            | 0.0034      | 7.8               | 0.0082  | 581       | 748     | 673       | 6.60   |
| 5            | 0.0009      | 2.0               | 0.0019  | 775       | 958     | 784       | 1.05   |
| 6            | 0.0000 (UM) |                   | 0.0000  | 1993      | 7925    | 7163      | 9.39   |
| TIC:         |             | 0.0434            | ng/uL   |           |         |           |        |
| TIM:         |             | 0.6033            | nmole/L |           |         |           |        |
| Total Conc.: |             | 0.0605            | ng/uL   |           |         |           |        |

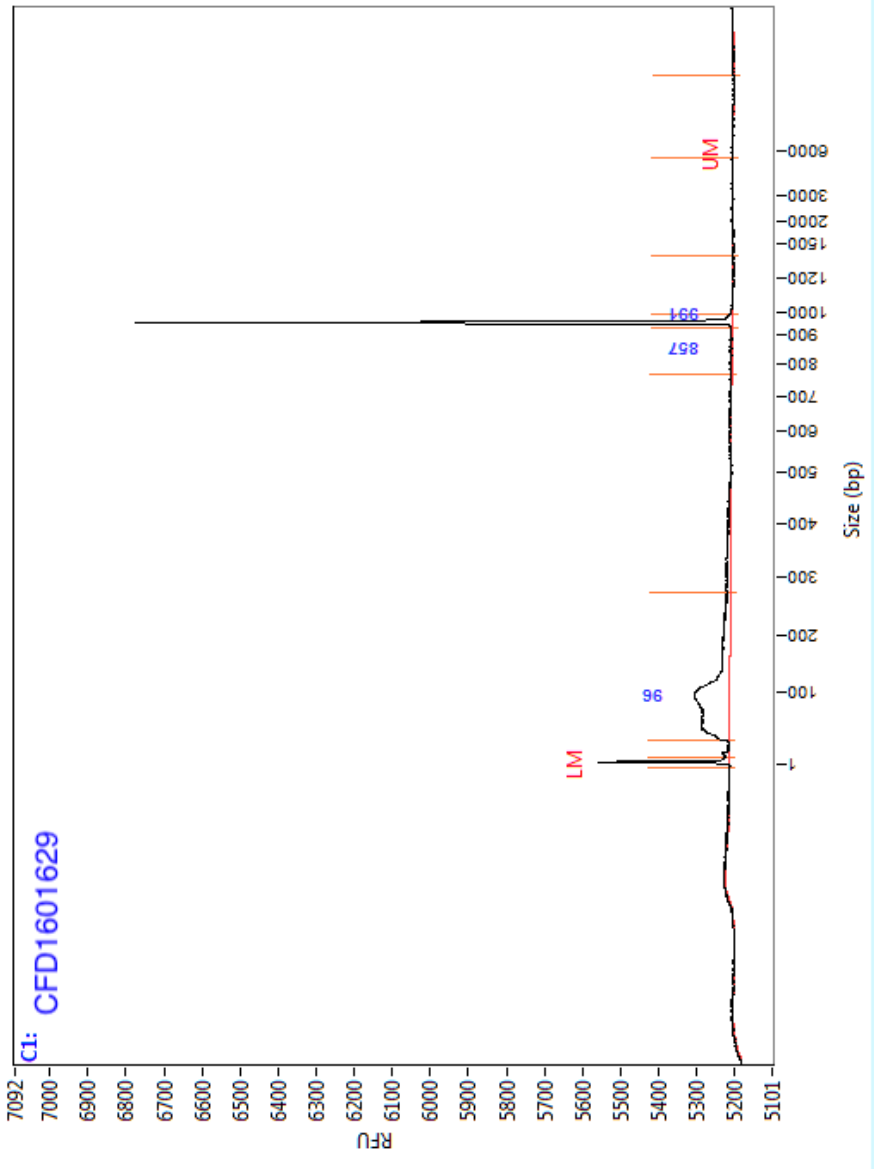

**Peak Table**

| Size (bp)    | ng/uL  | % (Conc.) (ng/uL) | nmole/L | From (bp) | To (bp) | Avg. Size | CV%    |
|--------------|--------|-------------------|---------|-----------|---------|-----------|--------|
| 1 (LM)       | 0.0004 |                   | 0.5401  | 0         | 9       | 1         | 169.22 |
| 2            | 0.0314 | 98.9              | 0.5111  | 34        | 272     | 101       | 52.29  |
| 3            | 0.0003 | 1.0               | 0.0006  | 768       | 932     | 840       | 5.95   |
| 4            | 0.0000 | 0.1               | 0.0001  | 991       | 1402    | 1005      | 1.65   |
| 5            | 0.0000 |                   | 0.0000  | 5605      | 11288   | 6766      | 16.16  |
| TIC:         |        | 0.0318            | ng/uL   |           |         |           |        |
| TIM:         |        | 0.5118            | nmole/L |           |         |           |        |
| Total Conc.: |        | 0.0456            | ng/uL   |           |         |           |        |

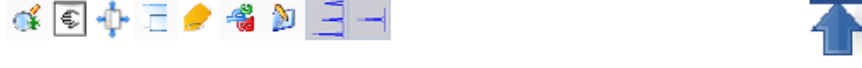

**Peak Table**

| Size (bp)                 | ng/uL  | % (Conc.) (ng/uL) | nmole/L | From (bp) | To (bp) | Avg. Size | CV%    |
|---------------------------|--------|-------------------|---------|-----------|---------|-----------|--------|
| 1 (LM)                    | 0.0007 |                   | 0.9609  | 0         | 5       | 1         | 198.47 |
| 2 107                     | 0.0324 | 49.5              | 0.5164  | 69        | 136     | 103       | 12.12  |
| 3 202                     | 0.0125 | 19.0              | 0.0971  | 142       | 271     | 211       | 13.24  |
| 4 868                     | 0.0090 | 13.7              | 0.0188  | 647       | 869     | 783       | 7.40   |
| 5 968                     | 0.0117 | 17.8              | 0.0164  | 920       | 2647    | 1169      | 24.77  |
| 6 6000 (UM)               | 0.0000 |                   | 0.0000  | 5313      | 11641   | 7414      | 26.00  |
| TIC: 0.0655 ng/uL         |        |                   |         |           |         |           |        |
| TIM: 0.6487 nmole/L       |        |                   |         |           |         |           |        |
| Total Conc.: 0.0960 ng/uL |        |                   |         |           |         |           |        |

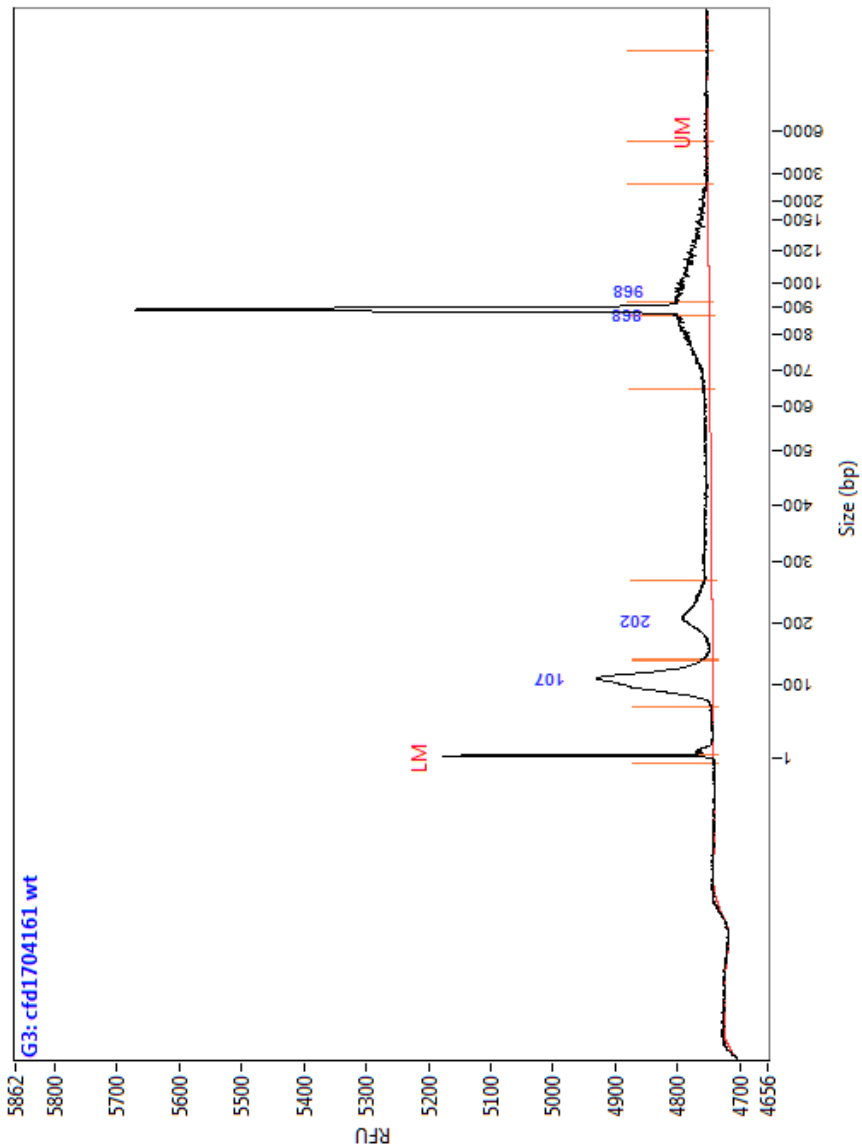

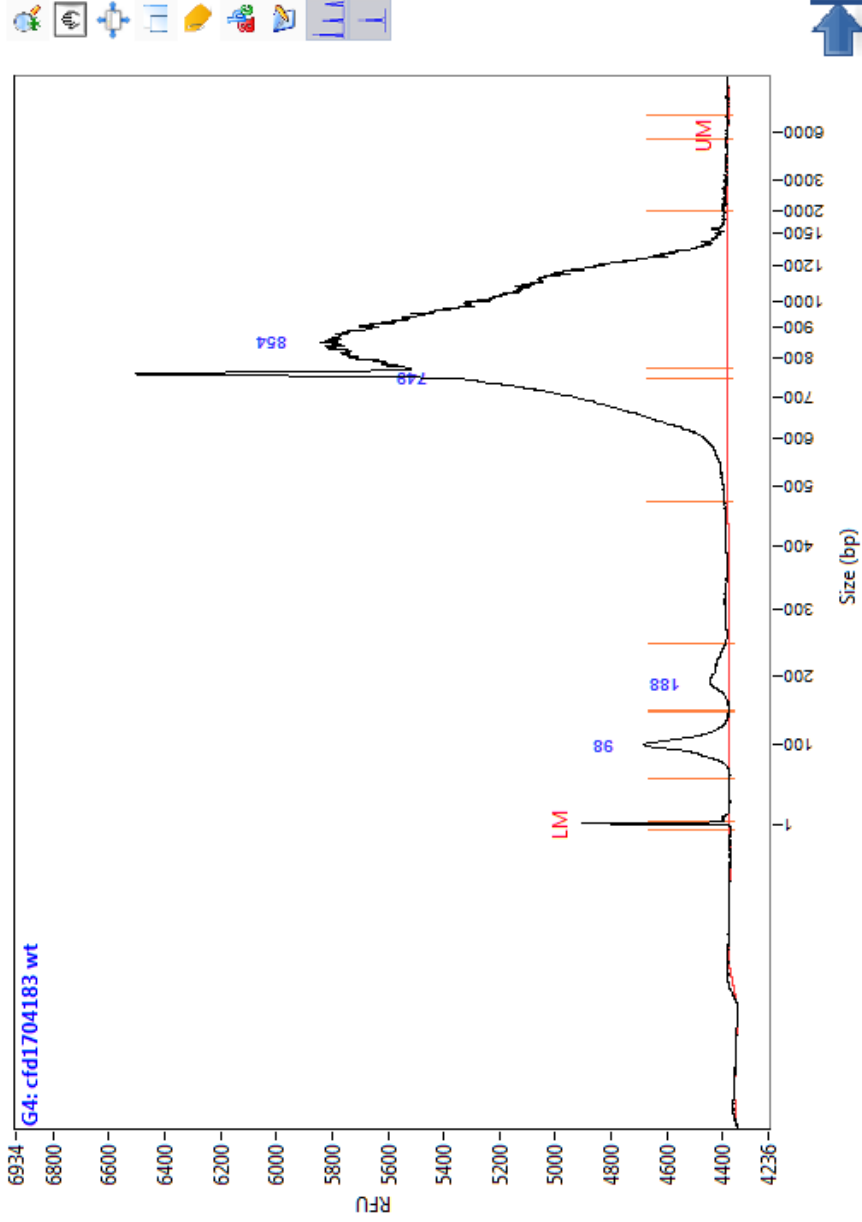

**Peak Table**

| Size (bp)    | ng/uL  | %(Conc.)<br>(ng/uL) | nmole/L | From (bp) | To (bp) | Avg. Size | CV%    |
|--------------|--------|---------------------|---------|-----------|---------|-----------|--------|
| 1 (LM)       | 0.0007 |                     | 0.9609  | 0         | 5       | 1         | 145.75 |
| 2            | 0.0374 | 6.8                 | 0.6274  | 59        | 148     | 98        | 11.27  |
| 3            | 0.0133 | 2.4                 | 0.1083  | 149       | 248     | 202       | 9.79   |
| 4            | 0.1076 | 19.4                | 0.2577  | 474       | 750     | 687       | 7.82   |
| 5            | 0.3953 | 71.4                | 0.6914  | 776       | 2036    | 941       | 14.86  |
| 6            | 0.0000 |                     | 0.0000  | 5725      | 7160    | 6375      | 7.19   |
| TIC:         |        | 0.5536              | ng/uL   |           |         |           |        |
| TIM:         |        | 1.6848              | nmole/L |           |         |           |        |
| Total Conc.: |        | 0.6173              | ng/uL   |           |         |           |        |

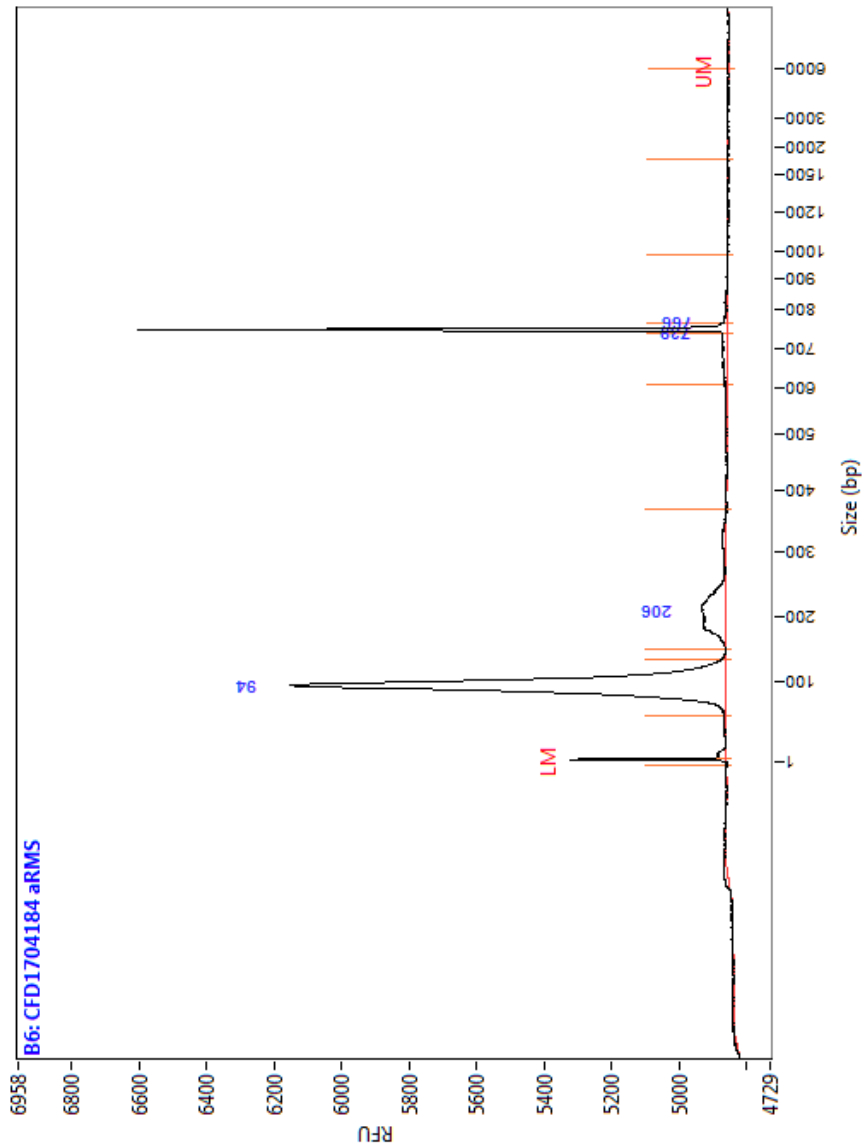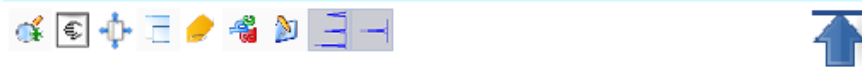

**Peak Table**

| Peak         | Size (bp) | ng/uL  | % (Conc.) (ng/uL) | nmole/L | From (bp) | To (bp) | Avg. Size | CV%    |
|--------------|-----------|--------|-------------------|---------|-----------|---------|-----------|--------|
| 1            | 1 (LM)    | 0.0005 |                   | 0.7062  | 0         | 5       | 1         | 176.80 |
| 2            | 94        | 0.1121 | 85.7              | 1.9582  | 58        | 134     | 94        | 10.40  |
| 3            | 206       | 0.0167 | 12.8              | 0.1278  | 149       | 372     | 215       | 18.83  |
| 4            | 739       | 0.0017 | 1.3               | 0.0040  | 607       | 740     | 681       | 5.31   |
| 5            | 766       | 0.0004 | 0.3               | 0.0008  | 766       | 990     | 801       | 4.07   |
| 6            | 6000 (UM) | 0.0000 |                   | 0.0000  | 1795      | 6092    | 5784      | 8.18   |
| TIC:         |           | 0.1309 | ng/uL             |         |           |         |           |        |
| TIM:         |           | 2.0908 | nmole/L           |         |           |         |           |        |
| Total Conc.: |           | 0.1444 | ng/uL             |         |           |         |           |        |

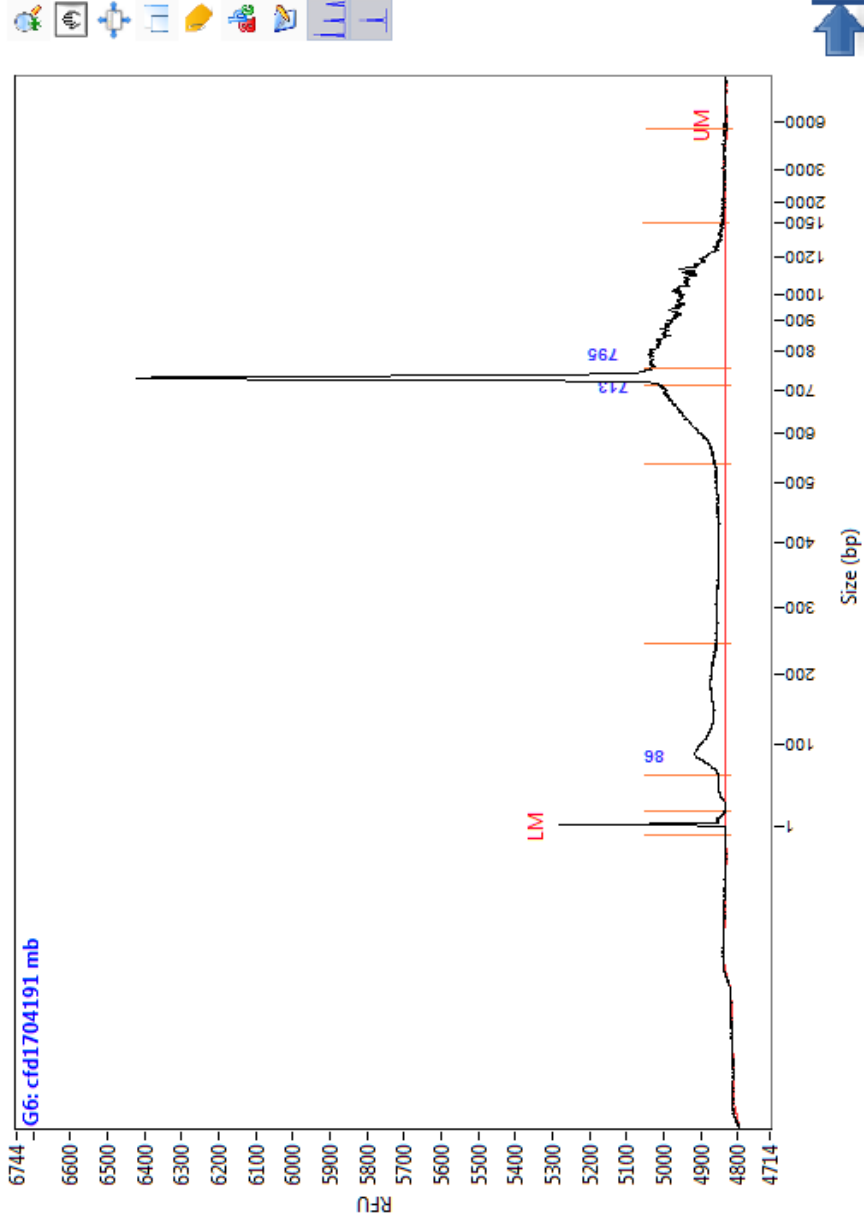

**Peak Table**

| Size (bp)                 | ng/uL  | % (Conc.) (ng/uL) | nmole/L | From (bp) | To (bp) | Avg. Size | CV%    |
|---------------------------|--------|-------------------|---------|-----------|---------|-----------|--------|
| 1 (LM)                    | 0.0007 |                   | 0.5357  | 0         | 20      | 2         | 160.33 |
| 2                         | 0.0354 | 30.4              | 0.4272  | 63        | 245     | 136       | 37.87  |
| 3                         | 0.0272 | 23.4              | 0.0692  | 536       | 715     | 647       | 7.25   |
| 4                         | 0.0537 | 46.2              | 0.0959  | 759       | 1527    | 921       | 14.88  |
| 5                         | 0.0000 |                   | 0.0000  | 5702      | 8866    | 6777      | 14.10  |
| TIC: 0.1162 ng/uL         |        |                   |         |           |         |           |        |
| TIM: 0.5923 nmole/L       |        |                   |         |           |         |           |        |
| Total Conc.: 0.1710 ng/uL |        |                   |         |           |         |           |        |



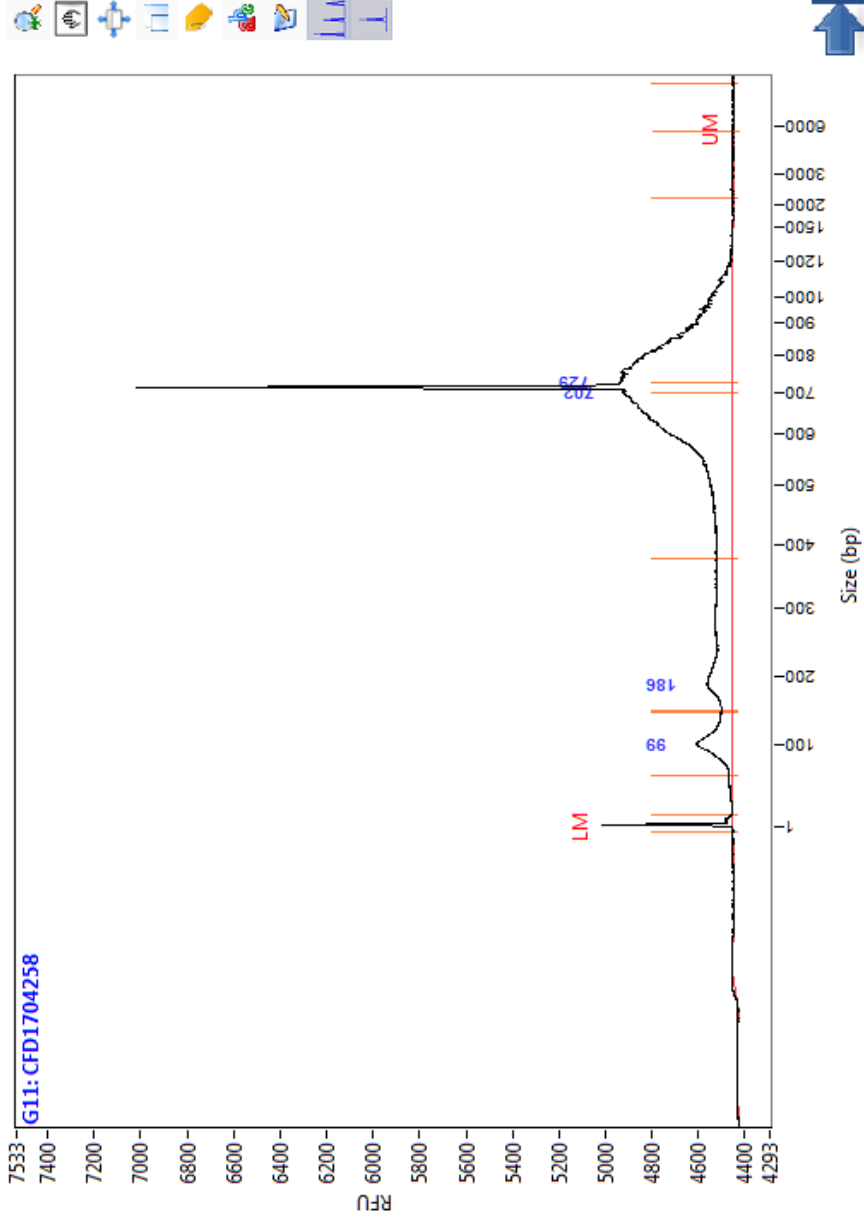

**Peak Table**

| Size (bp)                 | ng/uL       | % (Conc.) (ng/uL) | nmole/L | From (bp) | To (bp) | Avg. Size | CV%    |
|---------------------------|-------------|-------------------|---------|-----------|---------|-----------|--------|
| 1 (LM)                    | 0.0007      |                   | 0.5357  | 0         | 16      | 2         | 157.74 |
| 2                         | 0.0270      | 11.2              | 0.4229  | 63        | 150     | 105       | 18.98  |
| 3                         | 0.0506      | 21.0              | 0.3275  | 148       | 377     | 254       | 25.57  |
| 4                         | 0.0917      | 38.1              | 0.2584  | 377       | 703     | 584       | 15.63  |
| 5                         | 0.0715      | 29.7              | 0.1413  | 729       | 2271    | 833       | 12.32  |
| 6                         | 0.0000 (UM) |                   | 0.0000  | 5771      | 8729    | 6862      | 12.63  |
| TIC: 0.2409 ng/uL         |             |                   |         |           |         |           |        |
| TIM: 1.1502 nmole/L       |             |                   |         |           |         |           |        |
| Total Conc.: 0.2687 ng/uL |             |                   |         |           |         |           |        |

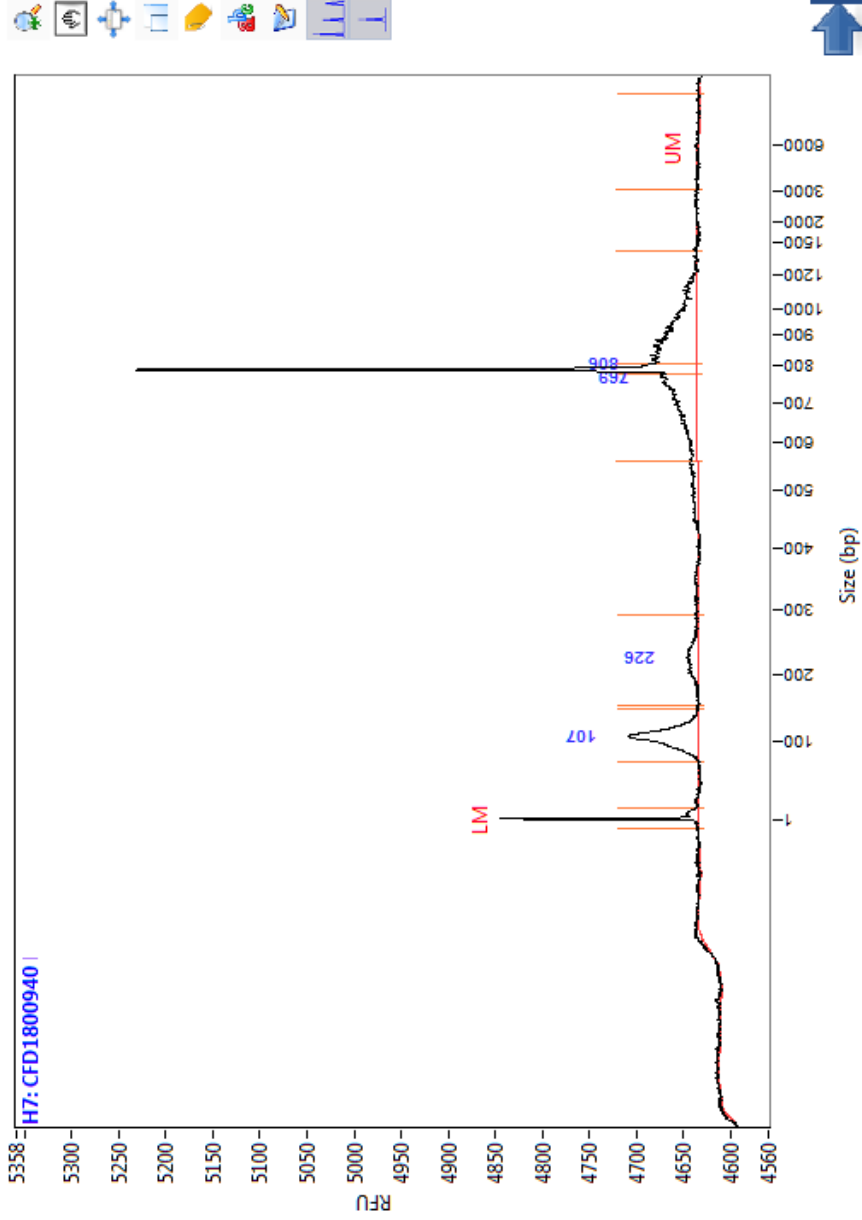

**Peak Table**

| Size (bp)                 | ng/uL  | % (Conc.) (ng/uL) | nmole/L | From (bp) | To (bp) | Avg. Size | CV%    |
|---------------------------|--------|-------------------|---------|-----------|---------|-----------|--------|
| 1 (LM)                    | 0.0007 |                   | 0.5357  | 0         | 18      | 2         | 184.61 |
| 2                         | 0.0173 | 37.4              | 0.2713  | 75        | 150     | 105       | 10.91  |
| 3                         | 0.0039 | 8.4               | 0.0288  | 155       | 292     | 223       | 9.54   |
| 4                         | 0.0108 | 23.3              | 0.0254  | 561       | 778     | 700       | 8.16   |
| 5                         | 0.0143 | 30.8              | 0.0258  | 806       | 1425    | 912       | 10.09  |
| 6                         | 0.0000 |                   | 0.0000  | 3184      | 9389    | 7472      | 14.83  |
| TIC: 0.0463 ng/uL         |        |                   |         |           |         |           |        |
| TIM: 0.3513 nmole/L       |        |                   |         |           |         |           |        |
| Total Conc.: 0.0604 ng/uL |        |                   |         |           |         |           |        |

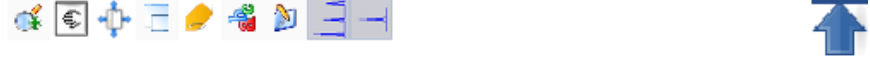

**Peak Table**

| Size (bp)                 | ng/uL       | % (Conc.) (ng/uL) | nmole/L | From (bp) | To (bp) | Avg. Size | CV%    |
|---------------------------|-------------|-------------------|---------|-----------|---------|-----------|--------|
| 1 (LM)                    | 0.0007      |                   | 0.9609  | 0         | 5       | 1         | 150.17 |
| 2                         | 0.1383      | 71.2              | 2.3658  | 63        | 139     | 96        | 9.51   |
| 3                         | 0.0179      | 9.2               | 0.1337  | 140       | 357     | 220       | 20.65  |
| 4                         | 0.0129      | 6.6               | 0.0309  | 571       | 742     | 684       | 6.16   |
| 5                         | 0.0251      | 12.9              | 0.0461  | 775       | 1490    | 897       | 12.21  |
| 6                         | 0.0000 (UM) |                   | 0.0000  | 4787      | 8911    | 6982      | 17.40  |
| TIC: 0.1942 ng/uL         |             |                   |         |           |         |           |        |
| TIM: 2.5766 nmole/L       |             |                   |         |           |         |           |        |
| Total Conc.: 0.2227 ng/uL |             |                   |         |           |         |           |        |

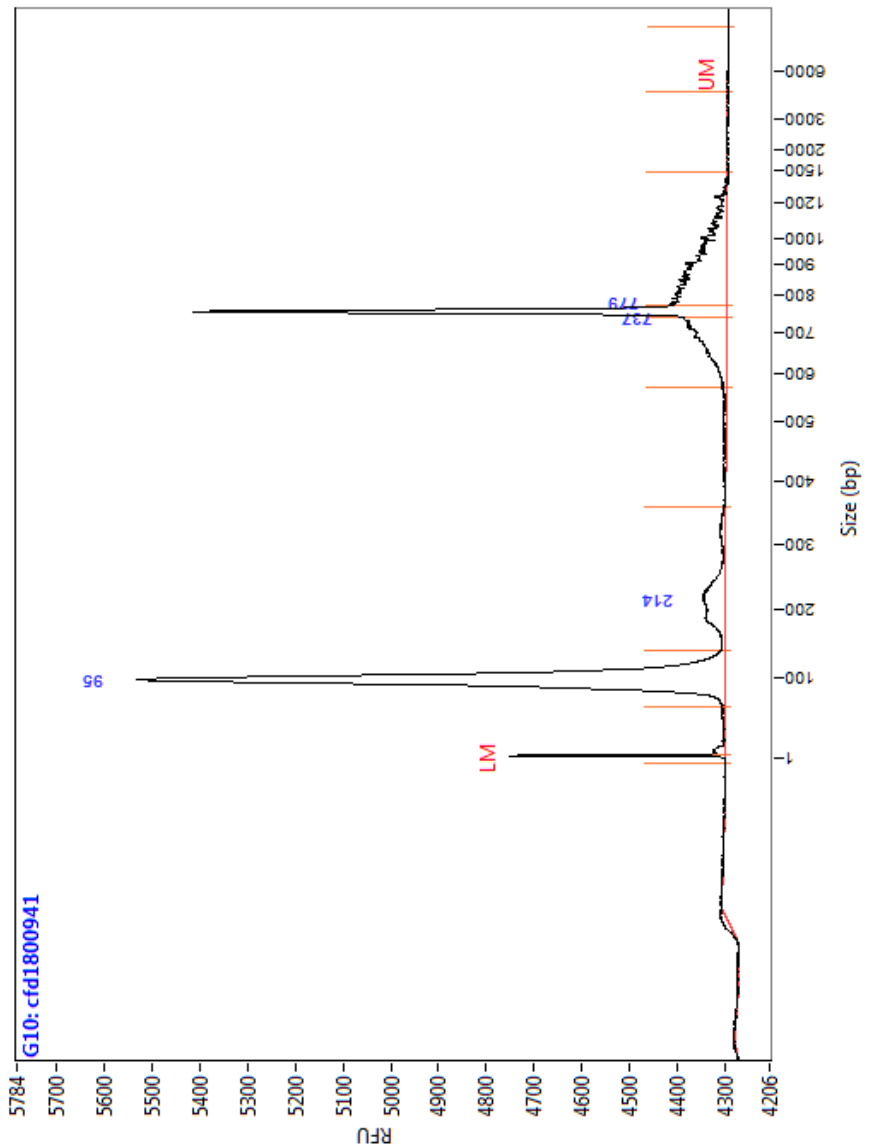

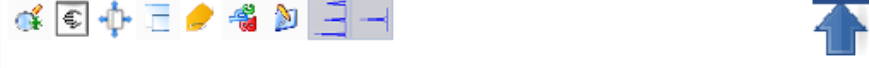

**Peak Table**

| Size (bp)                 | ng/uL       | % (Conc.) (ng/uL) | nmole/L | From (bp) | To (bp) | Avg. Size | CV%    |
|---------------------------|-------------|-------------------|---------|-----------|---------|-----------|--------|
| 1 (LM)                    | 0.0007      |                   | 0.9609  | 0         | 7       | 1         | 199.41 |
| 2                         | 0.0070      | 17.8              | 0.1079  | 80        | 143     | 106       | 8.66   |
| 3                         | 0.0009      | 2.4               | 0.0069  | 171       | 252     | 222       | 5.18   |
| 4                         | 0.0146      | 37.3              | 0.0350  | 476       | 761     | 687       | 9.09   |
| 5                         | 0.0166      | 42.5              | 0.0309  | 797       | 1217    | 887       | 9.11   |
| 6                         | 0.0000 (UM) |                   | 0.0000  | 2894      | 7069    | 6233      | 10.11  |
| TIC: 0.0391 ng/uL         |             |                   |         |           |         |           |        |
| TIM: 0.1807 nmole/L       |             |                   |         |           |         |           |        |
| Total Conc.: 0.0559 ng/uL |             |                   |         |           |         |           |        |

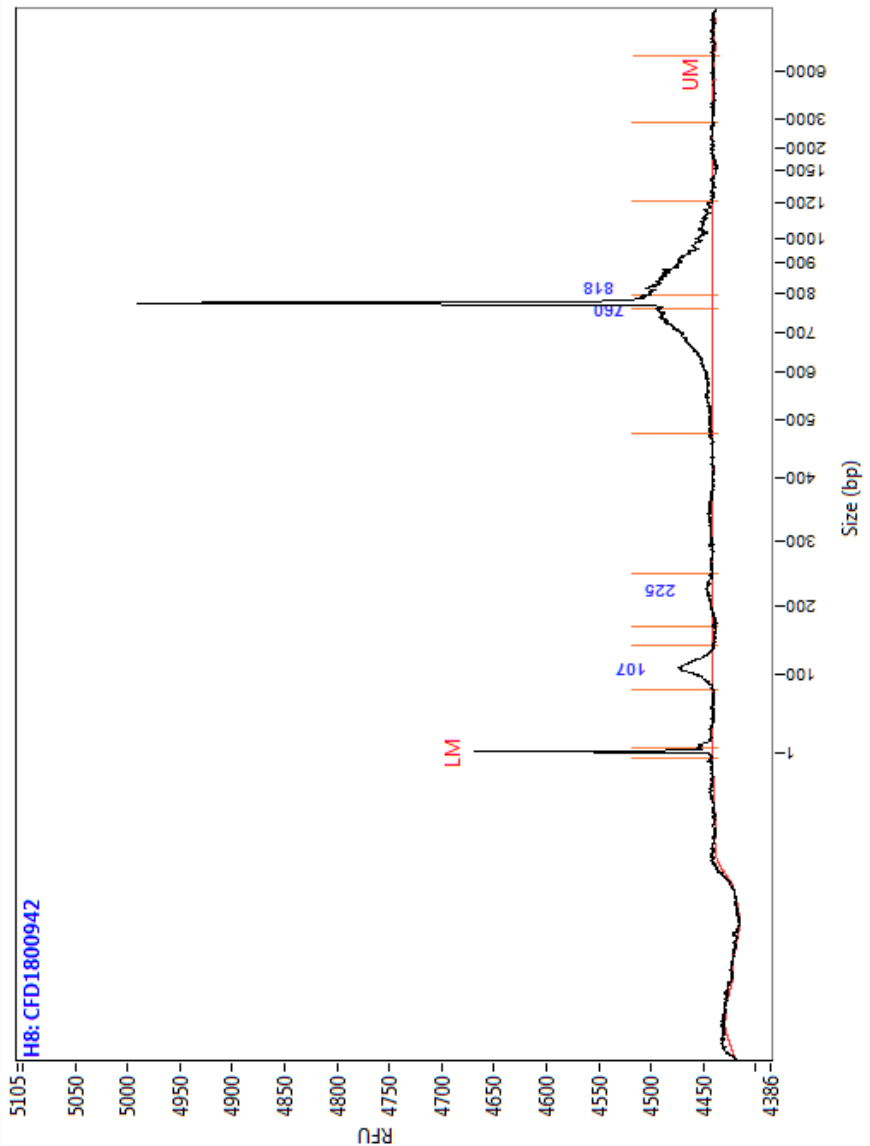

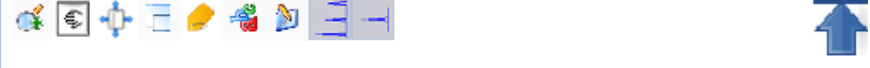

**Peak Table**

| Size (bp)    | ng/uL  | % (Conc.) (ng/uL) | nmole/L | From (bp) | To (bp) | Avg. Size | CV%    |
|--------------|--------|-------------------|---------|-----------|---------|-----------|--------|
| 1 (LM)       | 0.0007 |                   | 0.5357  | 0         | 18      | 2         | 177.69 |
| 2            | 0.1135 | 86.6              | 1.3044  | 67        | 375     | 143       | 50.16  |
| 3            | 0.0107 | 8.2               | 0.0263  | 550       | 762     | 670       | 8.77   |
| 4            | 0.0069 | 5.2               | 0.0122  | 804       | 1428    | 926       | 12.23  |
| 5            | 0.0000 |                   | 0.0000  | 2518      | 9435    | 7040      | 18.10  |
| TIC:         |        | 0.1311            | ng/uL   |           |         |           |        |
| TIM:         |        | 1.3429            | nmole/L |           |         |           |        |
| Total Conc.: |        | 0.1599            | ng/uL   |           |         |           |        |

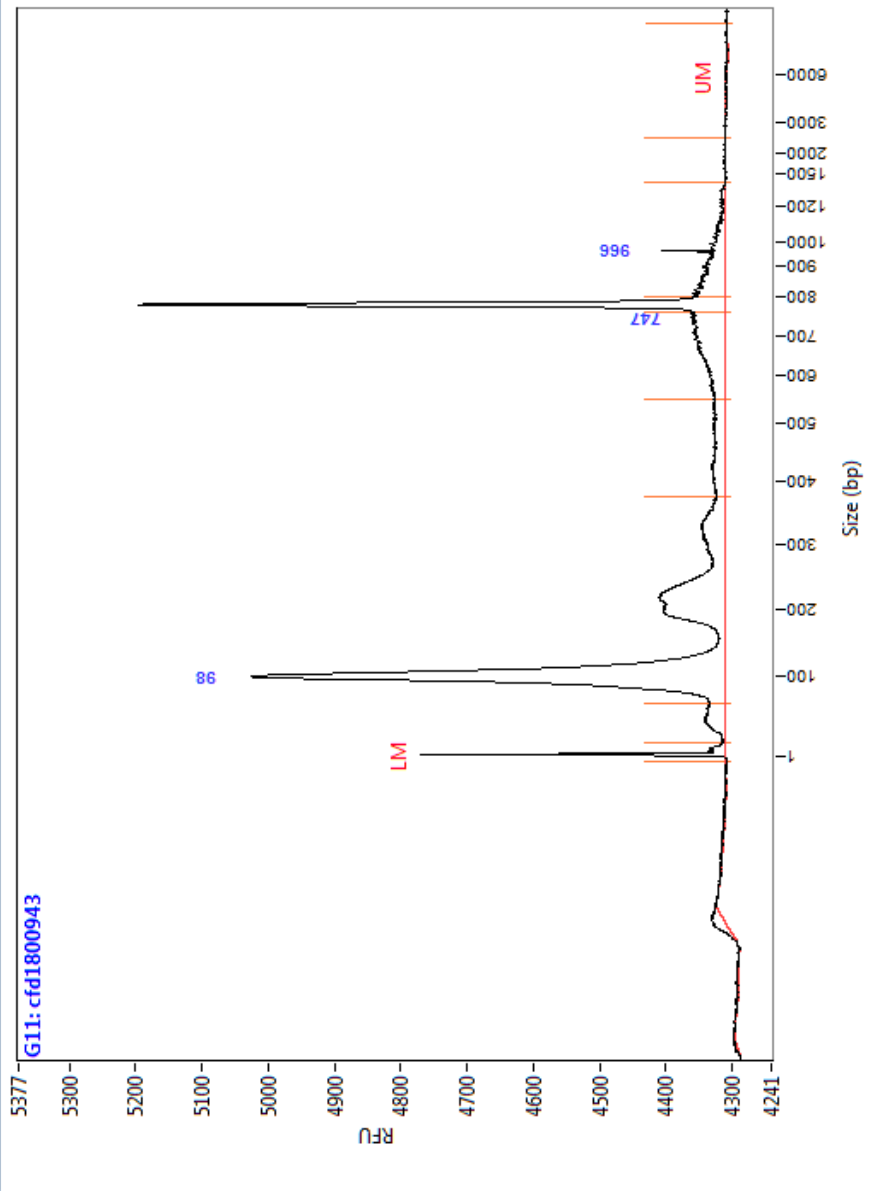

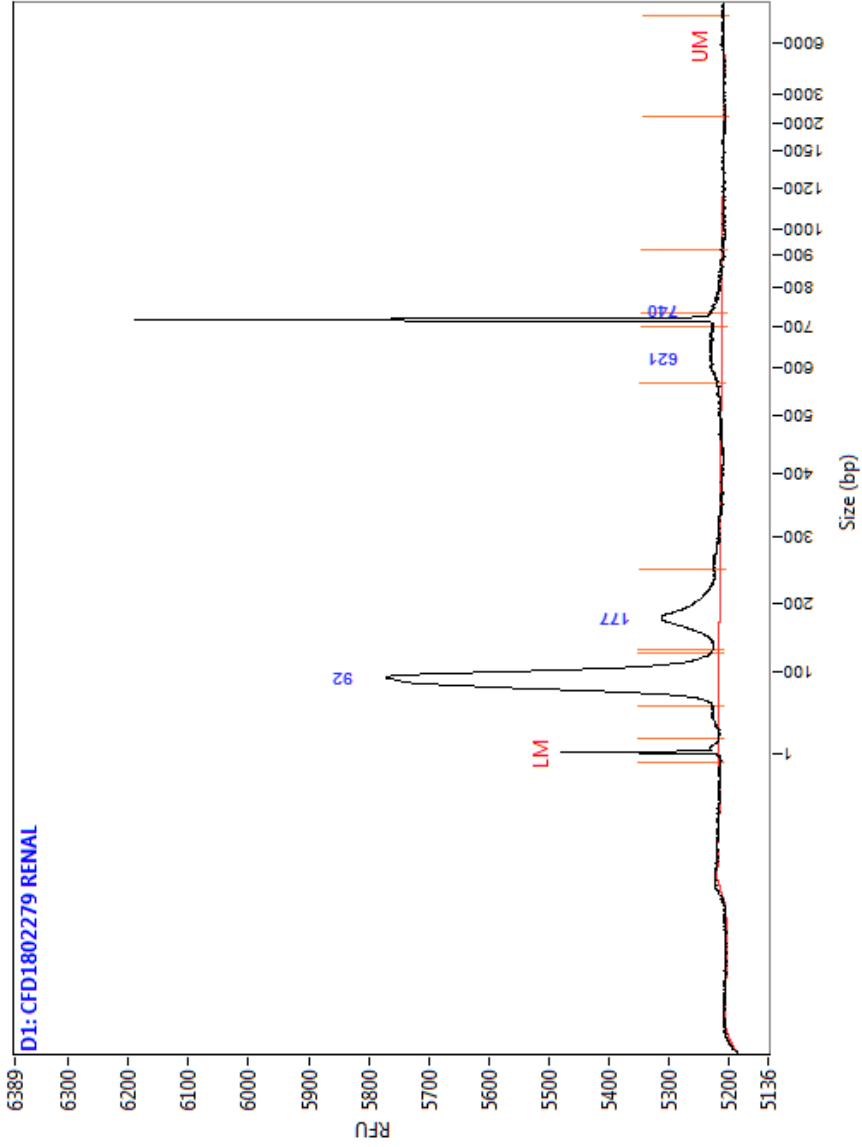

Peak Table

| Size (bp)    | ng/uL  | % (Conc.) (ng/uL) | nmole/L | From (bp) | To (bp) | Avg. Size | CV%    |
|--------------|--------|-------------------|---------|-----------|---------|-----------|--------|
| 1            | 0.0005 |                   | 0.3740  | 0         | 20      | 2         | 155.44 |
| 2            | 0.1042 | 79.4              | 1.9432  | 58        | 126     | 88        | 11.54  |
| 3            | 0.0216 | 16.5              | 0.1954  | 133       | 250     | 182       | 12.19  |
| 4            | 0.0040 | 3.1               | 0.0105  | 567       | 701     | 636       | 5.75   |
| 5            | 0.0014 | 1.1               | 0.0030  | 736       | 921     | 775       | 4.58   |
| 6            | 0.0000 |                   | 0.0000  | 2299      | 7683    | 5678      | 16.73  |
| TIC:         |        | 0.1312            | ng/uL   |           |         |           |        |
| TIM:         |        | 2.1520            | nmole/L |           |         |           |        |
| Total Conc.: |        | 0.1445            | ng/uL   |           |         |           |        |

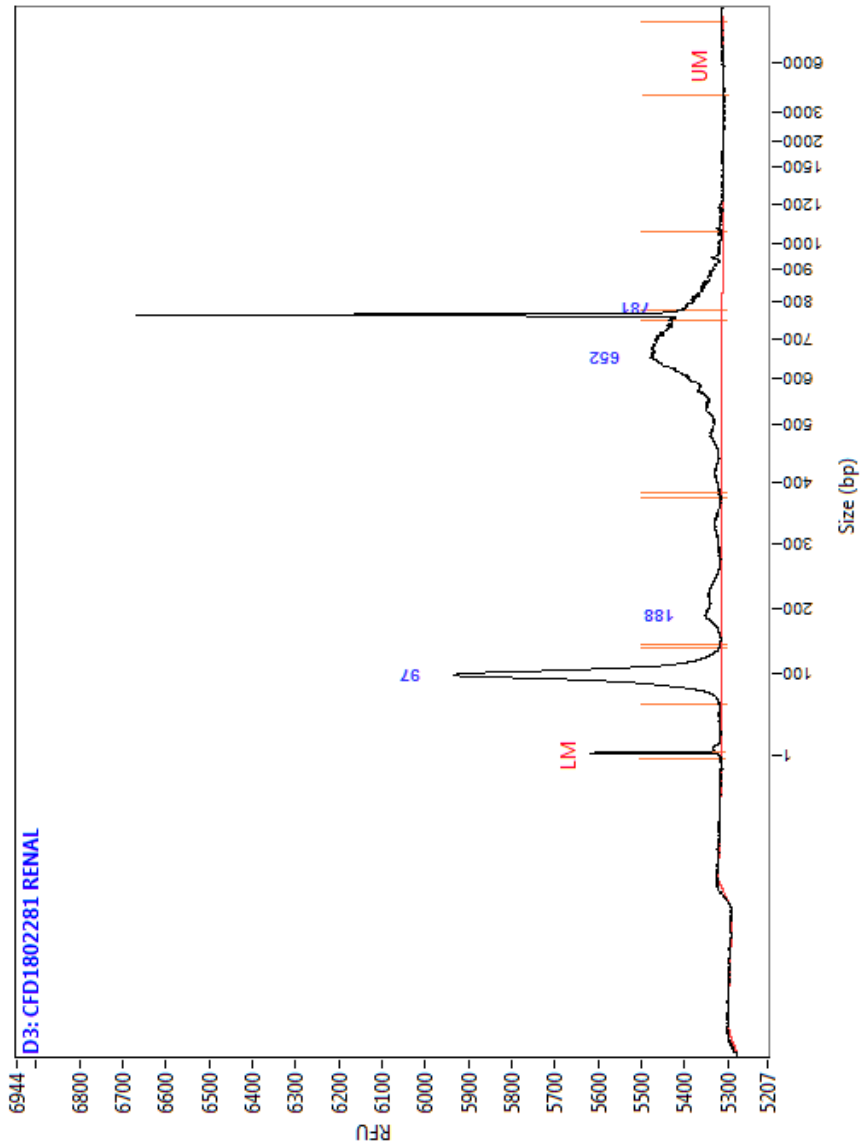

**Peak Table**

| Peak         | Size (bp) | ng/uL  | % (Conc.) (ng/uL) | nmole/L | From (bp) | To (bp) | Avg. Size | CV%    |
|--------------|-----------|--------|-------------------|---------|-----------|---------|-----------|--------|
| 1            | 1 (LM)    | 0.0005 |                   | 0.6708  | 0         | 4       | 1         | 153.77 |
| 2            | 97        | 0.0772 | 50.2              | 1.3067  | 62        | 138     | 97        | 10.18  |
| 3            | 188       | 0.0138 | 9.0               | 0.0965  | 146       | 376     | 235       | 23.57  |
| 4            | 652       | 0.0520 | 33.8              | 0.1350  | 384       | 750     | 634       | 12.99  |
| 5            | 781       | 0.0109 | 7.1               | 0.0213  | 776       | 1064    | 840       | 6.94   |
| 6            | 6000 (UM) | 0.0000 |                   | 0.0000  | 4146      | 8570    | 6877      | 13.91  |
| TIC:         |           | 0.1539 | ng/uL             |         |           |         |           |        |
| TIM:         |           | 1.5596 | nmole/L           |         |           |         |           |        |
| Total Conc.: |           | 0.1721 | ng/uL             |         |           |         |           |        |

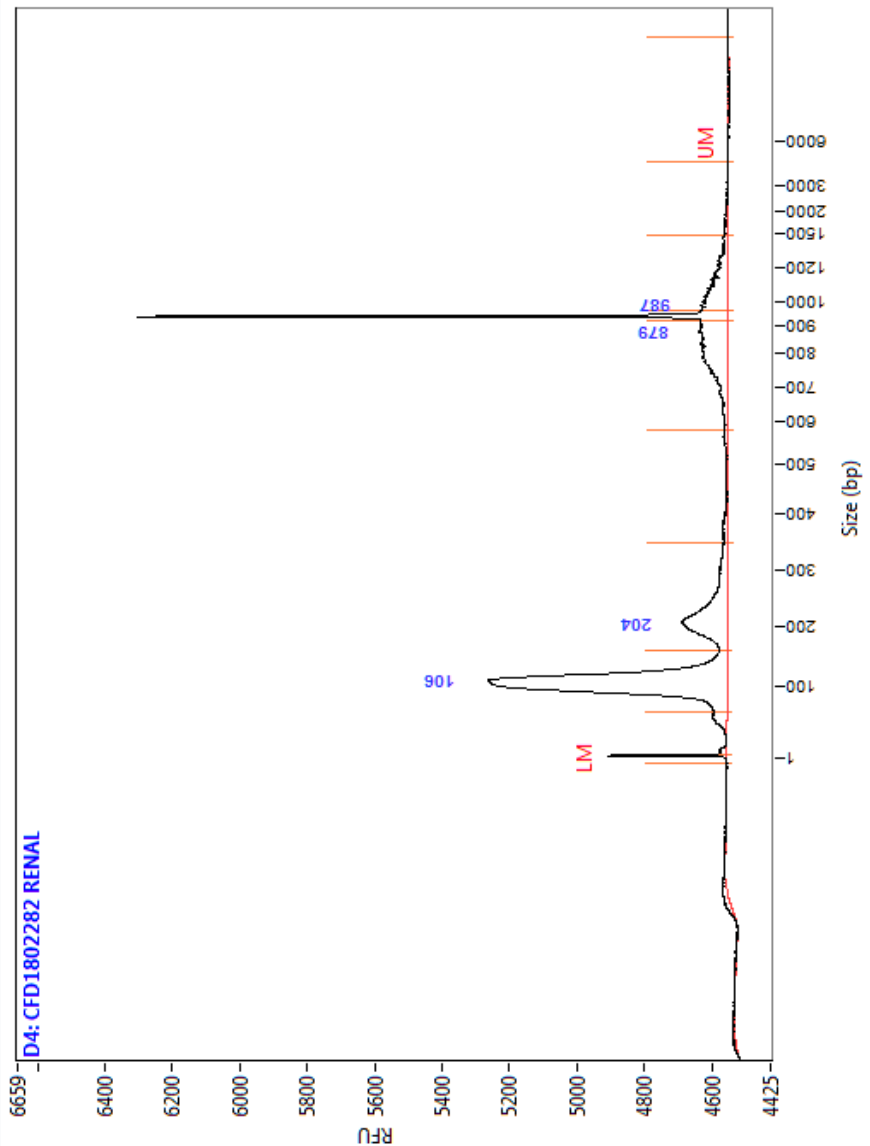

**Peak Table**

| Size (bp)                 | ng/uL  | % (Conc.) (ng/uL) | nmole/L | From (bp) | To (bp) | Avg. Size | CV%    |
|---------------------------|--------|-------------------|---------|-----------|---------|-----------|--------|
| 1 (LM)                    | 0.0005 |                   | 0.6708  | 0         | 5       | 1         | 197.16 |
| 2                         | 0.1199 | 65.4              | 1.9110  | 64        | 158     | 103       | 14.36  |
| 3                         | 0.0335 | 18.3              | 0.2472  | 160       | 350     | 223       | 18.16  |
| 4                         | 0.0195 | 10.6              | 0.0403  | 581       | 920     | 797       | 10.03  |
| 5                         | 0.0105 | 5.7               | 0.0156  | 965       | 1497    | 1107      | 11.37  |
| 6                         | 0.0000 |                   | 0.0000  | 4649      | 13164   | 9402      | 34.07  |
| TIC: 0.1834 ng/uL         |        |                   |         |           |         |           |        |
| TIM: 2.2141 nmole/L       |        |                   |         |           |         |           |        |
| Total Conc.: 0.2094 ng/uL |        |                   |         |           |         |           |        |



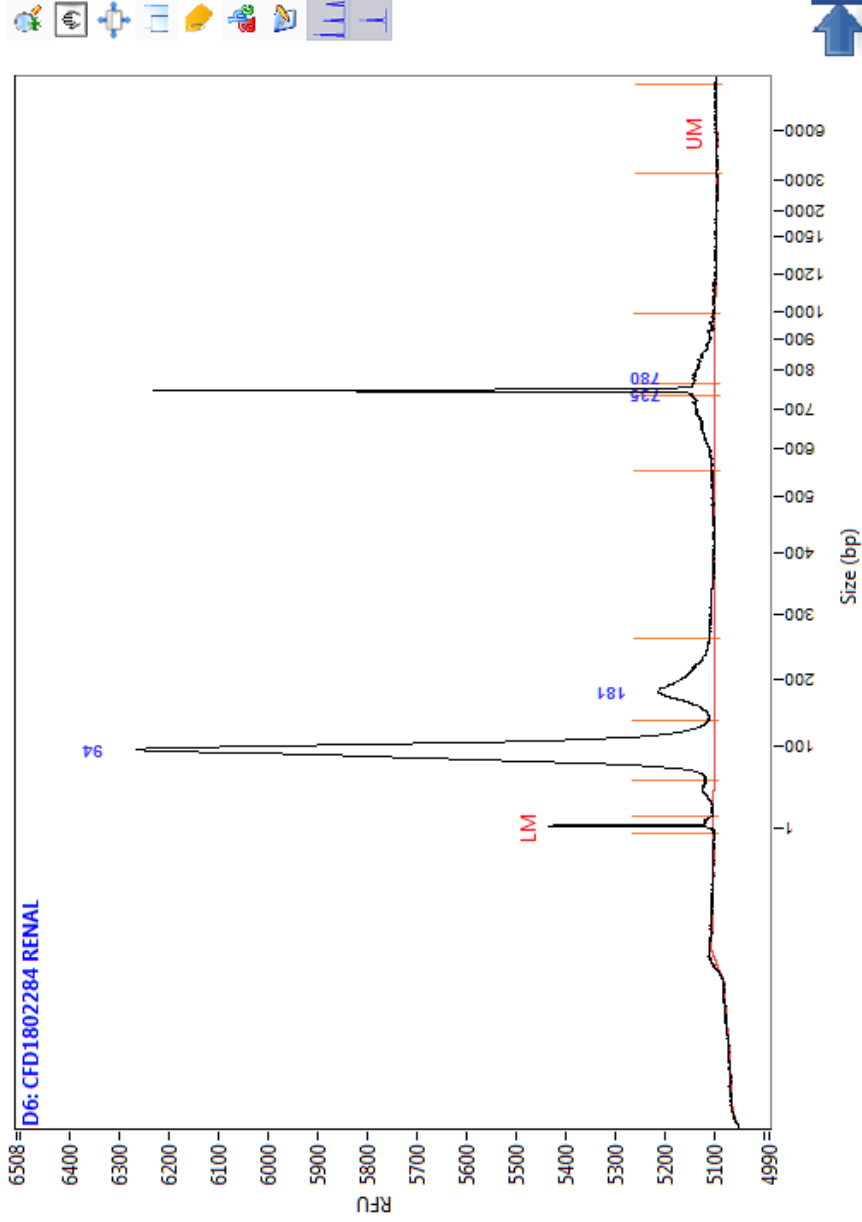

Peak Table

| Size (bp)    | ng/uL       | % (Conc.) (ng/uL) | nmole/L | From (bp) | To (bp) | Avg. Size | CV%    |
|--------------|-------------|-------------------|---------|-----------|---------|-----------|--------|
| 1 (LM)       | 0.0005      |                   | 0.3740  | 0         | 14      | 2         | 166.91 |
| 2            | 0.1357      | 80.9              | 2.3960  | 59        | 139     | 93        | 11.29  |
| 3            | 0.0210      | 12.5              | 0.1808  | 140       | 265     | 191       | 12.82  |
| 4            | 0.0061      | 3.6               | 0.0150  | 553       | 736     | 670       | 6.94   |
| 5            | 0.0050      | 3.0               | 0.0099  | 766       | 999     | 829       | 6.24   |
| 6            | 0.0000 (UM) |                   | 0.0000  | 3505      | 8888    | 7012      | 17.14  |
| TIC:         | 0.1678      | ng/uL             |         |           |         |           |        |
| TIM:         | 2.6017      | nmole/L           |         |           |         |           |        |
| Total Conc.: | 0.1832      | ng/uL             |         |           |         |           |        |

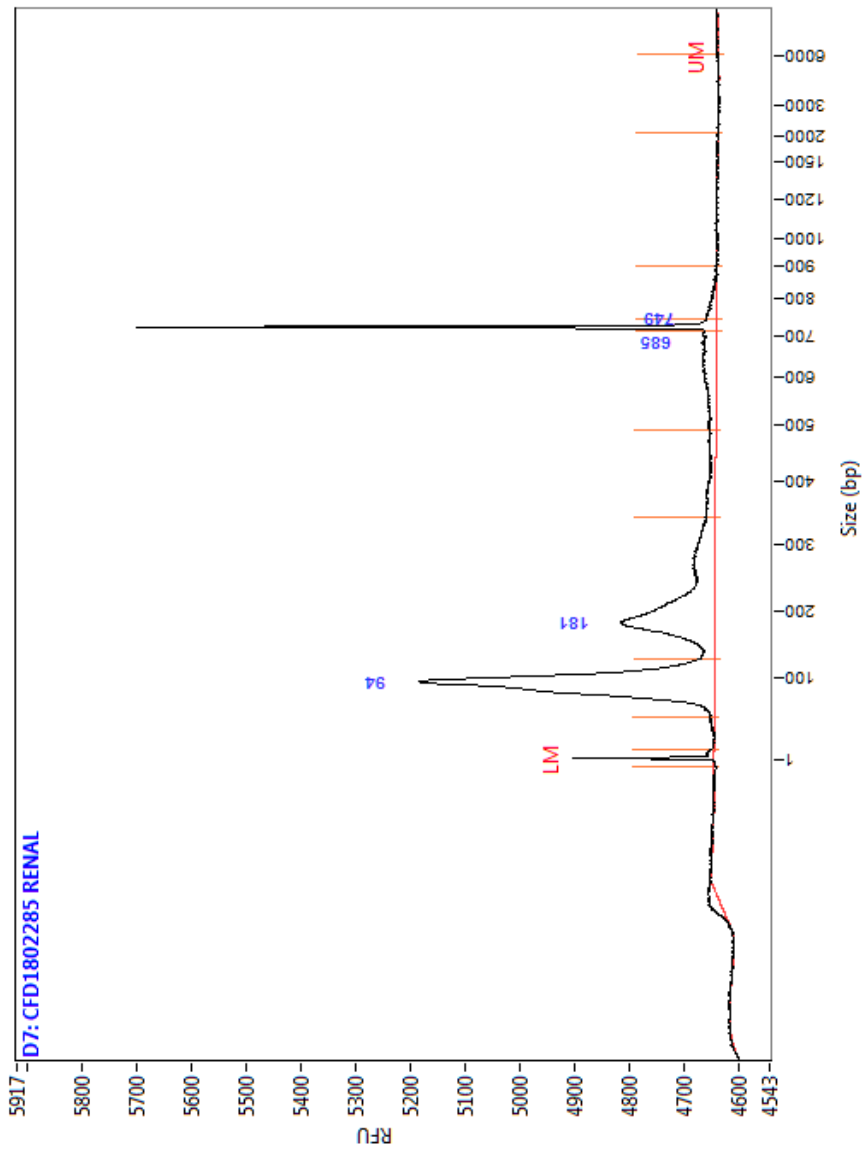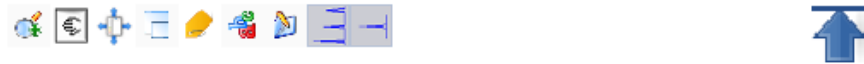

Peak Table

| Peak         | Size (bp) | ng/uL  | % (Conc.) (ng/uL) | nmole/L | From (bp) | To (bp) | Avg. Size | CV%    |
|--------------|-----------|--------|-------------------|---------|-----------|---------|-----------|--------|
| 1            | 1 (LM)    | 0.0005 |                   | 0.6708  | 0         | 14      | 1         | 182.66 |
| 2            | 94        | 0.0972 | 58.8              | 1.7537  | 53        | 128     | 91        | 12.92  |
| 3            | 181       | 0.0582 | 35.2              | 0.4579  | 129       | 344     | 209       | 23.21  |
| 4            | 685       | 0.0084 | 5.1               | 0.0226  | 489       | 715     | 611       | 10.25  |
| 5            | 749       | 0.0016 | 1.0               | 0.0034  | 746       | 900     | 783       | 3.96   |
| 6            | 6000 (UM) | 0.0000 |                   | 0.0000  | 2118      | 6136    | 5549      | 10.19  |
| TIC:         |           | 0.1655 | ng/uL             |         |           |         |           |        |
| TIM:         |           | 2.2377 | nmole/L           |         |           |         |           |        |
| Total Conc.: |           | 0.1828 | ng/uL             |         |           |         |           |        |

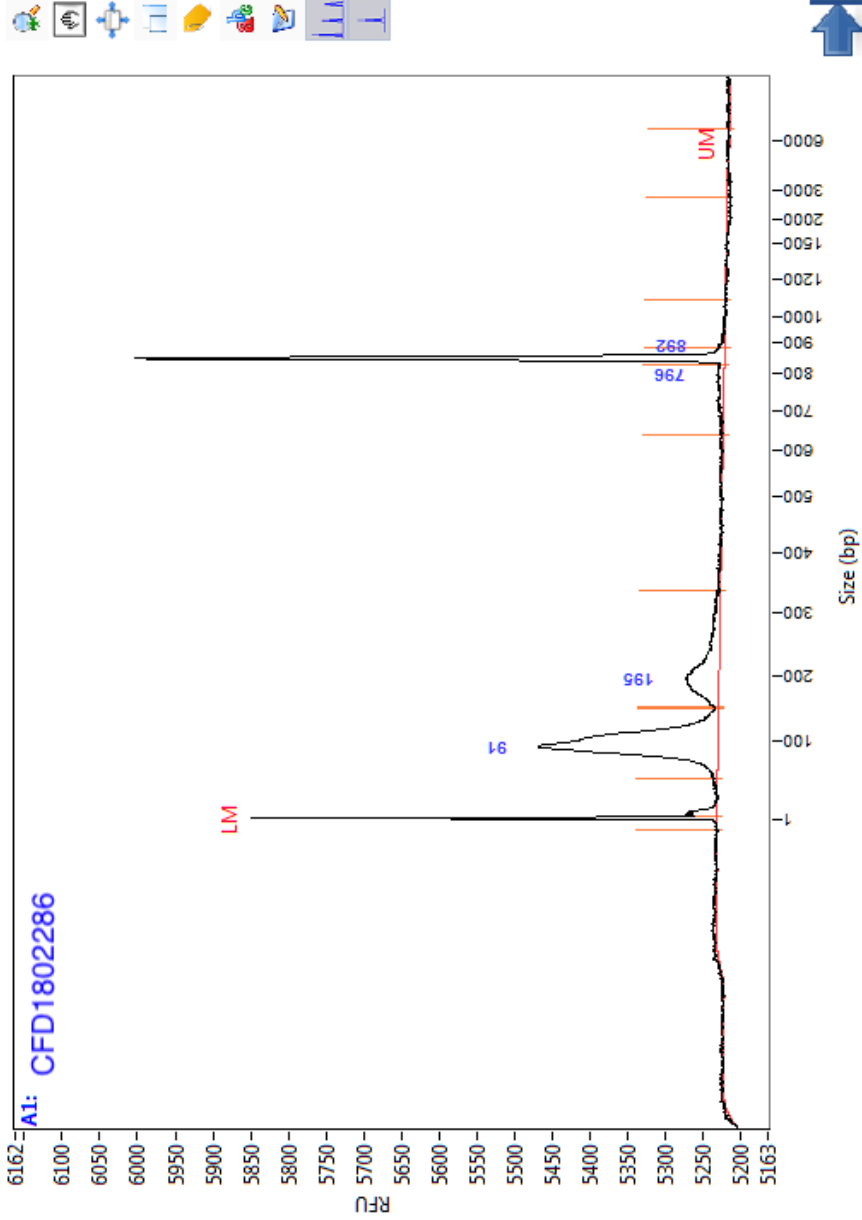

**Peak Table**

| Size (bp)    | ng/uL       | % (Conc.) (ng/uL) | nmole/L | From (bp) | To (bp) | Avg. Size | CV%    |
|--------------|-------------|-------------------|---------|-----------|---------|-----------|--------|
| 1 (LM)       | 0.0011      |                   | 1.4680  | 0         | 5       | 1         | 148.28 |
| 2            | 0.0522      | 75.8              | 0.8930  | 54        | 151     | 96        | 15.20  |
| 3            | 0.0149      | 21.7              | 0.1162  | 154       | 336     | 211       | 18.55  |
| 4            | 0.0015      | 2.2               | 0.0033  | 639       | 829     | 754       | 6.14   |
| 5            | 0.0002      | 0.3               | 0.0004  | 886       | 1097    | 914       | 3.24   |
| 6            | 0.0000 (UM) |                   | 0.0000  | 2788      | 6846    | 6072      | 5.68   |
| TIC:         |             | 0.0689            | ng/uL   |           |         |           |        |
| TIM:         |             | 1.0130            | nmole/L |           |         |           |        |
| Total Conc.: |             | 0.0879            | ng/uL   |           |         |           |        |

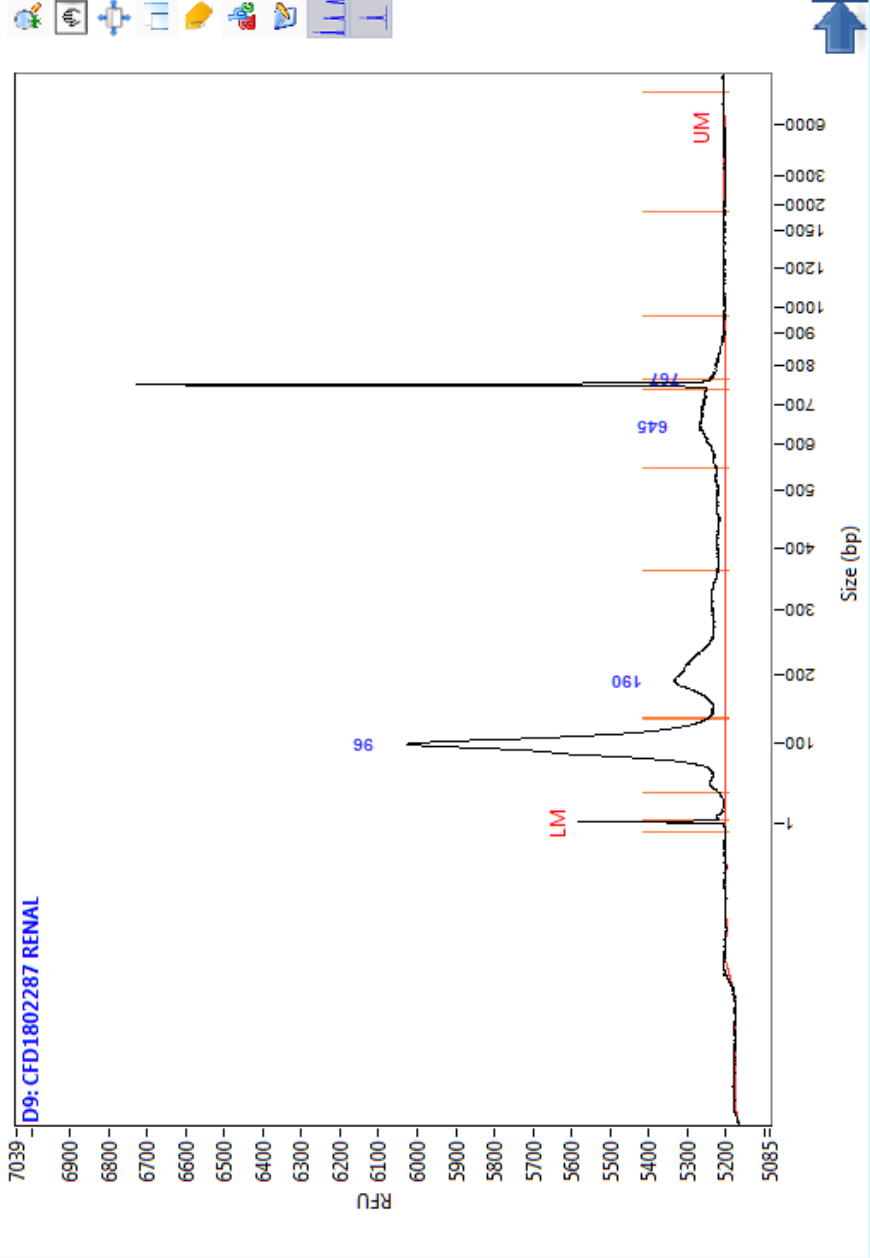

**Peak Table**

| Size (bp)                 | ng/uL  | % (Conc.) (ng/uL) | nmole/L | From (bp) | To (bp) | Avg. Size | CV%    |
|---------------------------|--------|-------------------|---------|-----------|---------|-----------|--------|
| 1 (LM)                    | 0.0005 |                   | 0.6708  | 0         | 5       | 1         | 186.93 |
| 96                        | 0.1164 | 66.3              | 2.0332  | 39        | 136     | 94        | 16.13  |
| 190                       | 0.0429 | 24.4              | 0.3164  | 136       | 366     | 223       | 24.34  |
| 645                       | 0.0138 | 7.8               | 0.0349  | 548       | 739     | 650       | 7.79   |
| 767                       | 0.0024 | 1.4               | 0.0049  | 765       | 969     | 807       | 4.13   |
| 6000 (UM)                 | 0.0000 |                   | 0.0000  | 1896      | 8070    | 6332      | 12.54  |
| TIC: 0.1755 ng/uL         |        |                   |         |           |         |           |        |
| TIM: 2.3893 nmole/L       |        |                   |         |           |         |           |        |
| Total Conc.: 0.1966 ng/uL |        |                   |         |           |         |           |        |

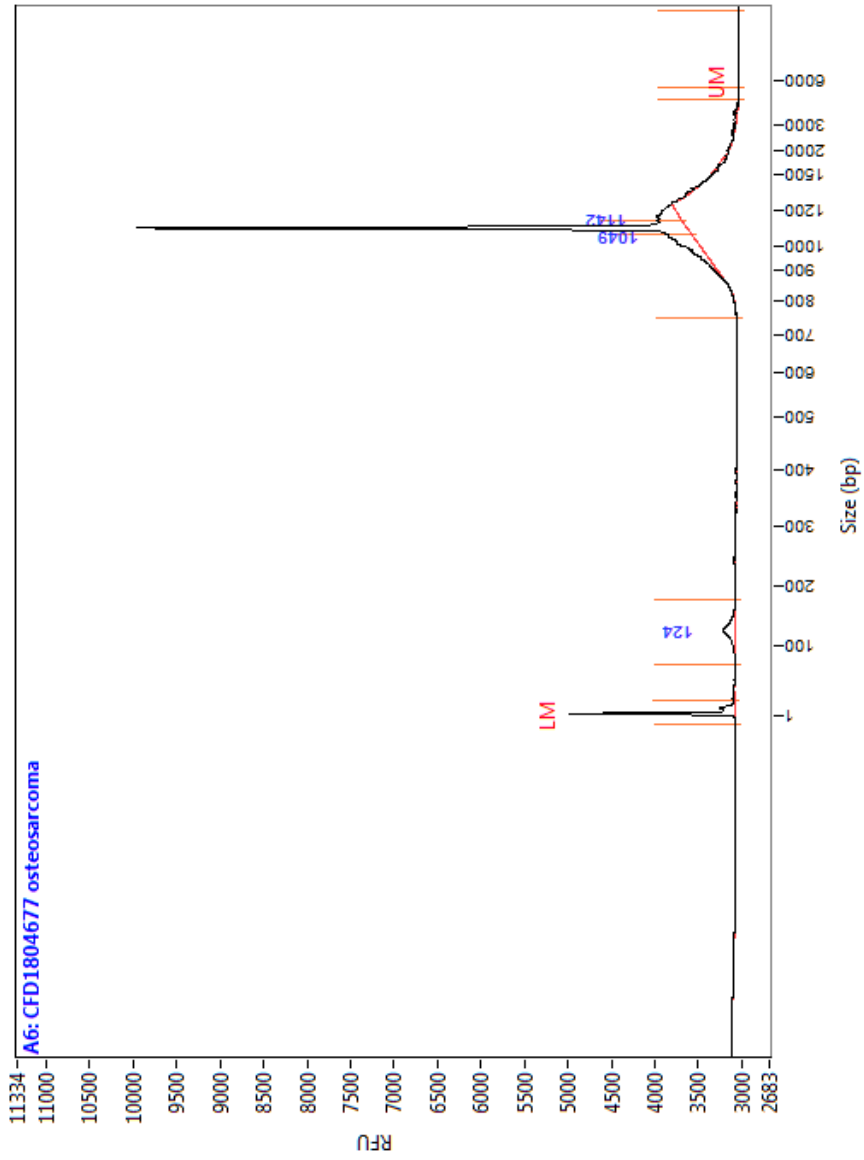

**Peak Table**

| Peak         | Size (bp) | ng/uL  | % (Conc.) (ng/uL) | nmole/L | From (bp) | To (bp) | Avg. Size | CV%    |
|--------------|-----------|--------|-------------------|---------|-----------|---------|-----------|--------|
| 1            | 1 (LM)    | 0.0004 |                   | 0.3273  | 0         | 23      | 2         | 191.97 |
| 2            | 124       | 0.0018 | 32.3              | 0.0235  | 74        | 176     | 123       | 11.58  |
| 3            | 1049      | 0.0022 | 41.1              | 0.0037  | 751       | 1066    | 996       | 5.17   |
| 4            | 1142      | 0.0014 | 26.6              | 0.0016  | 1142      | 4788    | 1526      | 52.07  |
| 5            | 6000 (UM) | 0.0000 |                   | 0.0000  | 5576      | 10718   | 7212      | 18.07  |
| TIC:         |           | 0.0054 | ng/uL             |         |           |         |           |        |
| TIM:         |           | 0.0288 | nmole/L           |         |           |         |           |        |
| Total Conc.: |           | 0.0138 | ng/uL             |         |           |         |           |        |

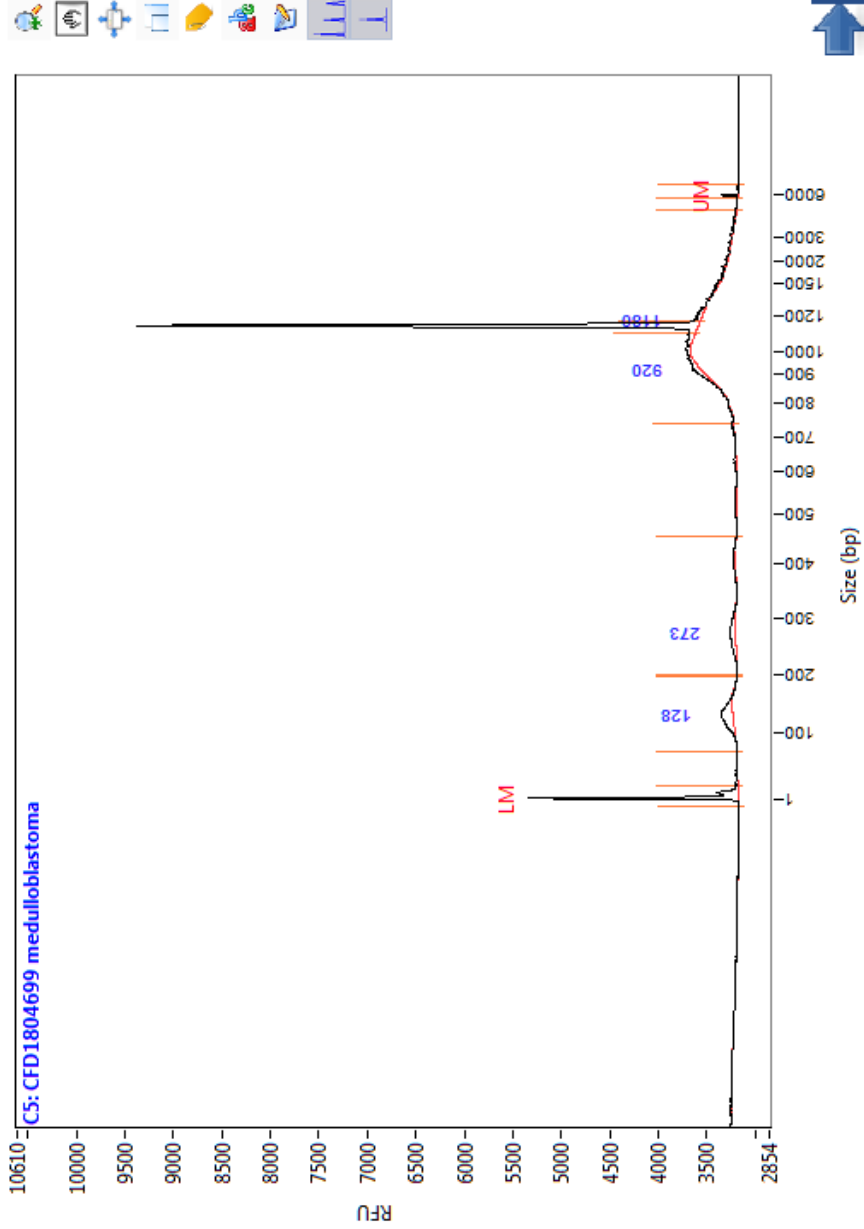

**Peak Table**

| Size (bp)                 | ng/uL       | % (Conc.) (ng/uL) | nmole/L | From (bp) | To (bp) | Avg. Size | CV%    |
|---------------------------|-------------|-------------------|---------|-----------|---------|-----------|--------|
| 1 (LM)                    | 0.0004      |                   | 0.3108  | 0         | 21      | 2         | 209.34 |
| 2                         | 0.0016      | 40.7              | 0.0219  | 72        | 196     | 123       | 11.29  |
| 3                         | 0.0010      | 25.2              | 0.0059  | 202       | 455     | 285       | 17.21  |
| 4                         | 0.0009      | 21.7              | 0.0015  | 738       | 1108    | 964       | 8.56   |
| 5                         | 0.0005      | 12.5              | 0.0004  | 1180      | 4938    | 1925      | 51.65  |
| 6                         | 0.0000 (UM) |                   | 0.0000  | 5875      | 6743    | 6026      | 3.06   |
| TIC: 0.0040 ng/uL         |             |                   |         |           |         |           |        |
| TIM: 0.0297 nmole/L       |             |                   |         |           |         |           |        |
| Total Conc.: 0.0102 ng/uL |             |                   |         |           |         |           |        |

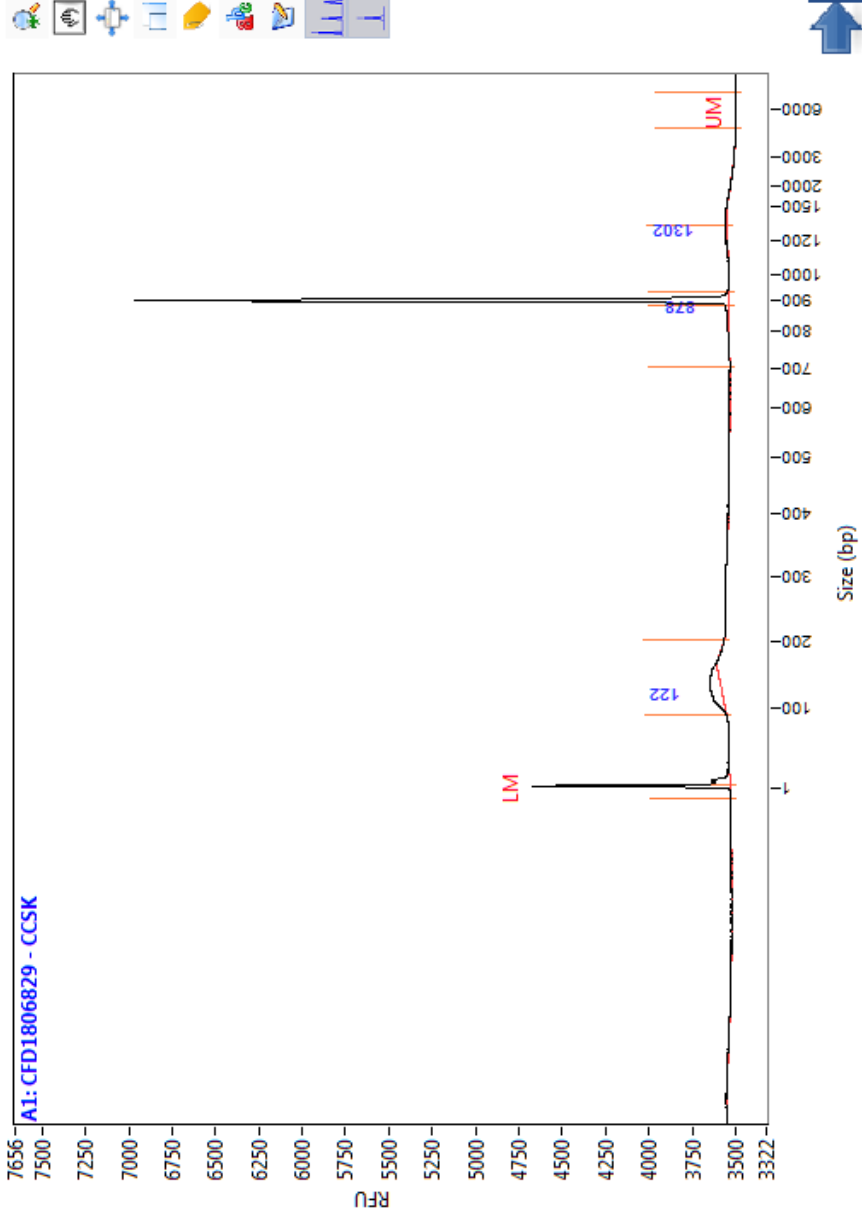

**Peak Table**

| Size (bp)    | ng/uL       | % (Conc.) (ng/uL) | nmole/L | From (bp) | To (bp) | Avg. Size | CV%    |
|--------------|-------------|-------------------|---------|-----------|---------|-----------|--------|
| 1 (LM)       | 0.0007      |                   | 0.9609  | 0         | 6       | 1         | 135.64 |
| 2            | 0.0050      | 86.6              | 0.0640  | 93        | 204     | 128       | 12.95  |
| 3            | 0.0004      | 7.5               | 0.0008  | 706       | 885     | 838       | 4.77   |
| 4            | 0.0003      | 5.9               | 0.0005  | 937       | 1344    | 1192      | 10.17  |
| 5            | 0.0000 (UM) |                   | 0.0000  | 4878      | 7228    | 6163      | 7.88   |
| TIC:         |             | ng/uL             |         |           |         |           |        |
| TIM:         |             | nmole/L           |         |           |         |           |        |
| Total Conc.: |             | ng/uL             |         |           |         |           |        |

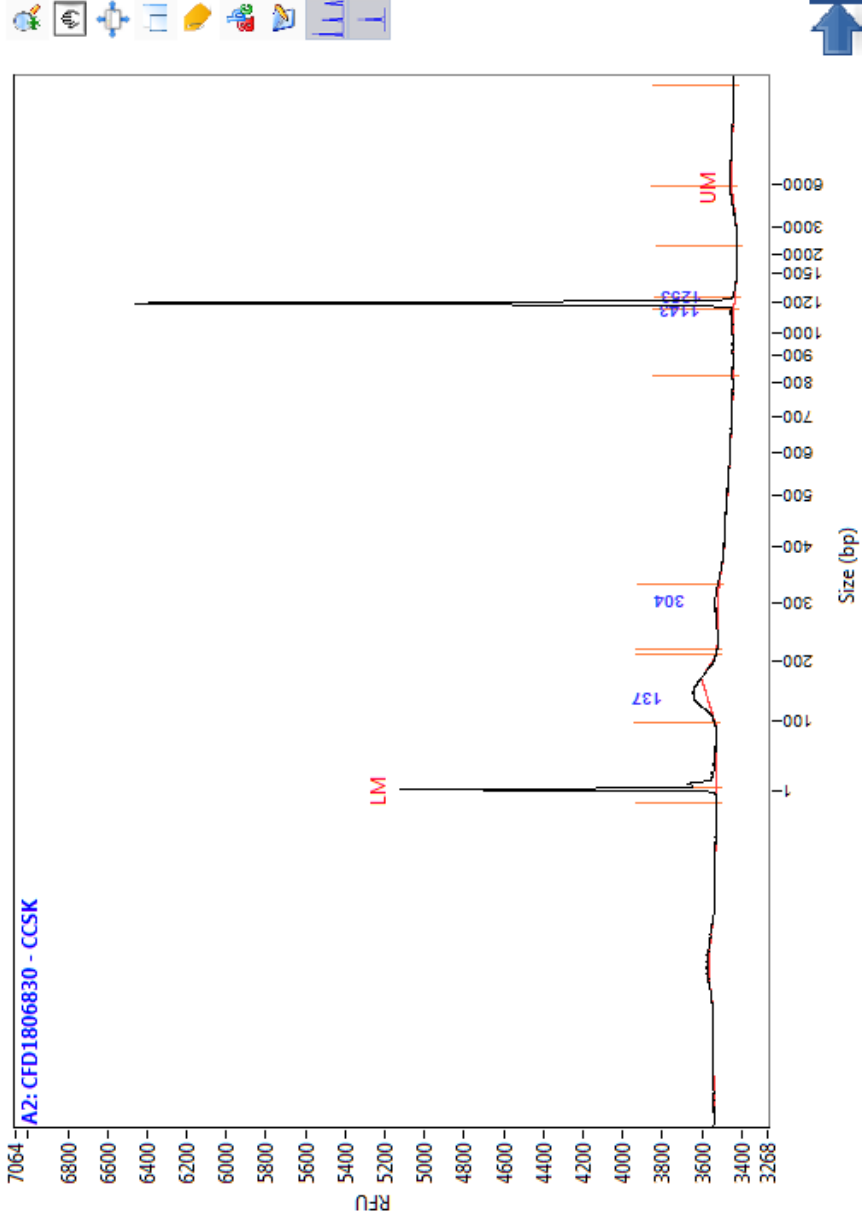

**Peak Table**

| Size (bp)    | ng/uL       | % (Conc.) (ng/uL) | nmole/L | From (bp) | To (bp) | Avg. Size | CV%    |
|--------------|-------------|-------------------|---------|-----------|---------|-----------|--------|
| 1 (LM)       | 0.0007      |                   | 0.9609  | 0         | 6       | 1         | 164.93 |
| 2            | 0.0027      | 73.0              | 0.0322  | 98        | 212     | 137       | 10.14  |
| 3            | 0.0007      | 19.1              | 0.0039  | 219       | 335     | 295       | 6.75   |
| 4            | 0.0002      | 6.1               | 0.0004  | 826       | 1161    | 1027      | 11.02  |
| 5            | 0.0001      | 1.7               | 0.0001  | 1253      | 2318    | 1378      | 13.61  |
| 6            | 0.0000 (UM) |                   | 0.0000  | 6000      | 13301   | 7163      | 22.08  |
| TIC:         |             | ng/uL             |         |           |         |           |        |
| TIM:         |             | nmole/L           |         |           |         |           |        |
| Total Conc.: |             | ng/uL             |         |           |         |           |        |





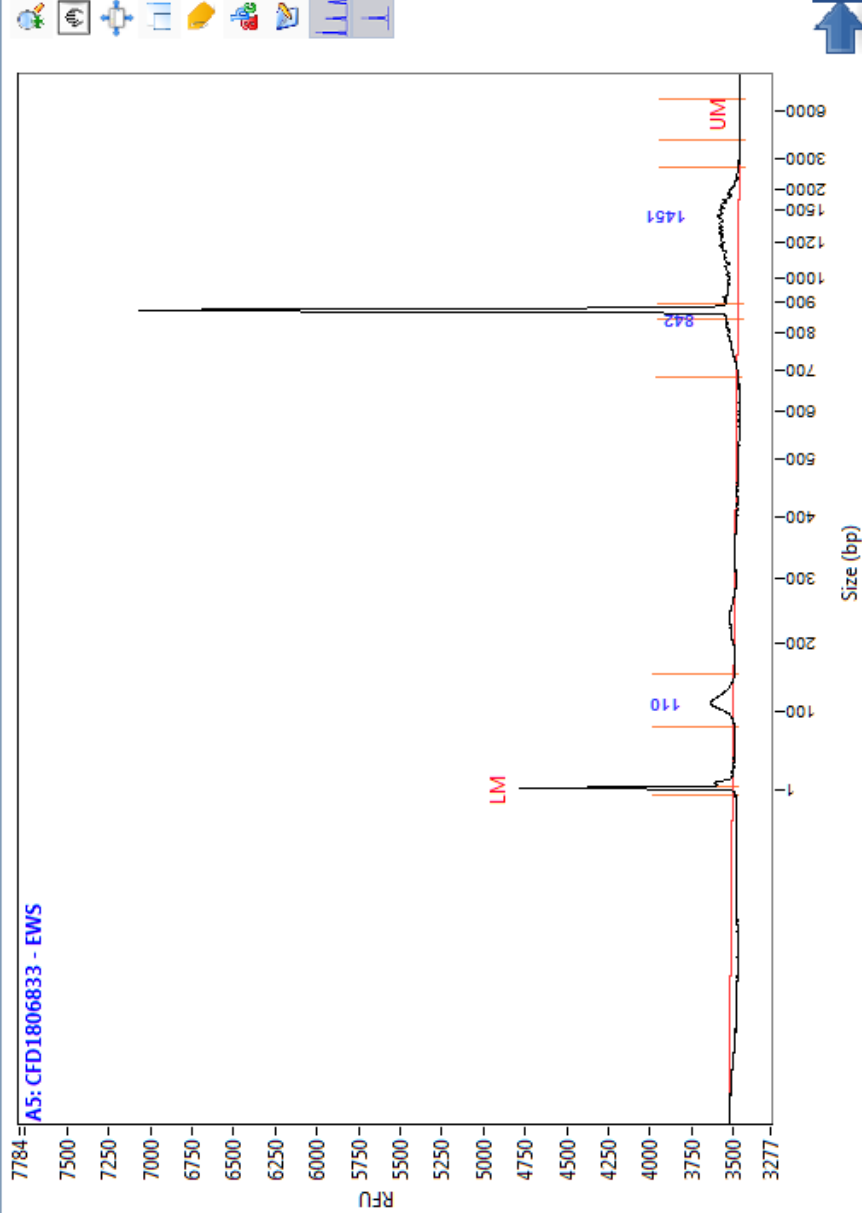

**Peak Table**

| Peak         | Size (bp) | ng/uL  | % (Conc.) (ng/uL) | nmole/L | From (bp) | To (bp) | Avg. Size | CV%    |
|--------------|-----------|--------|-------------------|---------|-----------|---------|-----------|--------|
| 1            | 1 (LM)    | 0.0007 |                   | 0.9609  | 0         | 5       | 1         | 117.16 |
| 2            | 110       | 0.0052 | 29.3              | 0.0764  | 80        | 154     | 112       | 9.47   |
| 3            | 842       | 0.0022 | 12.2              | 0.0045  | 685       | 847     | 796       | 4.22   |
| 4            | 1451      | 0.0104 | 58.5              | 0.0131  | 897       | 2741    | 1304      | 24.68  |
| 5            | 6000 (UM) | 0.0000 |                   | 0.0000  | 4260      | 6933    | 5536      | 11.45  |
| TIC:         |           | 0.0178 | ng/uL             |         |           |         |           |        |
| TIM:         |           | 0.0940 | nmole/L           |         |           |         |           |        |
| Total Conc.: |           | 0.0362 | ng/uL             |         |           |         |           |        |

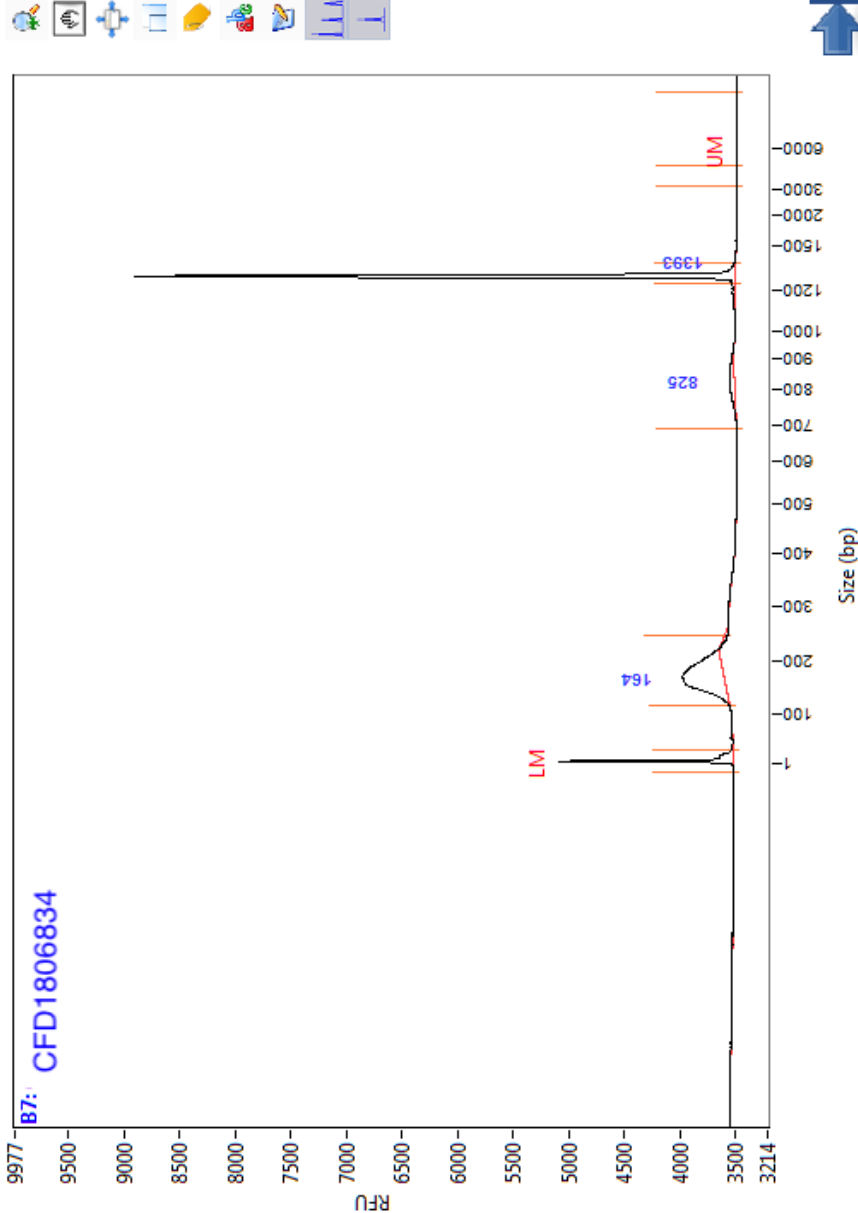

**Peak Table**

| Size (bp)    | ng/uL  | % (Conc.) (ng/uL) | nmole/L | From (bp) | To (bp) | Avg. Size | CV%    |
|--------------|--------|-------------------|---------|-----------|---------|-----------|--------|
| 1 (LM)       | 0.0013 |                   | 0.9492  | 0         | 26      | 2         | 227.41 |
| 2            | 0.0314 | 89.7              | 0.3094  | 116       | 245     | 167       | 12.37  |
| 3            | 0.0035 | 10.1              | 0.0065  | 692       | 1252    | 891       | 17.00  |
| 4            | 0.0001 | 0.3               | 0.0001  | 1393      | 3304    | 1720      | 21.18  |
| 5            | 0.0000 |                   | 0.0000  | 4819      | 10183   | 7507      | 19.48  |
| TIC:         |        | ng/uL             |         |           |         |           |        |
| TIM:         |        | nmole/L           |         |           |         |           |        |
| Total Conc.: |        | ng/uL             |         |           |         |           |        |

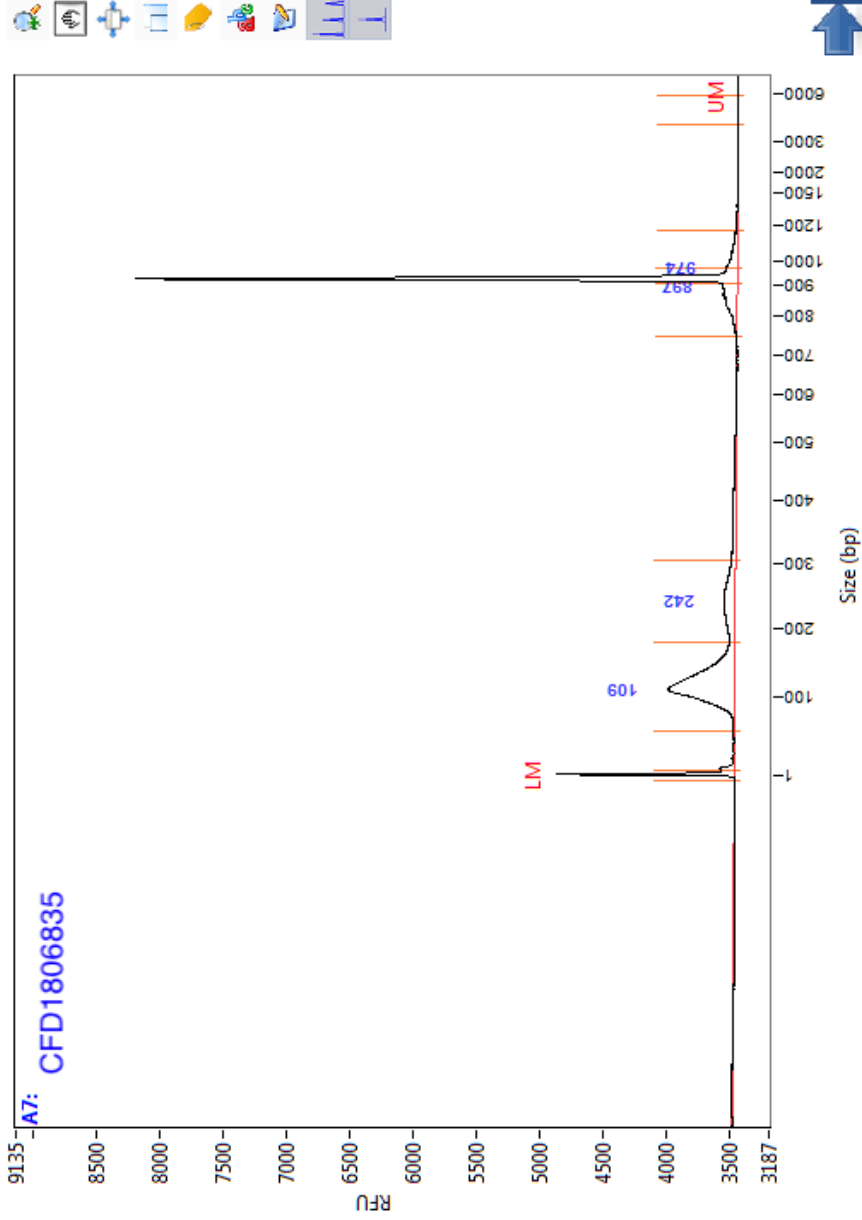

**Peak Table**

| Size (bp)    | ng/uL       | % (Conc.) (ng/uL) | nmole/L | From (bp) | To (bp) | Avg. Size | CV%    |
|--------------|-------------|-------------------|---------|-----------|---------|-----------|--------|
| 1 (LM)       | 0.0007      |                   | 0.9609  | 0         | 7       | 1         | 180.54 |
| 2            | 0.0322      | 71.1              | 0.4521  | 57        | 181     | 117       | 18.58  |
| 3            | 0.0083      | 18.3              | 0.0569  | 181       | 306     | 240       | 13.24  |
| 4            | 0.0033      | 7.3               | 0.0064  | 750       | 911     | 853       | 4.53   |
| 5            | 0.0014      | 3.2               | 0.0023  | 974       | 1180    | 1041      | 5.34   |
| 6            | 0.0000 (UM) |                   | 0.0000  | 4146      | 6023    | 5940      | 2.40   |
| TIC:         |             | 0.0453            | ng/uL   |           |         |           |        |
| TIM:         |             | 0.5177            | nmole/L |           |         |           |        |
| Total Conc.: |             | 0.0665            | ng/uL   |           |         |           |        |

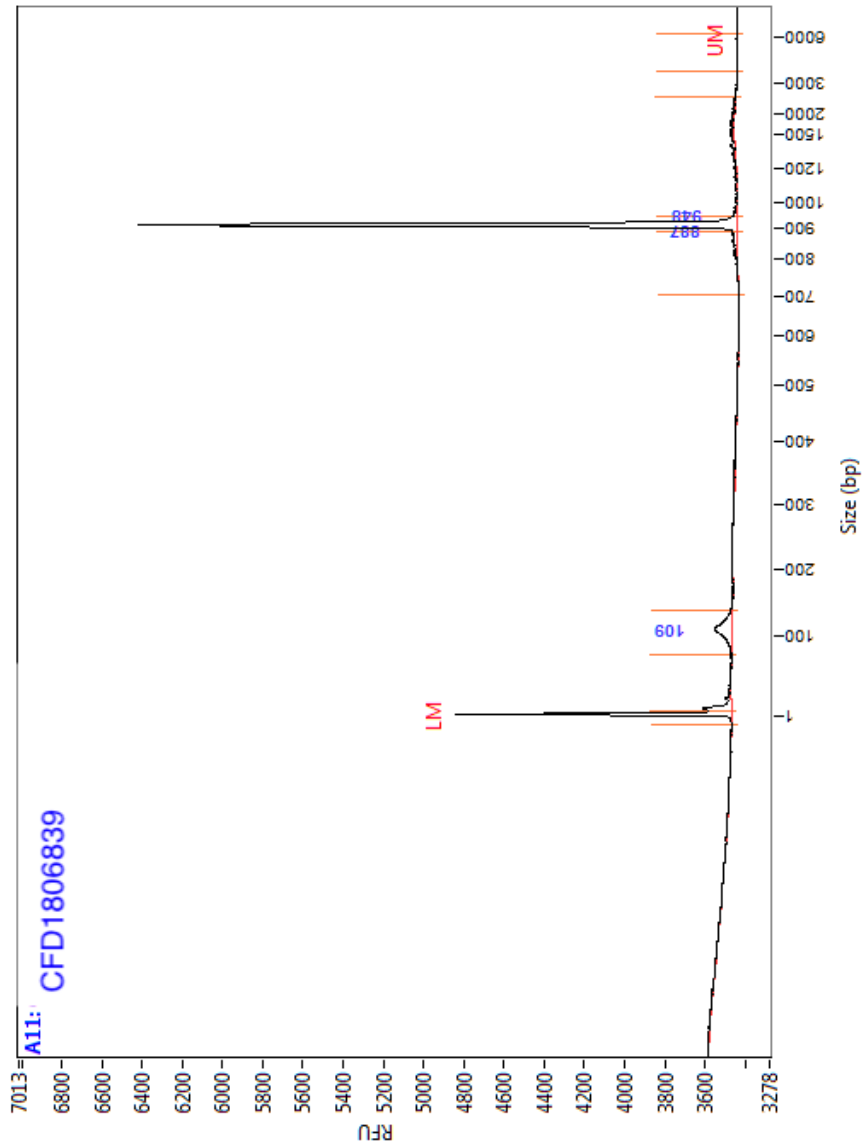

**Peak Table**

| Size (bp)    | ng/uL  | % (Conc.) (ng/uL) | nmole/L | From (bp) | To (bp) | Avg. Size | CV%    |
|--------------|--------|-------------------|---------|-----------|---------|-----------|--------|
| 1 (LM)       | 0.0007 |                   | 0.9609  | 0         | 7       | 1         | 137.00 |
| 2            | 0.0027 | 67.8              | 0.0406  | 78        | 140     | 109       | 10.53  |
| 3            | 0.0005 | 11.6              | 0.0009  | 705       | 888     | 840       | 4.76   |
| 4            | 0.0008 | 20.6              | 0.0009  | 948       | 2612    | 1432      | 28.15  |
| 5            | 0.0000 |                   | 0.0000  | 3871      | 6318    | 5709      | 8.92   |
| TIC:         |        | ng/uL             |         |           |         |           |        |
| TIM:         |        | nmole/L           |         |           |         |           |        |
| Total Conc.: |        | ng/uL             |         |           |         |           |        |

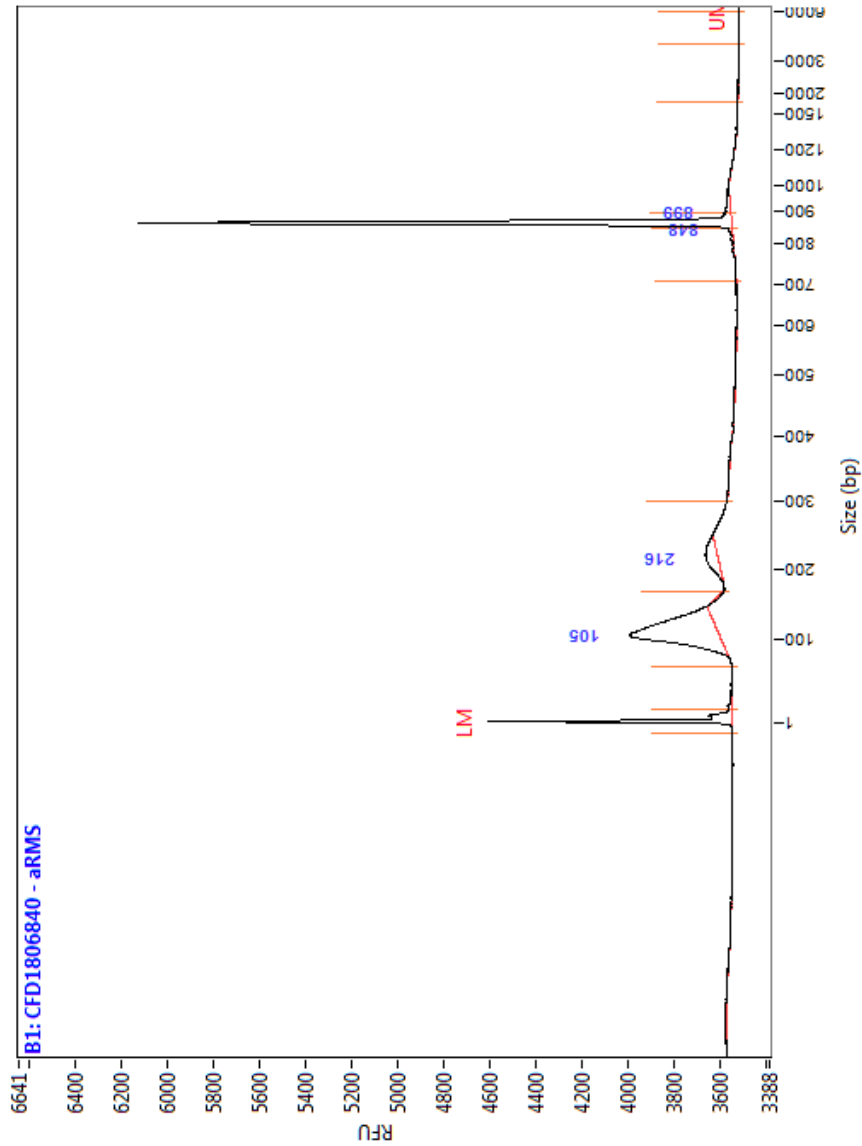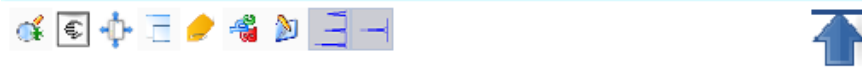

Peak Table

| Size (bp)    | ng/uL       | % (Conc.) (ng/uL) | nmole/L | From (bp) | To (bp) | Avg. Size | CV%    |
|--------------|-------------|-------------------|---------|-----------|---------|-----------|--------|
| 1 (LM)       | 0.0007      |                   | 0.5357  | 0         | 18      | 2         | 180.03 |
| 2            | 0.0189      | 86.0              | 0.2824  | 68        | 170     | 110       | 12.21  |
| 3            | 0.0025      | 11.6              | 0.0194  | 168       | 303     | 216       | 6.94   |
| 4            | 0.0002      | 1.0               | 0.0004  | 708       | 850     | 812       | 4.32   |
| 5            | 0.0003      | 1.5               | 0.0006  | 899       | 1816    | 959       | 12.41  |
| 6            | 0.0000 (UM) |                   | 0.0000  | 4123      | 6136    | 5413      | 10.94  |
| TIC:         |             | 0.0220            | ng/uL   |           |         |           |        |
| TIM:         |             | 0.3028            | nmole/L |           |         |           |        |
| Total Conc.: |             | 0.0329            | ng/uL   |           |         |           |        |



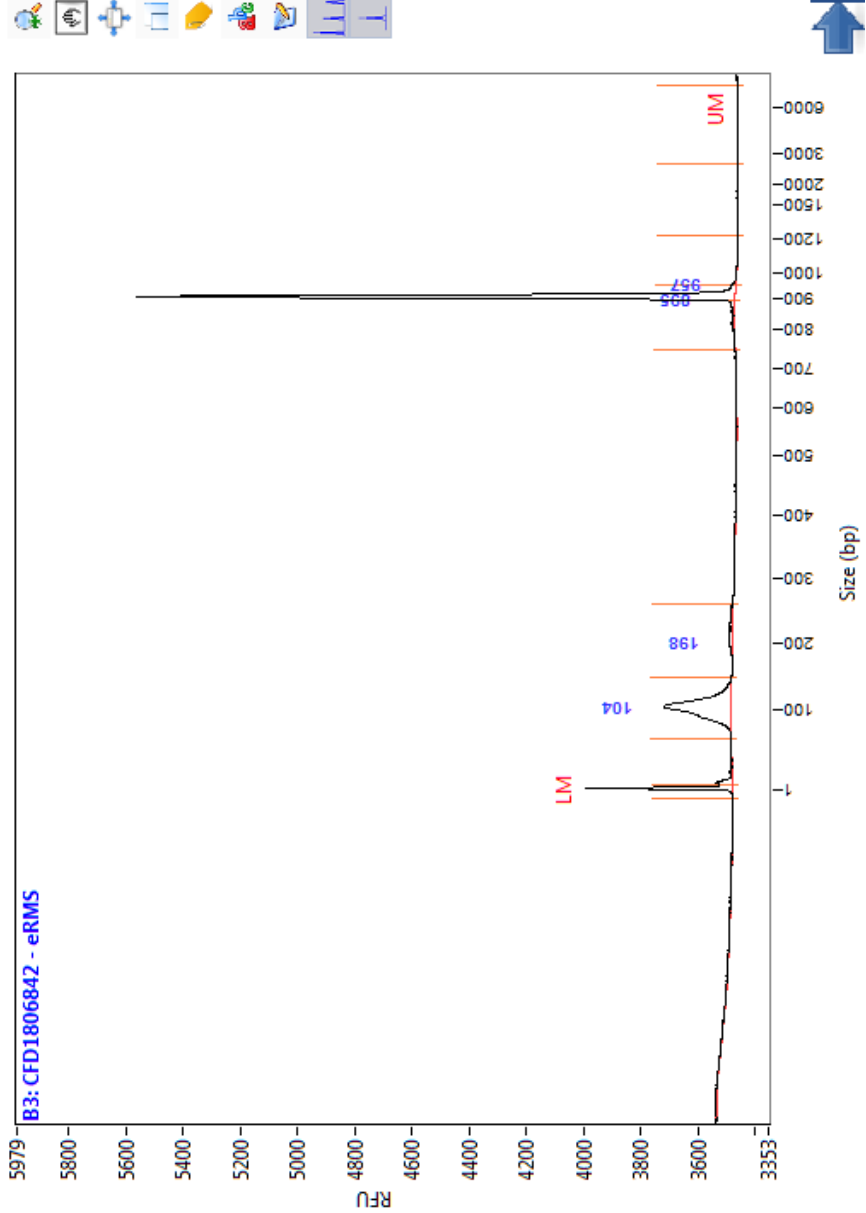

**Peak Table**

| Size (bp)                 | ng/uL  | % (Conc.) (ng/uL) | nmole/L | From (bp) | To (bp) | Avg. Size | CV%    |
|---------------------------|--------|-------------------|---------|-----------|---------|-----------|--------|
| 1 (LM)                    | 0.0007 |                   | 0.9609  | 0         | 7       | 1         | 170.81 |
| 2                         | 0.0217 | 90.5              | 0.3486  | 64        | 148     | 102       | 11.70  |
| 3                         | 0.0015 | 6.2               | 0.0116  | 150       | 259     | 212       | 9.01   |
| 4                         | 0.0006 | 2.5               | 0.0012  | 749       | 897     | 863       | 4.59   |
| 5                         | 0.0002 | 0.8               | 0.0003  | 957       | 1234    | 1033      | 7.39   |
| 6                         | 0.0000 |                   | 0.0000  | 2718      | 7478    | 5023      | 29.78  |
| TIC: 0.0239 ng/uL         |        |                   |         |           |         |           |        |
| TIM: 0.3616 nmole/L       |        |                   |         |           |         |           |        |
| Total Conc.: 0.0470 ng/uL |        |                   |         |           |         |           |        |



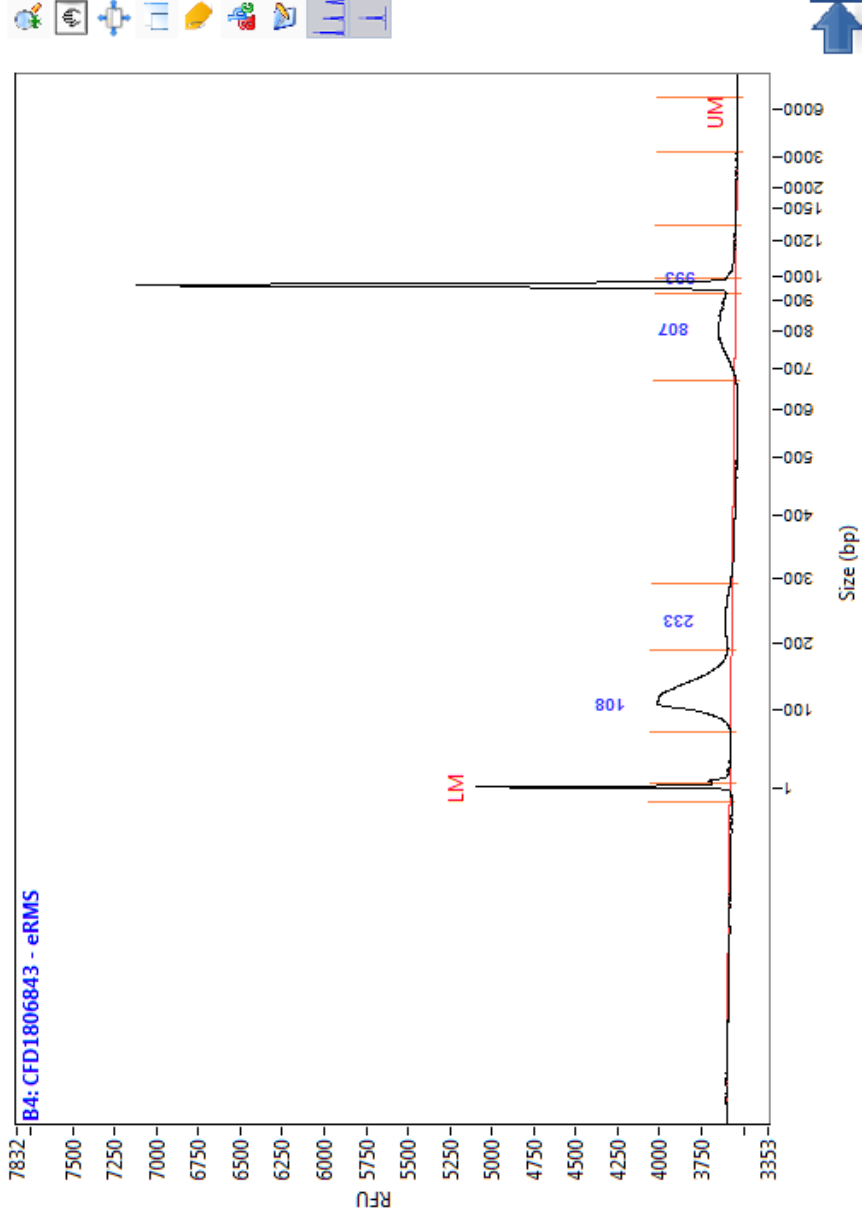

**Peak Table**

| Size (bp)    | ng/uL       | % (Conc.) (ng/uL) | nmole/L | From (bp) | To (bp) | Avg. Size | CV%    |
|--------------|-------------|-------------------|---------|-----------|---------|-----------|--------|
| 1 (LM)       | 0.0007      |                   | 0.9609  | 0         | 7       | 1         | 179.32 |
| 2            | 0.0251      | 75.0              | 0.3375  | 72        | 189     | 122       | 17.12  |
| 3            | 0.0028      | 8.3               | 0.0194  | 189       | 292     | 235       | 10.90  |
| 4            | 0.0050      | 14.9              | 0.0100  | 672       | 931     | 815       | 7.01   |
| 5            | 0.0006      | 1.9               | 0.0009  | 993       | 1350    | 1084      | 8.50   |
| 6            | 0.0000 (UM) |                   | 0.0000  | 3367      | 6933    | 5112      | 20.40  |
| TIC:         |             | 0.0334            | ng/uL   |           |         |           |        |
| TIM:         |             | 0.3678            | nmole/L |           |         |           |        |
| Total Conc.: |             | 0.0478            | ng/uL   |           |         |           |        |

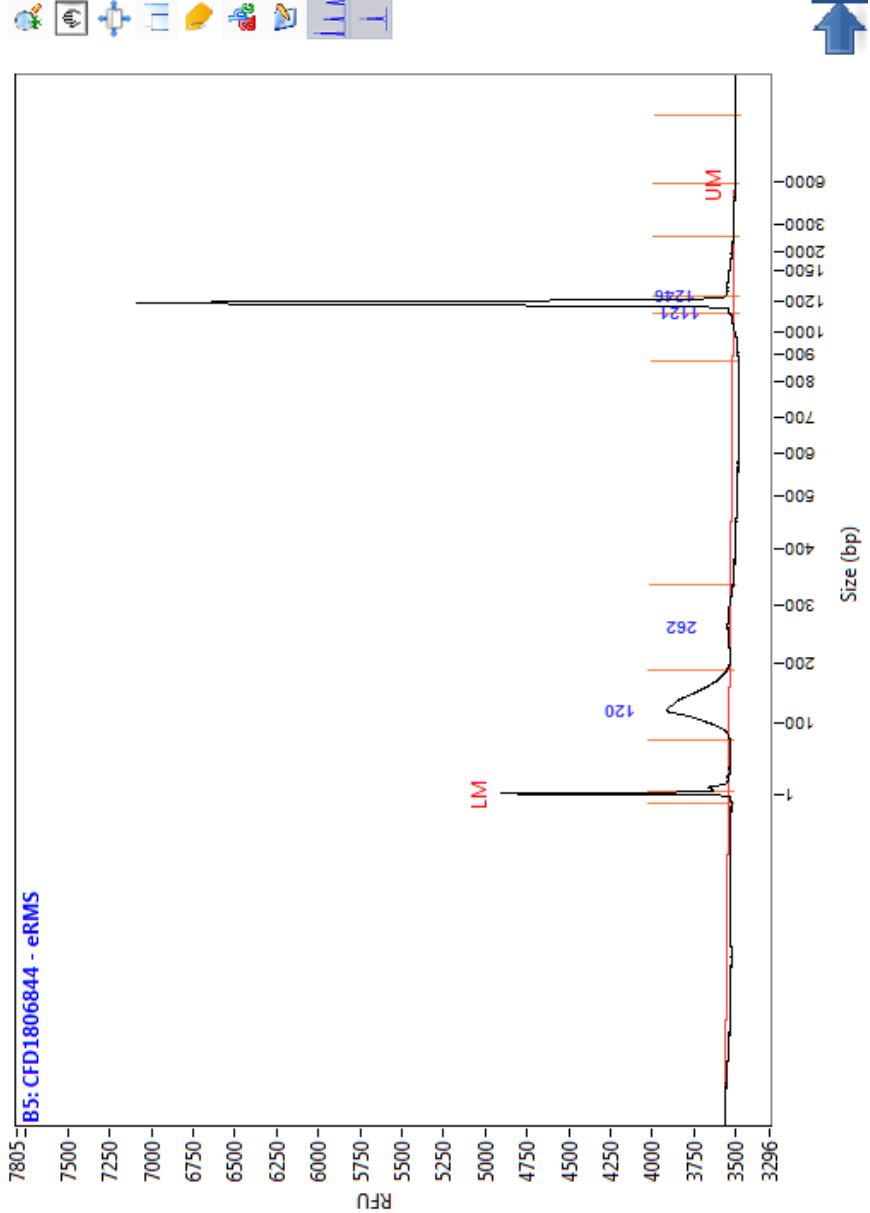

**Peak Table**

| Size (bp)    | ng/uL  | % (Conc.) (ng/uL) | nmole/L | From (bp) | To (bp) | Avg. Size | CV%    |
|--------------|--------|-------------------|---------|-----------|---------|-----------|--------|
| 1 (LM)       | 0.0007 |                   | 0.9609  | 0         | 6       | 1         | 131.77 |
| 2            | 0.0229 | 91.5              | 0.2891  | 78        | 189     | 130       | 15.61  |
| 3            | 0.0007 | 2.9               | 0.0046  | 189       | 337     | 261       | 8.17   |
| 4            | 0.0001 | 0.4               | 0.0001  | 877       | 1123    | 1100      | 1.58   |
| 5            | 0.0013 | 5.3               | 0.0014  | 1246      | 2600    | 1533      | 18.83  |
| 6            |        |                   |         | 6000 (UM) | 10890   | NaN       | NaN    |
| TIC:         |        | 0.0250            | ng/uL   |           |         |           |        |
| TIM:         |        | 0.2952            | nmole/L |           |         |           |        |
| Total Conc.: |        | 0.0423            | ng/uL   |           |         |           |        |

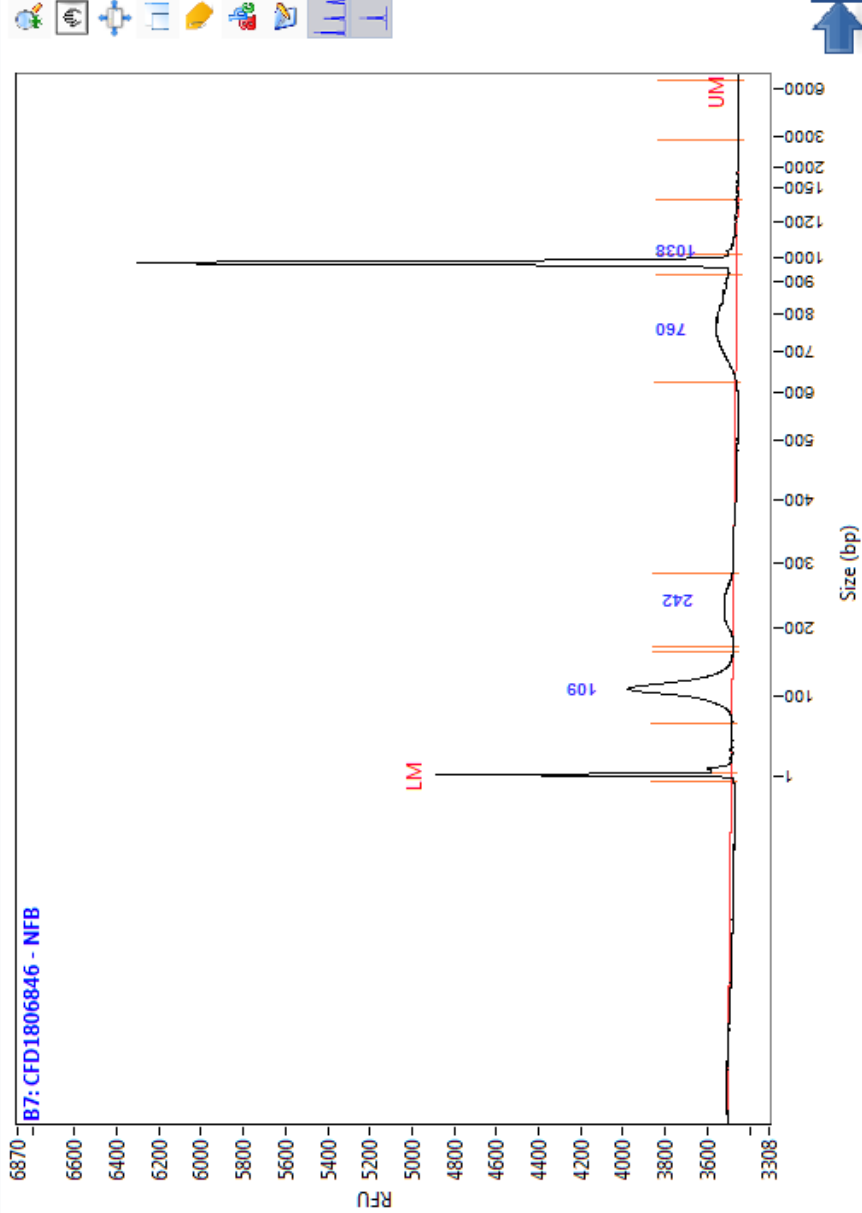

**Peak Table**

| Peak         | Size (bp) | ng/uL  | % (Conc.) (ng/uL) | nmole/L | From (bp) | To (bp) | Avg. Size | CV%    |
|--------------|-----------|--------|-------------------|---------|-----------|---------|-----------|--------|
| 1            | 1 (LM)    | 0.0007 |                   | 0.9609  | 0         | 5       | 1         | 191.18 |
| 2            | 109       | 0.0170 | 61.8              | 0.2558  | 67        | 166     | 109       | 11.00  |
| 3            | 242       | 0.0029 | 10.6              | 0.0206  | 172       | 283     | 233       | 9.26   |
| 4            | 760       | 0.0069 | 24.9              | 0.0144  | 625       | 933     | 781       | 8.68   |
| 5            | 1038      | 0.0007 | 2.6               | 0.0011  | 1019      | 1409    | 1115      | 8.34   |
| 6            | 6000 (UM) | 0.0000 |                   | 0.0000  | 2929      | 6660    | 5391      | 21.47  |
| TIC:         |           | 0.0275 | ng/uL             |         |           |         |           |        |
| TIM:         |           | 0.2919 | nmole/L           |         |           |         |           |        |
| Total Conc.: |           | 0.0421 | ng/uL             |         |           |         |           |        |

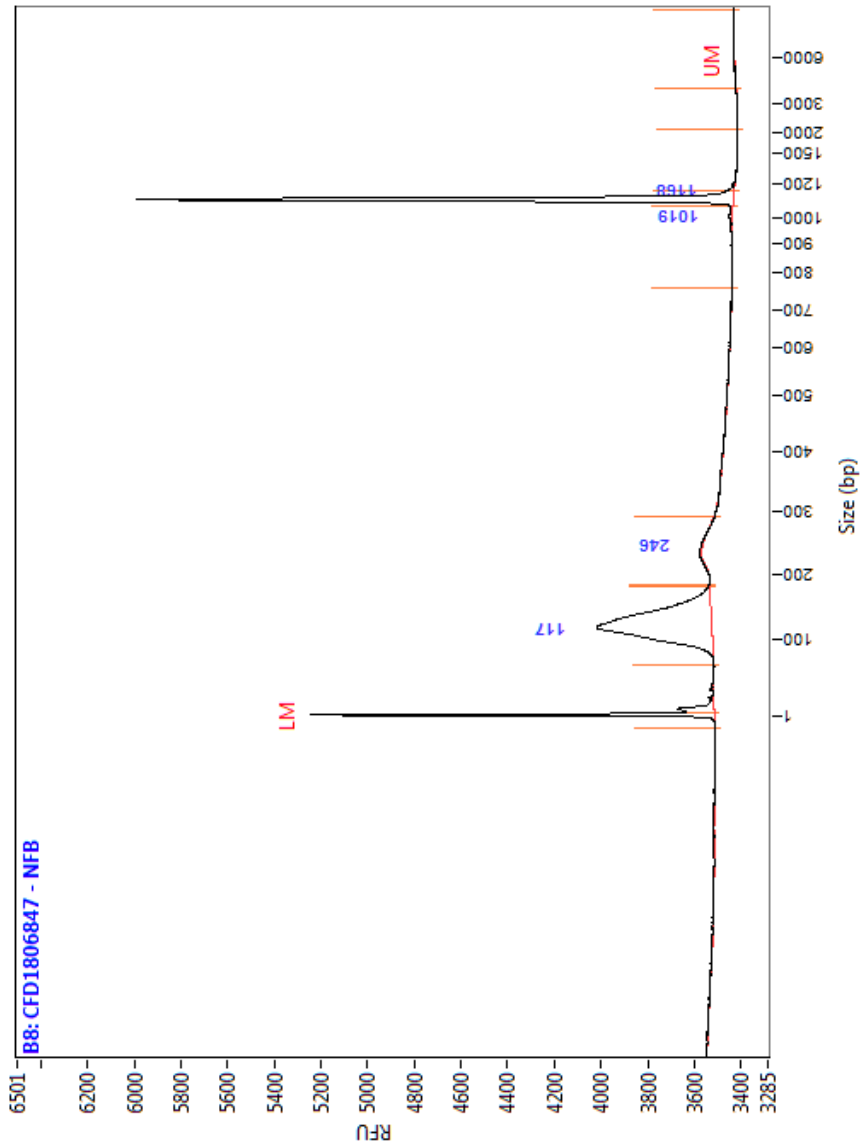

**Peak Table**

| Peak         | Size (bp) | ng/uL  | % (Conc.) (ng/uL) | nmole/L | From (bp) | To (bp) | Avg. Size | CV%    |
|--------------|-----------|--------|-------------------|---------|-----------|---------|-----------|--------|
| 1            | 1 (LM)    | 0.0007 |                   | 0.9609  | 0         | 7       | 1         | 144.87 |
| 2            | 117       | 0.0217 | 98.2              | 0.2928  | 68        | 183     | 122       | 15.28  |
| 3            | 246       | 0.0001 | 0.6               | 0.0010  | 186       | 294     | 233       | 5.76   |
| 4            | 1019      | 0.0002 | 0.9               | 0.0003  | 760       | 1076    | 978       | 8.43   |
| 5            | 1168      | 0.0001 | 0.3               | 0.0001  | 1168      | 2154    | 1237      | 11.68  |
| 6            | 6000 (UM) | 0.0000 |                   | 0.0000  | 4031      | 9298    | 6978      | 17.17  |
| TIC:         |           | 0.0222 | ng/uL             |         |           |         |           |        |
| TIM:         |           | 0.2942 | nmole/L           |         |           |         |           |        |
| Total Conc.: |           | 0.0316 | ng/uL             |         |           |         |           |        |

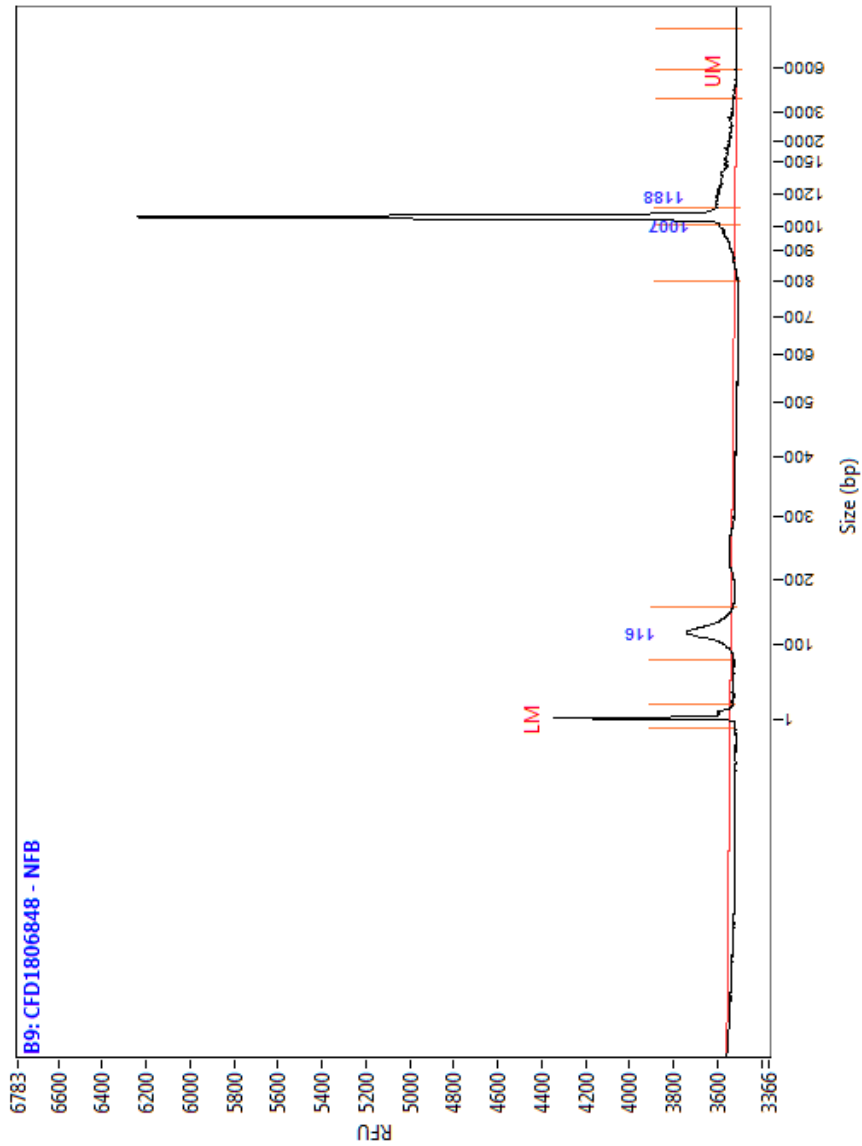

**Peak Table**

| Size (bp)                 | ng/uL       | % (Conc.) (ng/uL) | nmole/L | From (bp) | To (bp) | Avg. Size | CV%    |
|---------------------------|-------------|-------------------|---------|-----------|---------|-----------|--------|
| 1 (LM)                    | 0.0007      |                   | 0.5357  | 0         | 20      | 2         | 151.67 |
| 2                         | 0.0095      | 52.8              | 0.1340  | 79        | 157     | 117       | 8.83   |
| 3                         | 0.0017      | 9.5               | 0.0029  | 800       | 1017    | 966       | 3.78   |
| 4                         | 0.0068      | 37.7              | 0.0070  | 1121      | 4008    | 1599      | 37.07  |
| 5                         | 0.0000 (UM) |                   | 0.0000  | 5977      | 8752    | 6836      | 15.05  |
| TIC: 0.0181 ng/uL         |             |                   |         |           |         |           |        |
| TIM: 0.1439 nmole/L       |             |                   |         |           |         |           |        |
| Total Conc.: 0.0375 ng/uL |             |                   |         |           |         |           |        |

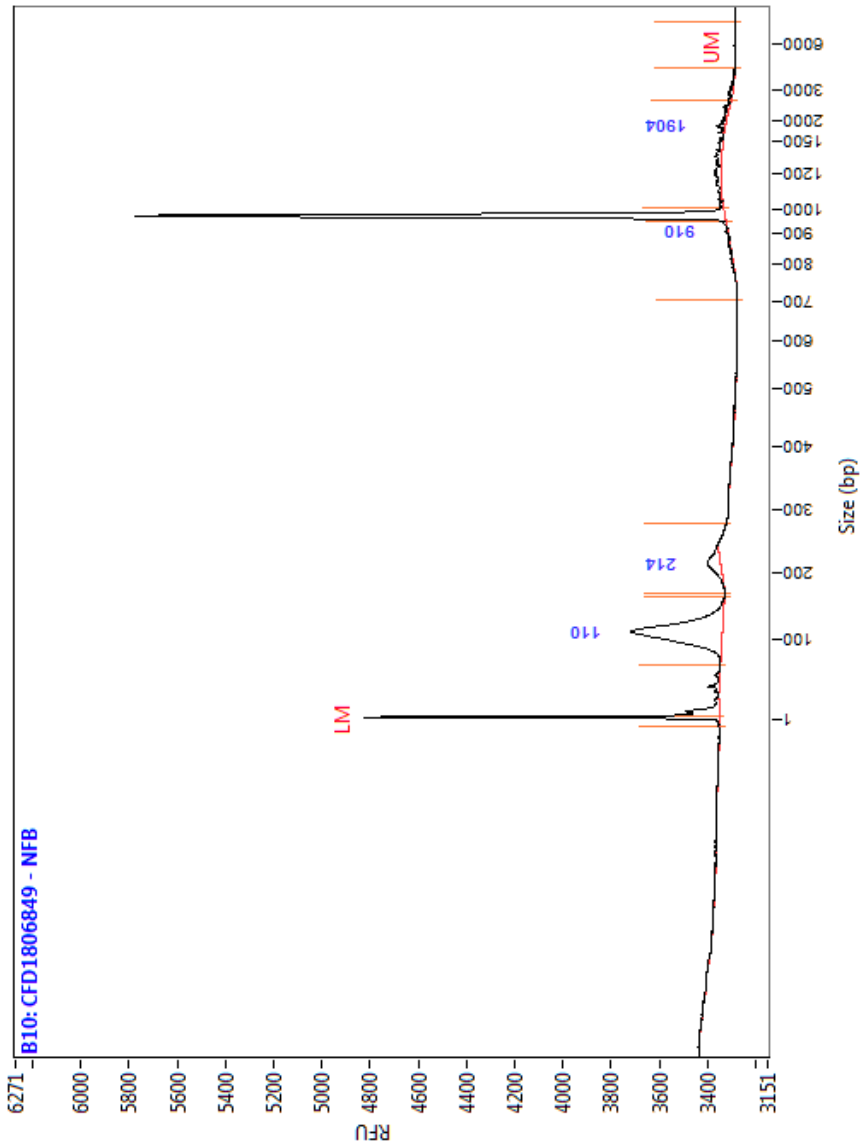

**Peak Table**

| Size (bp)    | ng/uL  | % (Conc.) (ng/uL) | nmole/L | From (bp) | To (bp) | Avg. Size | CV%    |
|--------------|--------|-------------------|---------|-----------|---------|-----------|--------|
| 1 (LM)       | 0.0007 |                   | 0.9609  | 0         | 5       | 1         | 167.43 |
| 2 110        | 0.0145 | 82.5              | 0.2168  | 68        | 166     | 110       | 12.16  |
| 3 214        | 0.0017 | 9.4               | 0.0128  | 169       | 277     | 213       | 5.73   |
| 4 910        | 0.0002 | 1.0               | 0.0003  | 707       | 953     | 870       | 7.11   |
| 5 1904       | 0.0012 | 7.1               | 0.0014  | 1011      | 2718    | 1512      | 28.89  |
| 6 6000 (UM)  | 0.0000 |                   | 0.0000  | 4558      | 7569    | 5715      | 13.33  |
| TIC:         | 0.0176 | ng/uL             |         |           |         |           |        |
| TIM:         | 0.2313 | nmole/L           |         |           |         |           |        |
| Total Conc.: | 0.0299 | ng/uL             |         |           |         |           |        |

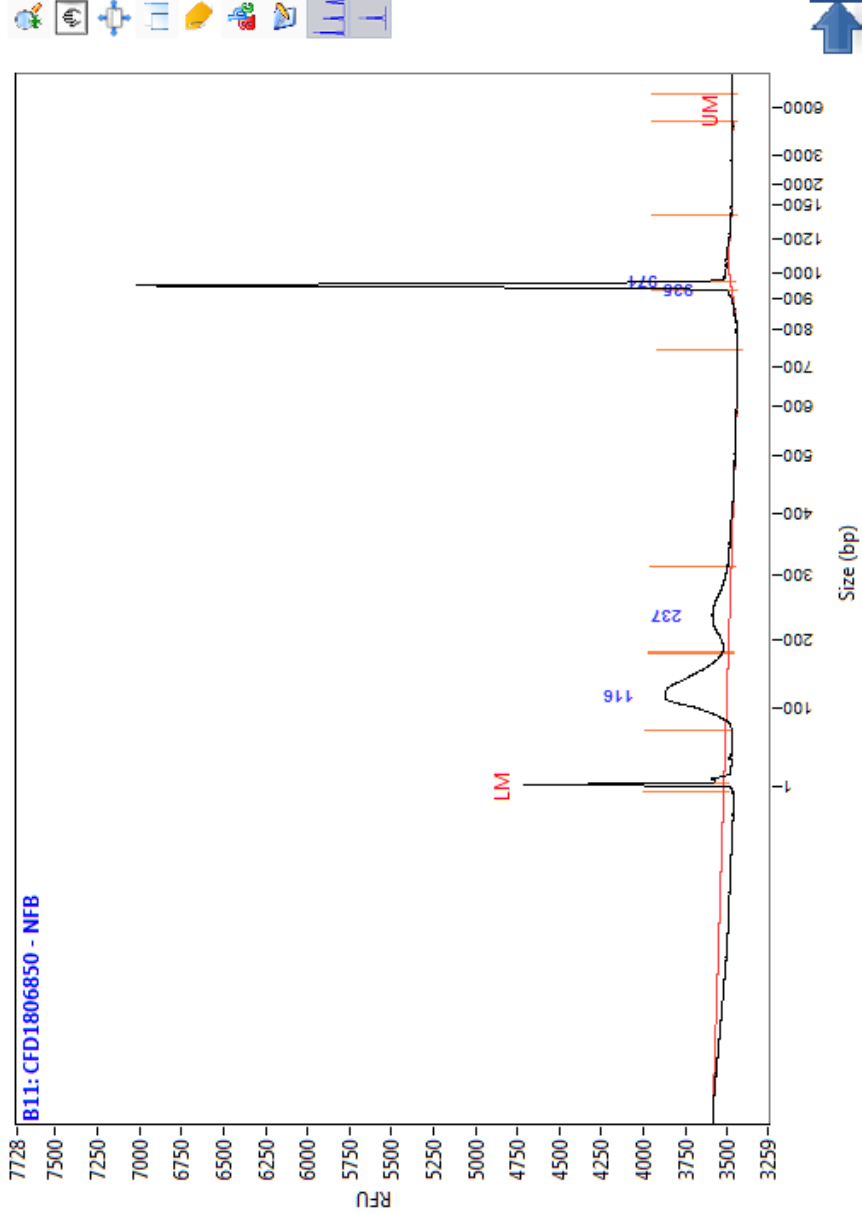

**Peak Table**

| Size (bp)                 | ng/uL  | % (Conc.) (ng/uL) | nmole/L | From (bp) | To (bp) | Avg. Size | CV%    |
|---------------------------|--------|-------------------|---------|-----------|---------|-----------|--------|
| 1 (LM)                    | 0.0007 |                   | 0.9609  | 0         | 6       | 1         | 114.75 |
| 2 116                     | 0.0324 | 72.8              | 0.4254  | 72        | 181     | 125       | 16.54  |
| 3 237                     | 0.0108 | 24.2              | 0.0729  | 184       | 316     | 243       | 12.46  |
| 4 935                     | 0.0004 | 0.8               | 0.0007  | 747       | 937     | 892       | 5.89   |
| 5 971                     | 0.0010 | 2.2               | 0.0016  | 971       | 1425    | 1034      | 8.16   |
| 6 6000 (UM)               | 0.0000 |                   | 0.0000  | 5222      | 7001    | 6067      | 9.23   |
| TIC: 0.0445 ng/uL         |        |                   |         |           |         |           |        |
| TIM: 0.5006 nmole/L       |        |                   |         |           |         |           |        |
| Total Conc.: 0.0644 ng/uL |        |                   |         |           |         |           |        |

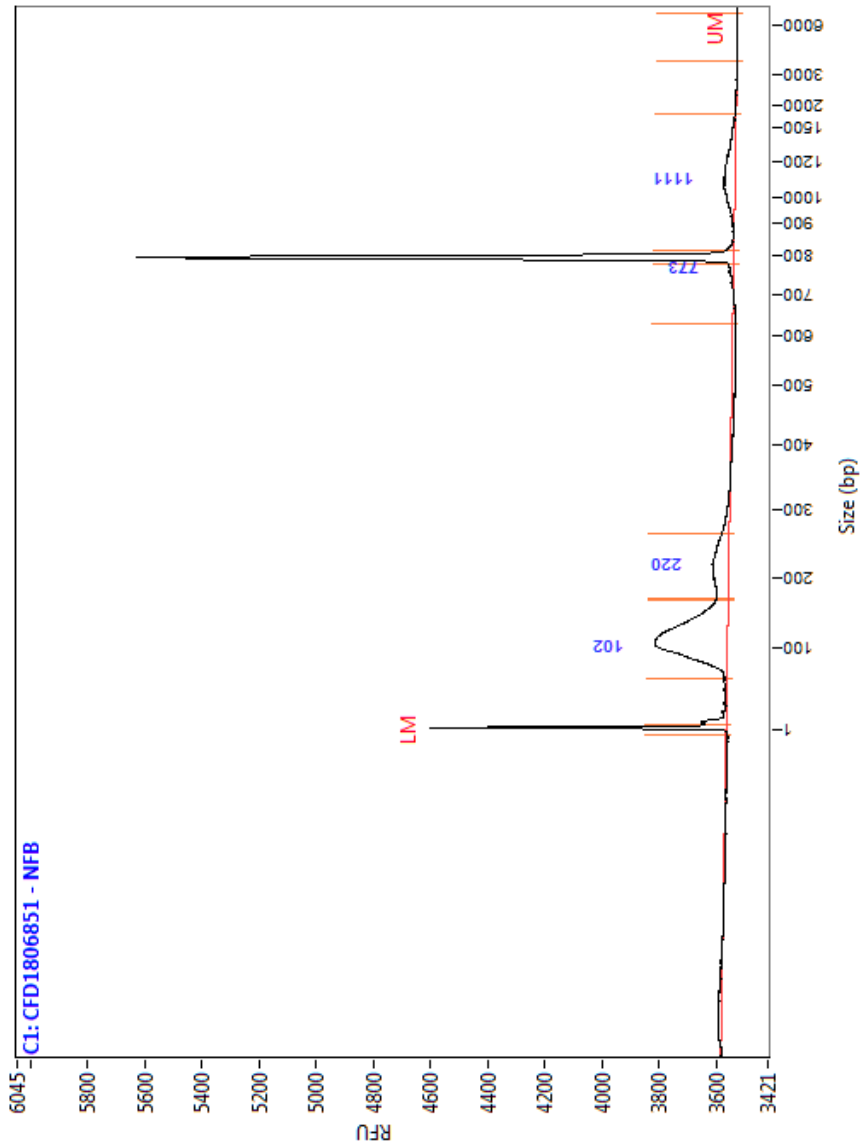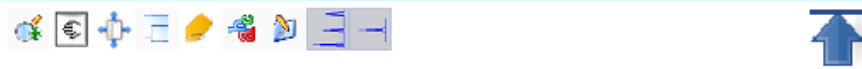

Peak Table

| Size (bp)    | ng/uL  | % (Conc.) (ng/uL) | nmole/L | From (bp) | To (bp) | Avg. Size | CV%    |
|--------------|--------|-------------------|---------|-----------|---------|-----------|--------|
| 1 (LM)       | 0.0007 |                   | 0.9487  | 0         | 6       | 1         | 149.08 |
| 2 102        | 0.0264 | 73.3              | 0.3866  | 62        | 168     | 112       | 19.74  |
| 3 220        | 0.0062 | 17.2              | 0.0474  | 171       | 265     | 215       | 11.67  |
| 4 773        | 0.0003 | 0.8               | 0.0007  | 629       | 778     | 755       | 2.19   |
| 5 1111       | 0.0031 | 8.6               | 0.0045  | 816       | 1825    | 1129      | 15.78  |
| 6 6000 (UM)  | 0.0000 |                   | 0.0000  | 3871      | 6864    | 5711      | 14.37  |
| TIC:         |        | 0.0360            | ng/uL   |           |         |           |        |
| TIM:         |        | 0.4392            | nmole/L |           |         |           |        |
| Total Conc.: |        | 0.0509            | ng/uL   |           |         |           |        |



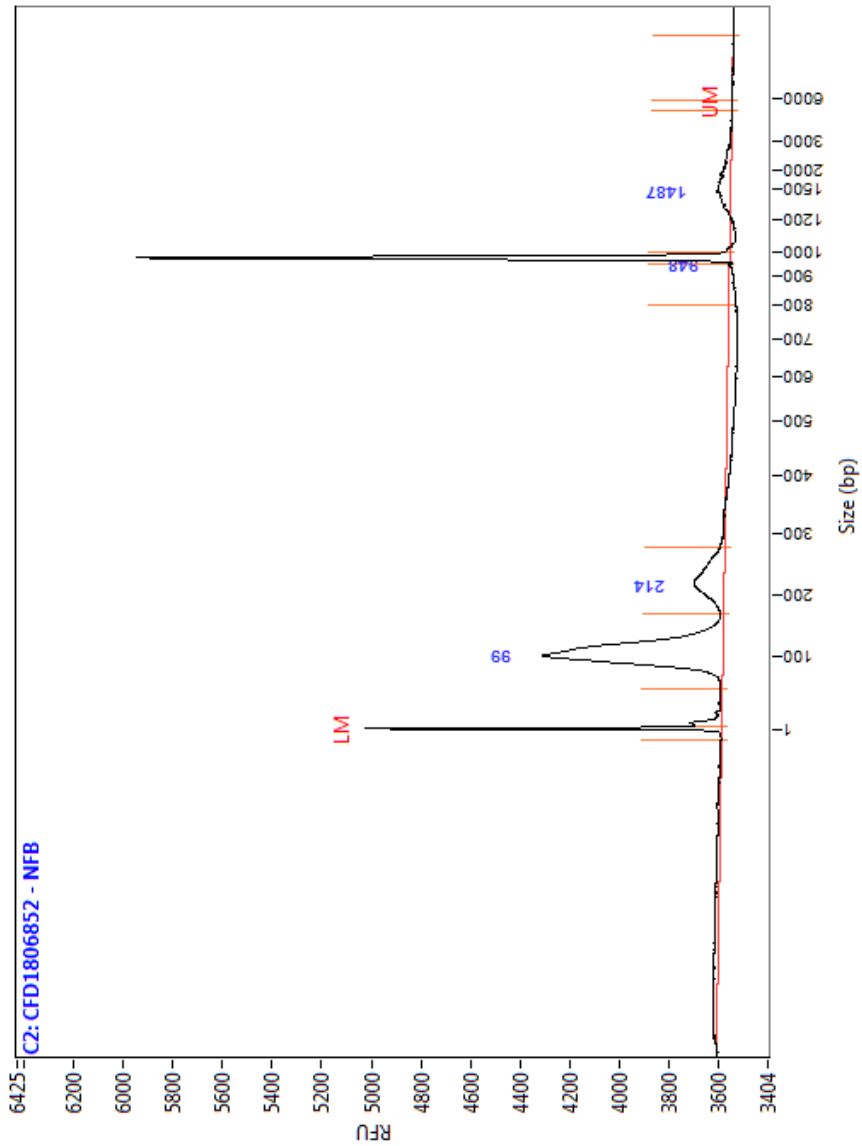

**Peak Table**

| Size (bp)                 | ng/uL  | % (Conc.) (ng/uL) | nmole/L | From (bp) | To (bp) | Avg. Size | CV%    |
|---------------------------|--------|-------------------|---------|-----------|---------|-----------|--------|
| 1 (LM)                    | 0.0007 |                   | 0.9487  | 0         | 6       | 1         | 176.80 |
| 99                        | 0.0324 | 78.2              | 0.5068  | 56        | 167     | 105       | 15.19  |
| 214                       | 0.0071 | 17.2              | 0.0527  | 169       | 279     | 222       | 10.84  |
| 948                       | 0.0000 | 0.0               | 0.0000  | 799       | 953     | 947       | 0.09   |
| 1487                      | 0.0019 | 4.6               | 0.0018  | 1007      | 5245    | 1806      | 28.62  |
| 6000 (UM)                 | 0.0000 |                   | 0.0000  | 5954      | 10458   | 7204      | 22.19  |
| TIC: 0.0414 ng/uL         |        |                   |         |           |         |           |        |
| TIM: 0.5612 nmole/L       |        |                   |         |           |         |           |        |
| Total Conc.: 0.0526 ng/uL |        |                   |         |           |         |           |        |

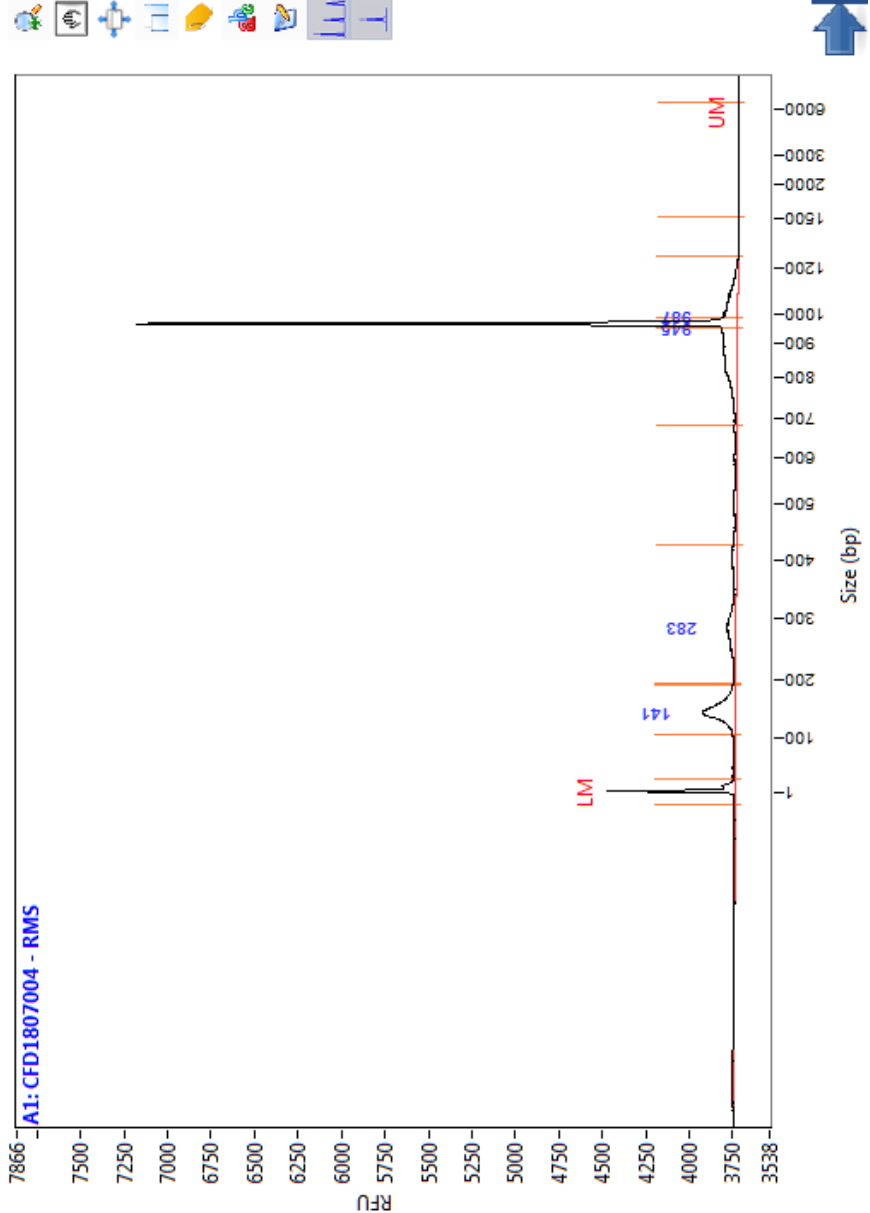

**Peak Table**

| Size (bp)                 | ng/uL       | % (Conc.) (ng/uL) | nmole/L | From (bp) | To (bp) | Avg. Size | CV%    |
|---------------------------|-------------|-------------------|---------|-----------|---------|-----------|--------|
| 1 (LM)                    | 0.0013      |                   | 0.9492  | 0         | 25      | 2         | 233.80 |
| 2                         | 0.0205      | 37.6              | 0.2339  | 107       | 191     | 144       | 11.17  |
| 3                         | 0.0135      | 24.8              | 0.0732  | 194       | 427     | 304       | 19.54  |
| 4                         | 0.0146      | 26.9              | 0.0285  | 683       | 953     | 846       | 8.01   |
| 5                         | 0.0058      | 10.7              | 0.0090  | 987       | 1272    | 1061      | 5.48   |
| 6                         | 0.0000 (UM) |                   | 0.0000  | 1522      | 6542    | 5844      | 6.49   |
| TIC: 0.0545 ng/uL         |             |                   |         |           |         |           |        |
| TIM: 0.3447 nmole/L       |             |                   |         |           |         |           |        |
| Total Conc.: 0.0883 ng/uL |             |                   |         |           |         |           |        |

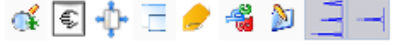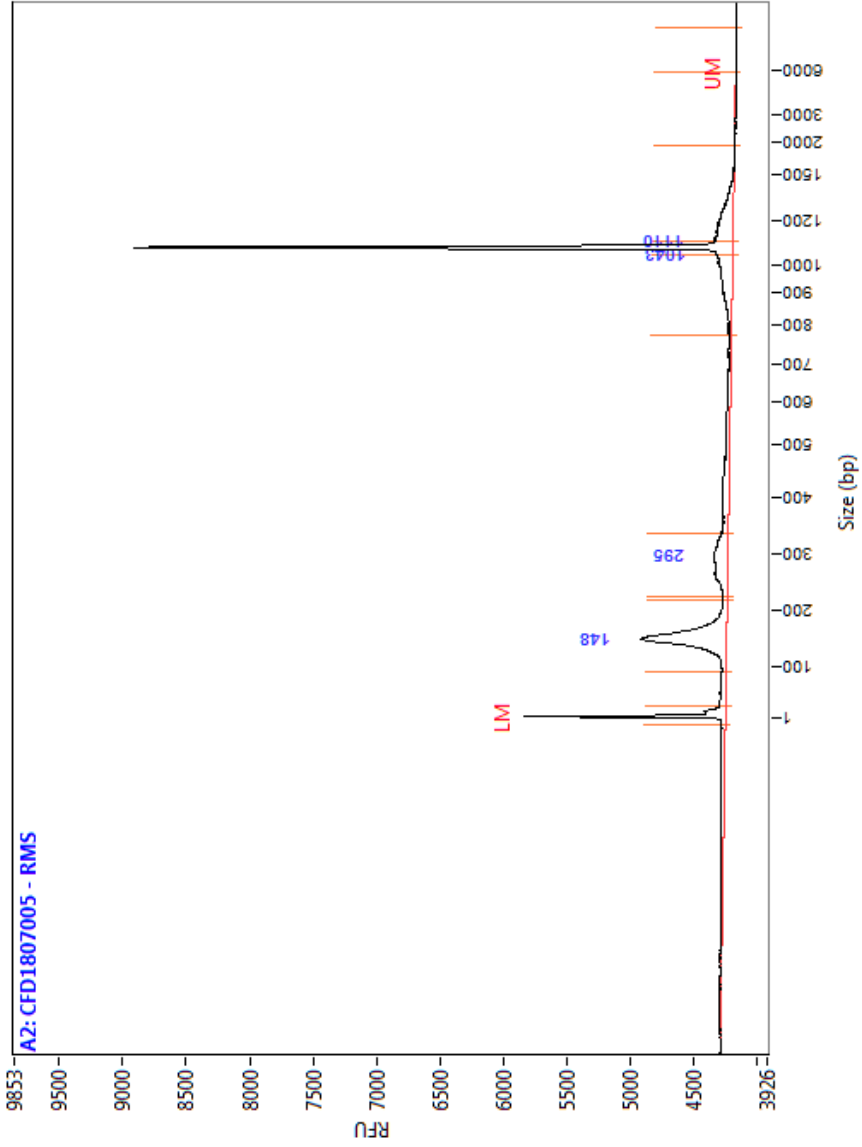

**Peak Table**

| Size (bp)    | ng/uL  | % (Conc.) (ng/uL) | nmole/L | From (bp) | To (bp) | Avg. Size | CV%    |
|--------------|--------|-------------------|---------|-----------|---------|-----------|--------|
| 1 (LM)       | 0.0013 |                   | 0.6580  | 0         | 25      | 3         | 222.60 |
| 2            | 0.0307 | 57.4              | 0.3385  | 89        | 217     | 149       | 13.78  |
| 3            | 0.0102 | 19.2              | 0.0598  | 226       | 335     | 282       | 9.80   |
| 4            | 0.0065 | 12.2              | 0.0115  | 775       | 1045    | 935       | 7.60   |
| 5            | 0.0060 | 11.2              | 0.0081  | 1110      | 1966    | 1223      | 7.45   |
| 6            |        |                   |         | 6000 (UM) | 9100    | NaN       | NaN    |
| TIC:         |        | 0.0535            | ng/uL   |           |         |           |        |
| TIM:         |        | 0.4178            | nmole/L |           |         |           |        |
| Total Conc.: |        | 0.0845            | ng/uL   |           |         |           |        |

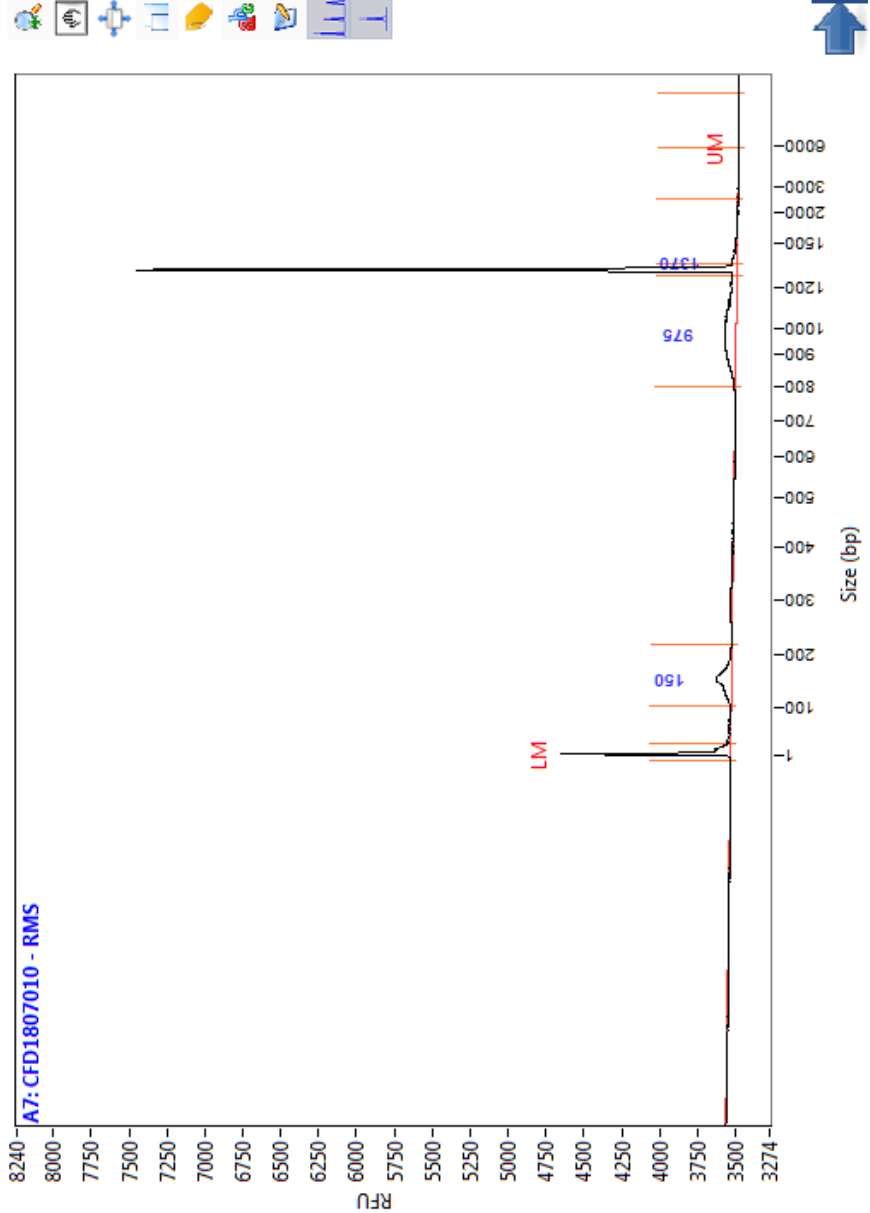

**Peak Table**

| Size (bp)                 | ng/uL  | % (Conc.) (ng/uL) | nmole/L | From (bp) | To (bp) | Avg. Size | CV%    |
|---------------------------|--------|-------------------|---------|-----------|---------|-----------|--------|
| 1 (LM)                    | 0.0013 |                   | 0.6580  | 0         | 25      | 3         | 208.31 |
| 2                         | 0.0090 | 40.9              | 0.0997  | 103       | 217     | 149       | 13.93  |
| 3                         | 0.0121 | 54.8              | 0.0198  | 799       | 1286    | 1008      | 11.48  |
| 4                         | 0.0010 | 4.3               | 0.0011  | 1367      | 2597    | 1462      | 8.65   |
| 5                         |        |                   |         | 6000      | 10033   | 10033     | 0.00   |
| TIC: 0.0221 ng/uL         |        |                   |         |           |         |           |        |
| TIM: 0.1206 nmole/L       |        |                   |         |           |         |           |        |
| Total Conc.: 0.0466 ng/uL |        |                   |         |           |         |           |        |

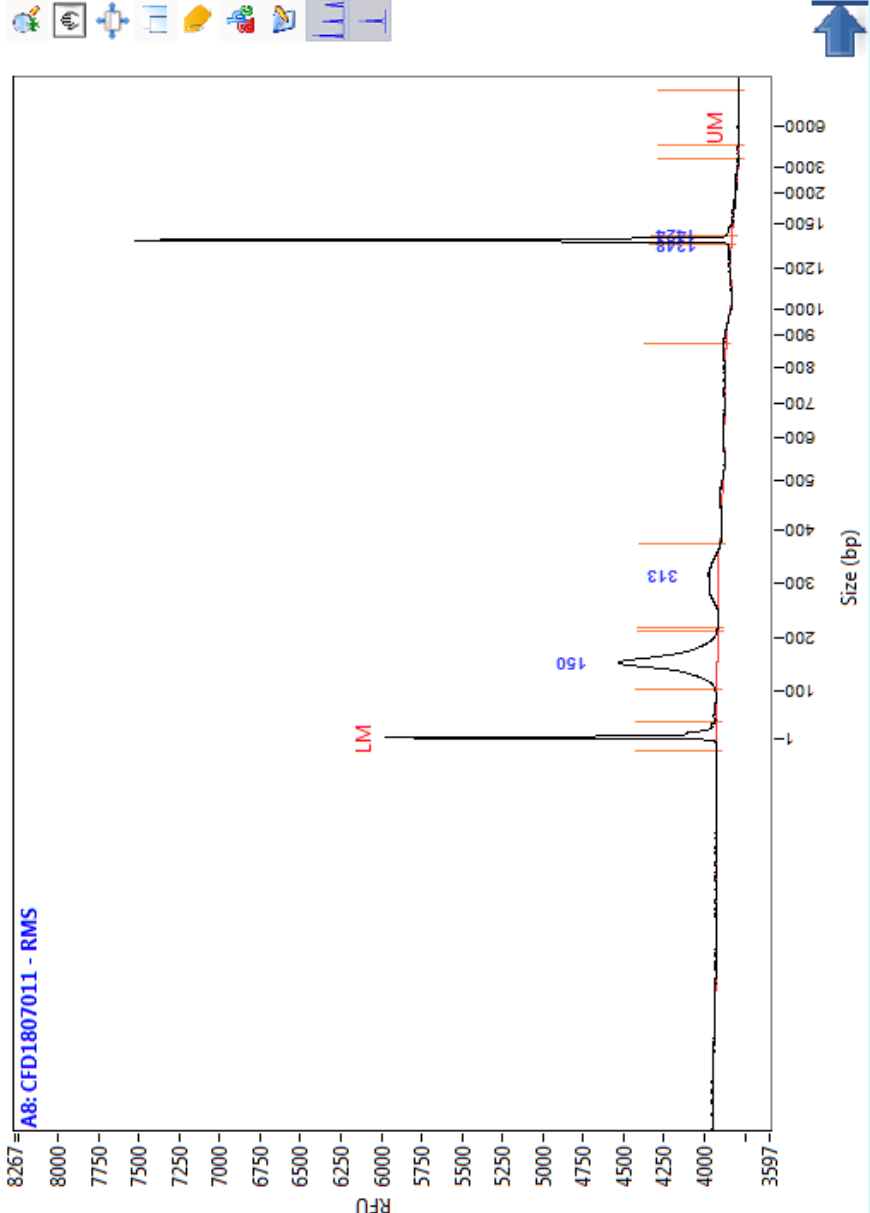

**Peak Table**

| Size (bp)                 | ng/uL  | % (Conc.) (ng/uL) | nmole/L | From (bp) | To (bp) | Avg. Size | CV%    |
|---------------------------|--------|-------------------|---------|-----------|---------|-----------|--------|
| 1 (LM)                    | 0.0013 |                   | 0.6580  | 0         | 37      | 3         | 222.05 |
| 2                         | 0.0234 | 82.6              | 0.2550  | 103       | 212     | 151       | 11.16  |
| 3                         | 0.0038 | 13.5              | 0.0210  | 219       | 376     | 301       | 8.14   |
| 4                         | 0.0006 | 2.1               | 0.0009  | 875       | 1365    | 1122      | 16.22  |
| 5                         | 0.0005 | 1.8               | 0.0005  | 1424      | 3667    | 1827      | 30.81  |
| 6                         | 0.0000 |                   | 0.0000  | 4697      | 8678    | 6233      | 13.83  |
| TIC: 0.0284 ng/uL         |        |                   |         |           |         |           |        |
| TIM: 0.2774 nmole/L       |        |                   |         |           |         |           |        |
| Total Conc.: 0.0404 ng/uL |        |                   |         |           |         |           |        |

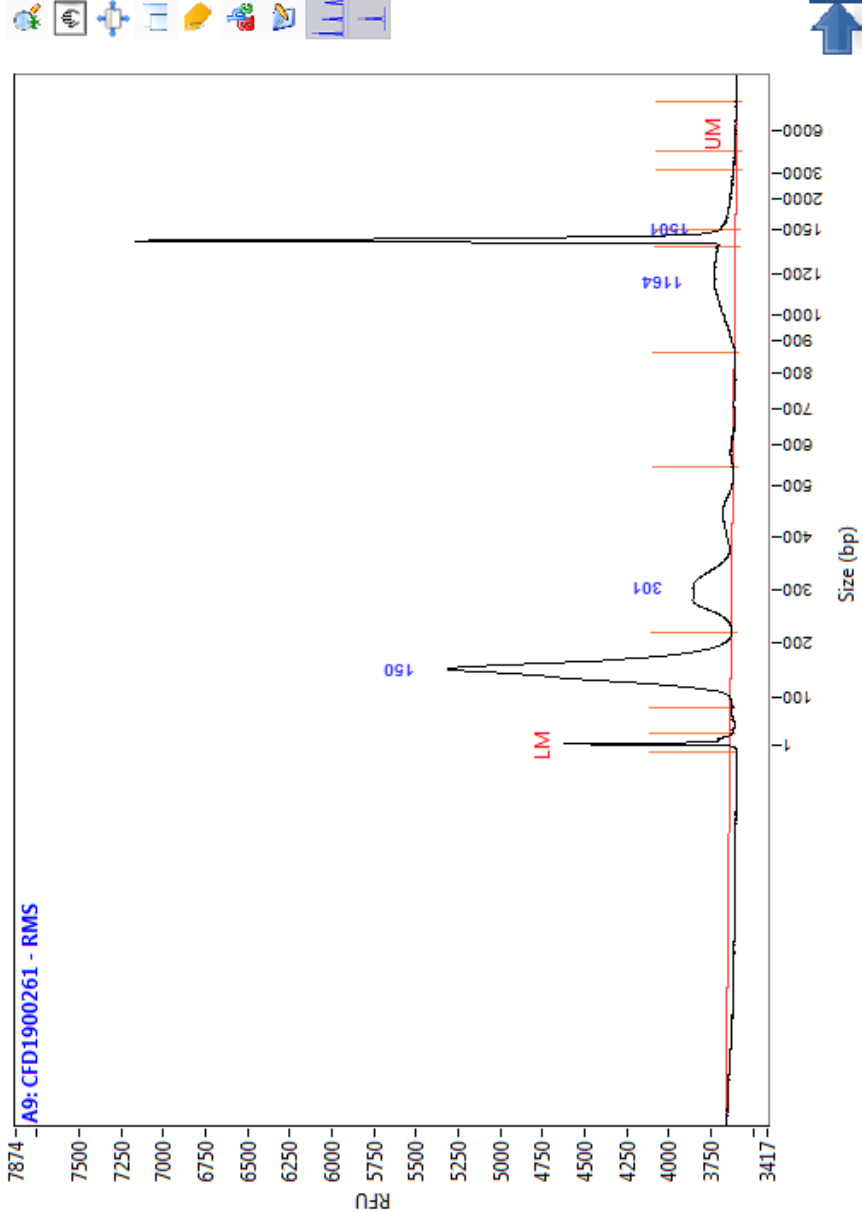

**Peak Table**

| Size (bp)                 | ng/uL  | % (Conc.) (ng/uL) | nmole/L | From (bp) | To (bp) | Avg. Size | CV%    |
|---------------------------|--------|-------------------|---------|-----------|---------|-----------|--------|
| 1 (LM)                    | 0.0013 |                   | 1.7025  | 0         | 26      | 1         | 273.60 |
| 2 150                     | 0.1686 | 68.5              | 1.8853  | 77        | 219     | 147       | 11.52  |
| 3 301                     | 0.0496 | 20.1              | 0.2547  | 219       | 545     | 320       | 18.58  |
| 4 1164                    | 0.0225 | 9.1               | 0.0320  | 866       | 1387    | 1156      | 10.83  |
| 5 1501                    | 0.0056 | 2.3               | 0.0048  | 1501      | 3274    | 1938      | 21.69  |
| 6 6000 (UM)               | 0.0001 |                   | 0.0000  | 4637      | 8287    | 5986      | 16.91  |
| TIC: 0.2463 ng/uL         |        |                   |         |           |         |           |        |
| TIM: 2.1768 nmole/L       |        |                   |         |           |         |           |        |
| Total Conc.: 0.2887 ng/uL |        |                   |         |           |         |           |        |

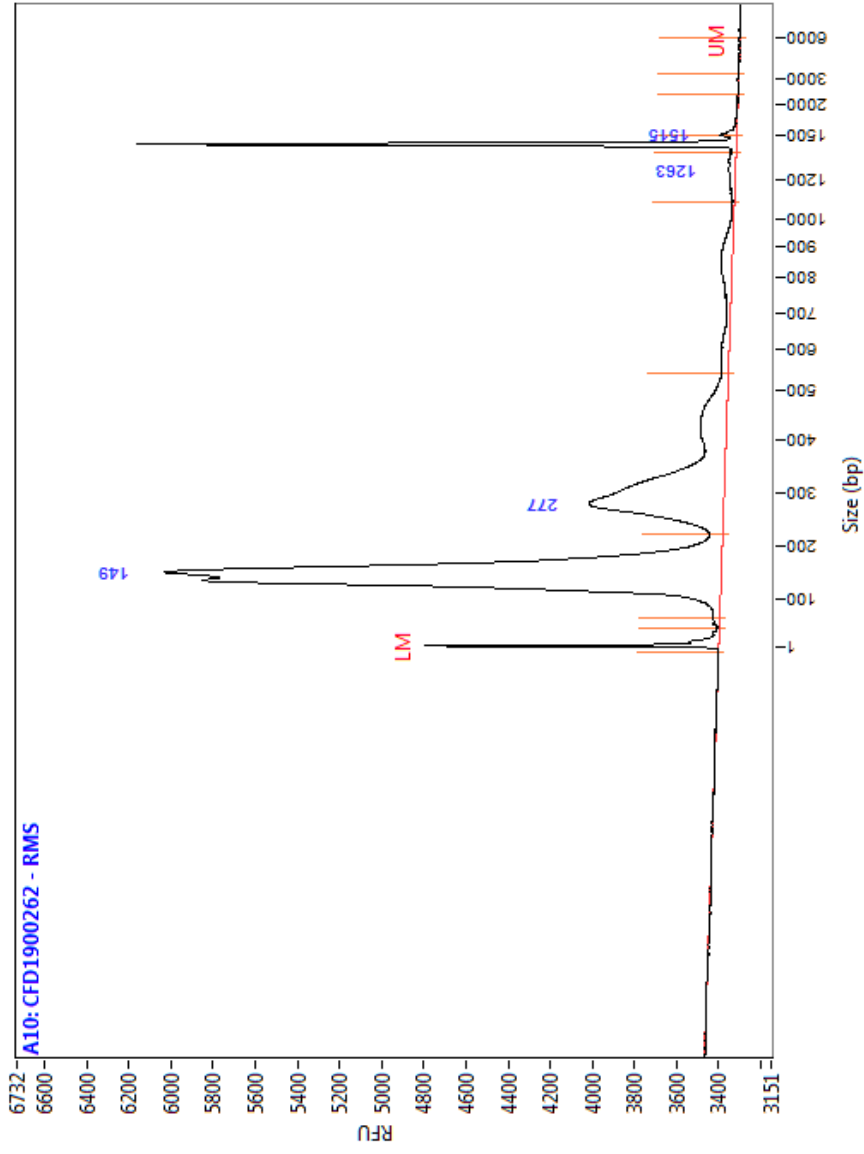

Peak Table

| Size (bp)                 | ng/uL       | % (Conc.) (ng/uL) | nmole/L | From (bp) | To (bp) | Avg. Size | CV%    |
|---------------------------|-------------|-------------------|---------|-----------|---------|-----------|--------|
| 1 (LM)                    | 0.0013      |                   | 0.5036  | 0         | 39      | 4         | 199.31 |
| 2                         | 0.2076      | 70.3              | 2.3691  | 62        | 221     | 144       | 14.80  |
| 3                         | 0.0853      | 28.9              | 0.4370  | 221       | 541     | 321       | 21.22  |
| 4                         | 0.0019      | 0.6               | 0.0025  | 1089      | 1387    | 1245      | 6.50   |
| 5                         | 0.0007      | 0.2               | 0.0007  | 1508      | 2436    | 1613      | 8.71   |
| 6                         | 0.0000 (UM) |                   | 0.0000  | 3455      | 6120    | 5365      | 12.09  |
| TIC: 0.2955 ng/uL         |             |                   |         |           |         |           |        |
| TIM: 2.8093 nmole/L       |             |                   |         |           |         |           |        |
| Total Conc.: 0.3196 ng/uL |             |                   |         |           |         |           |        |

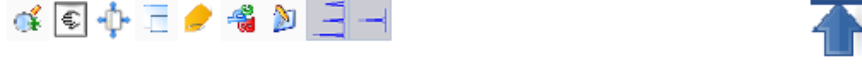

**Peak Table**

| Size (bp)    | ng/uL  | % (Conc.) (ng/uL) | nmole/L | From (bp) | To (bp) | Avg. Size | CV%    |
|--------------|--------|-------------------|---------|-----------|---------|-----------|--------|
| 1 (LM)       | 0.0013 |                   | 0.6580  | 0         | 41      | 3         | 202.51 |
| 2            | 0.1090 | 81.6              | 1.3372  | 72        | 195     | 134       | 10.22  |
| 3            | 0.0151 | 11.3              | 0.1039  | 195       | 276     | 239       | 5.66   |
| 4            | 0.0085 | 6.4               | 0.0162  | 748       | 934     | 867       | 4.52   |
| 5            | 0.0009 | 0.7               | 0.0014  | 987       | 1597    | 1122      | 13.58  |
| 6            | 0.0000 |                   | 0.0000  | 3698      | 7414    | 5590      | 14.89  |
| TIC:         |        | 0.1336            | ng/uL   |           |         |           |        |
| TIM:         |        | 1.4586            | nmole/L |           |         |           |        |
| Total Conc.: |        | 0.1590            | ng/uL   |           |         |           |        |

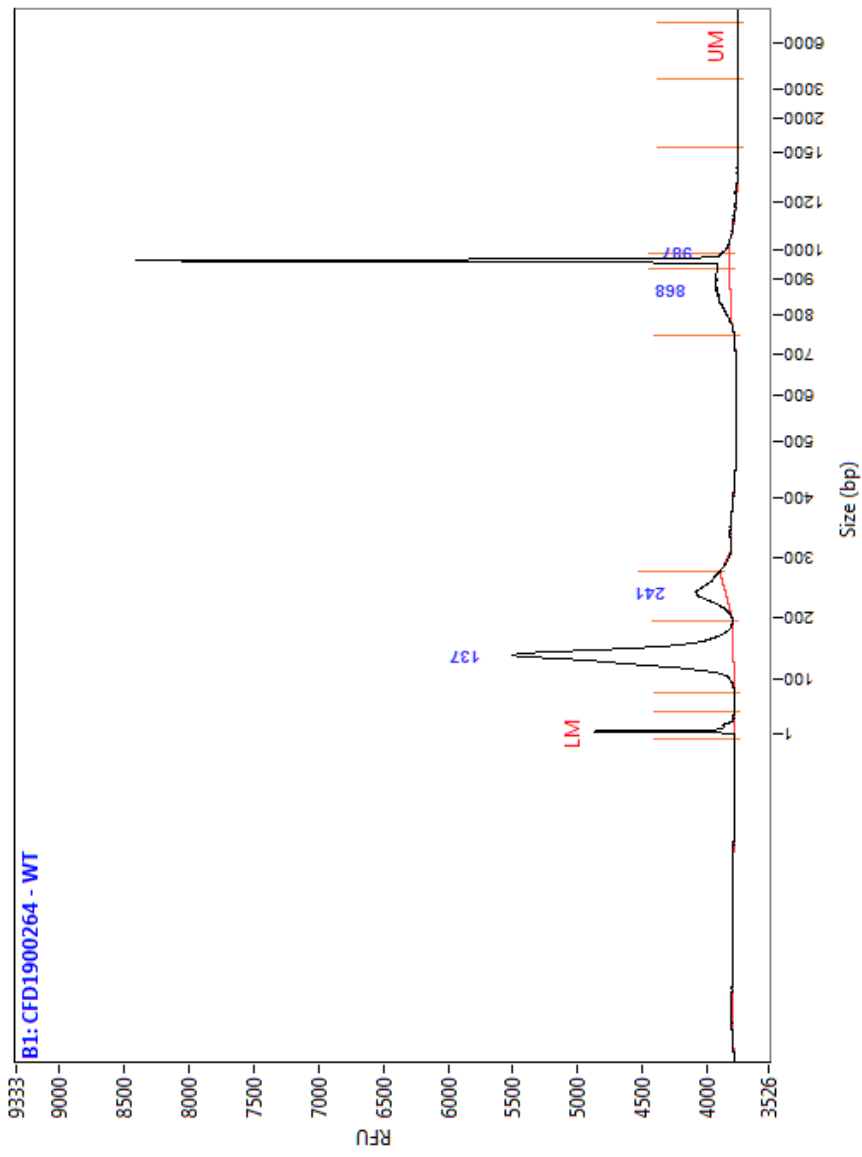



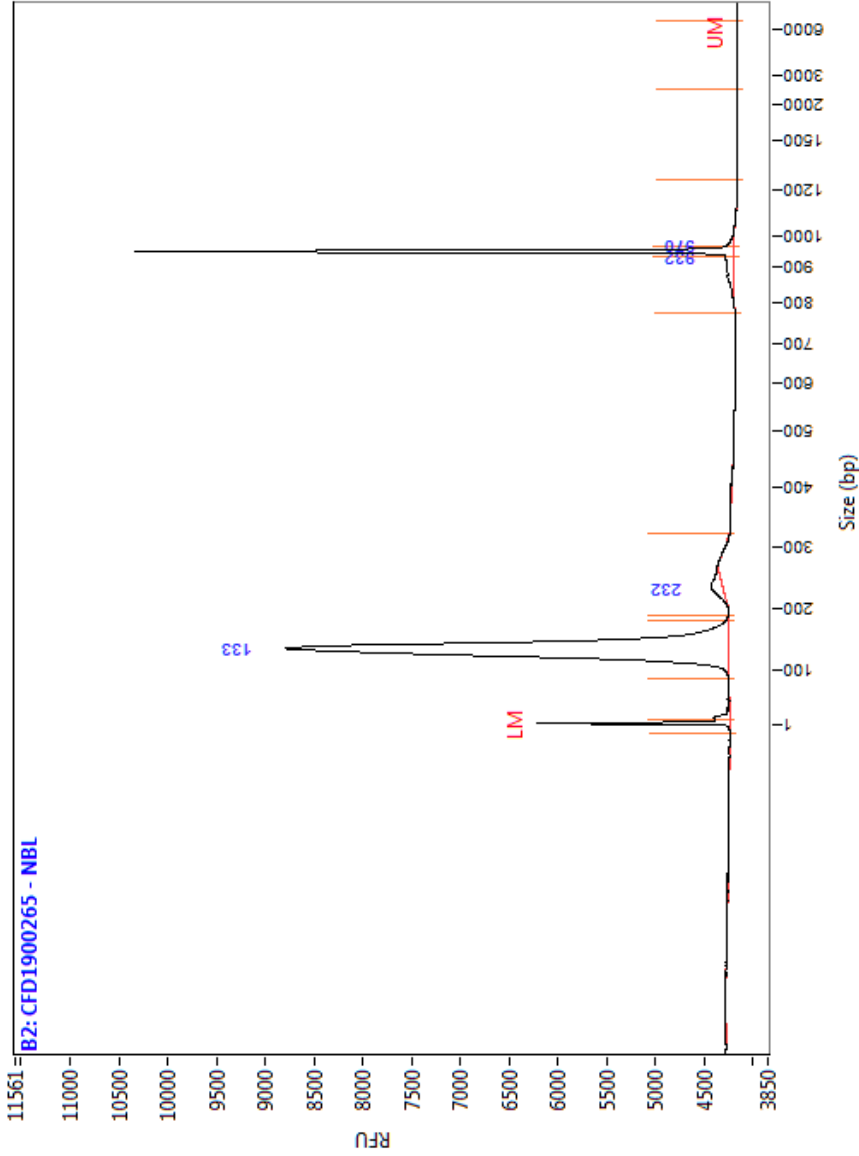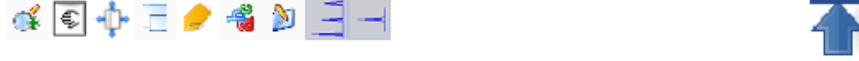

Peak Table

| Size (bp)    | ng/uL  | % (Conc.) (ng/uL) | nmole/L | From (bp) | To (bp) | Avg. Size | CV%    |
|--------------|--------|-------------------|---------|-----------|---------|-----------|--------|
| 1 (LM)       | 0.0013 |                   | 1.7025  | 0         | 9       | 1         | 295.65 |
| 2 133        | 0.1790 | 95.7              | 2.2450  | 85        | 182     | 131       | 8.97   |
| 3 232        | 0.0051 | 2.7               | 0.0356  | 190       | 323     | 235       | 5.91   |
| 4 932        | 0.0025 | 1.3               | 0.0047  | 775       | 936     | 888       | 3.56   |
| 5 970        | 0.0005 | 0.3               | 0.0008  | 970       | 1266    | 1009      | 6.93   |
| 6 6000 (UM)  | 0.0000 |                   | 0.0000  | 2581      | 6632    | 4674      | 31.86  |
| TIC:         | 0.1871 | ng/uL             |         |           |         |           |        |
| TIM:         | 2.2861 | nmole/L           |         |           |         |           |        |
| Total Conc.: | 0.2115 | ng/uL             |         |           |         |           |        |

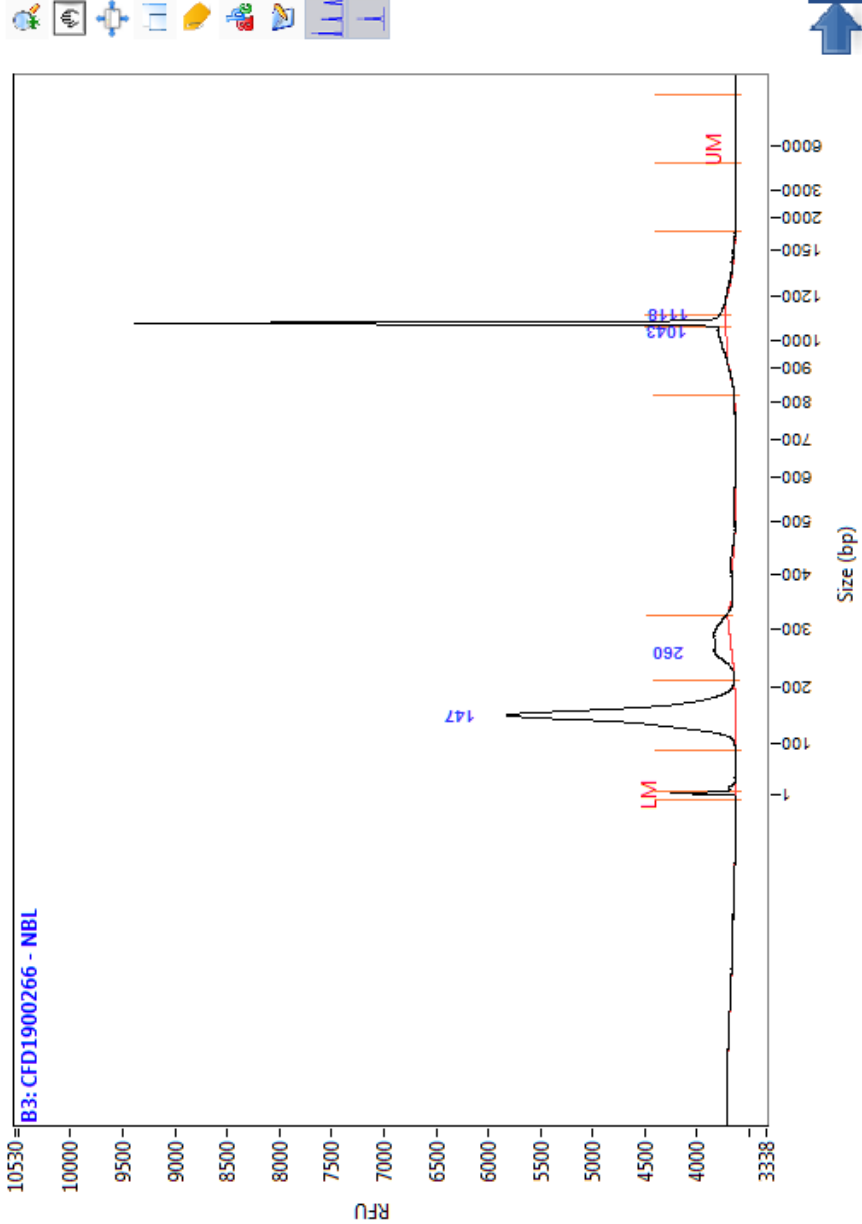

**Peak Table**

| Size (bp)    | ng/uL       | % (Conc.) (ng/uL) | nmole/L | From (bp) | To (bp) | Avg. Size | CV%     |
|--------------|-------------|-------------------|---------|-----------|---------|-----------|---------|
| 1 (LM)       | 0.0013      |                   | 8.2518  | 0         | 6       | 0         | 1448.41 |
| 2            | 0.2950      | 85.4              | 3.3209  | 86        | 212     | 146       | 10.21   |
| 3            | 0.0405      | 11.7              | 0.2433  | 212       | 327     | 274       | 7.94    |
| 4            | 0.0067      | 2.0               | 0.0110  | 819       | 1063    | 1007      | 4.07    |
| 5            | 0.0030      | 0.9               | 0.0039  | 1118      | 1802    | 1285      | 13.09   |
| 6            | 0.0000 (UM) |                   | 0.0000  | 4940      | 9702    | 6610      | 20.74   |
| TIC:         |             | 0.3453            | ng/uL   |           |         |           |         |
| TIM:         |             | 3.5791            | nmole/L |           |         |           |         |
| Total Conc.: |             | 0.4173            | ng/uL   |           |         |           |         |

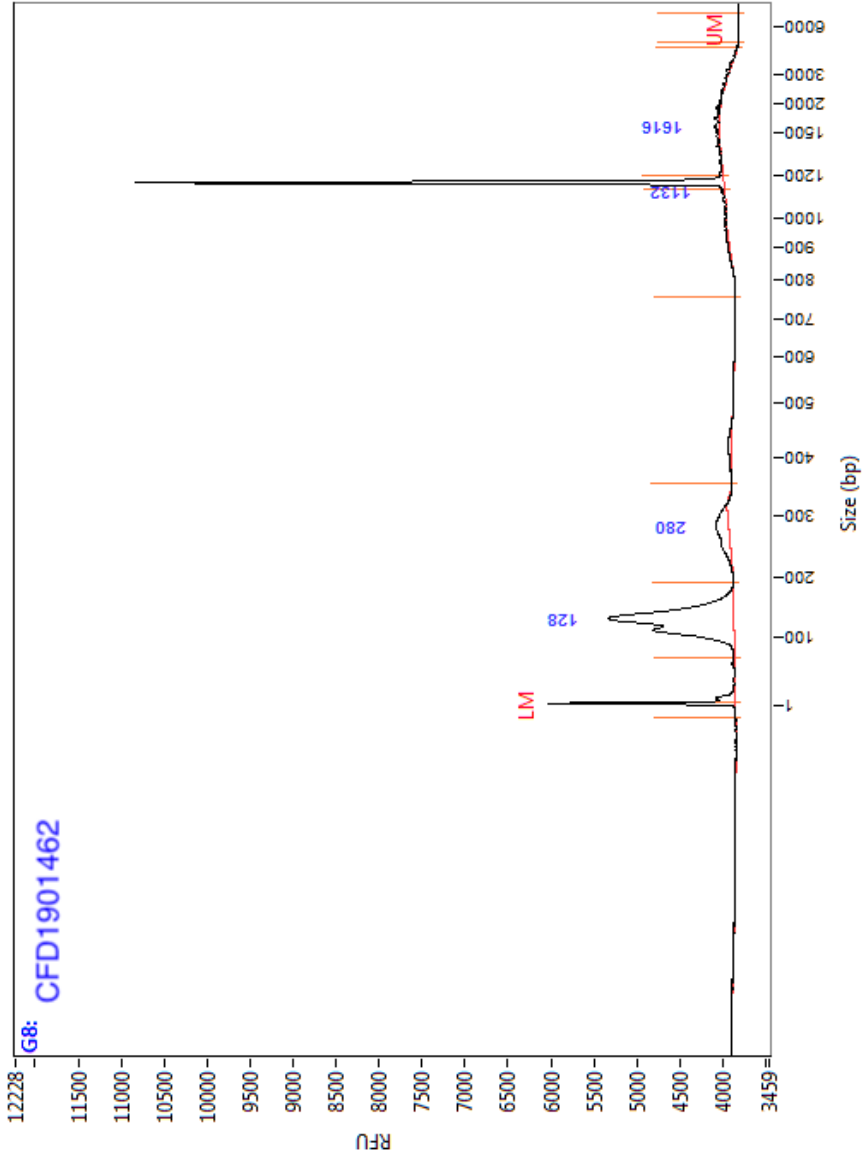

Peak Table

| Size (bp)    | ng/uL       | % (Conc.) (ng/uL) | nmole/L | From (bp) | To (bp) | Avg. Size | CV%    |
|--------------|-------------|-------------------|---------|-----------|---------|-----------|--------|
| 1 (LM)       | 0.0003      |                   | 0.4320  | 0         | 5       | 1         | 226.00 |
| 2            | 0.0185      | 84.4              | 0.2447  | 68        | 191     | 124       | 13.78  |
| 3            | 0.0025      | 11.5              | 0.0153  | 191       | 357     | 269       | 8.80   |
| 4            | 0.0003      | 1.6               | 0.0006  | 756       | 1141    | 980       | 9.95   |
| 5            | 0.0006      | 2.5               | 0.0005  | 1211      | 4849    | 2009      | 42.40  |
| 6            | 0.0000 (UM) |                   | 0.0000  | 5182      | 7022    | 5977      | 6.40   |
| TIC:         |             | 0.0219            | ng/uL   |           |         |           |        |
| TIM:         |             | 0.2610            | nmole/L |           |         |           |        |
| Total Conc.: |             | 0.0289            | ng/uL   |           |         |           |        |

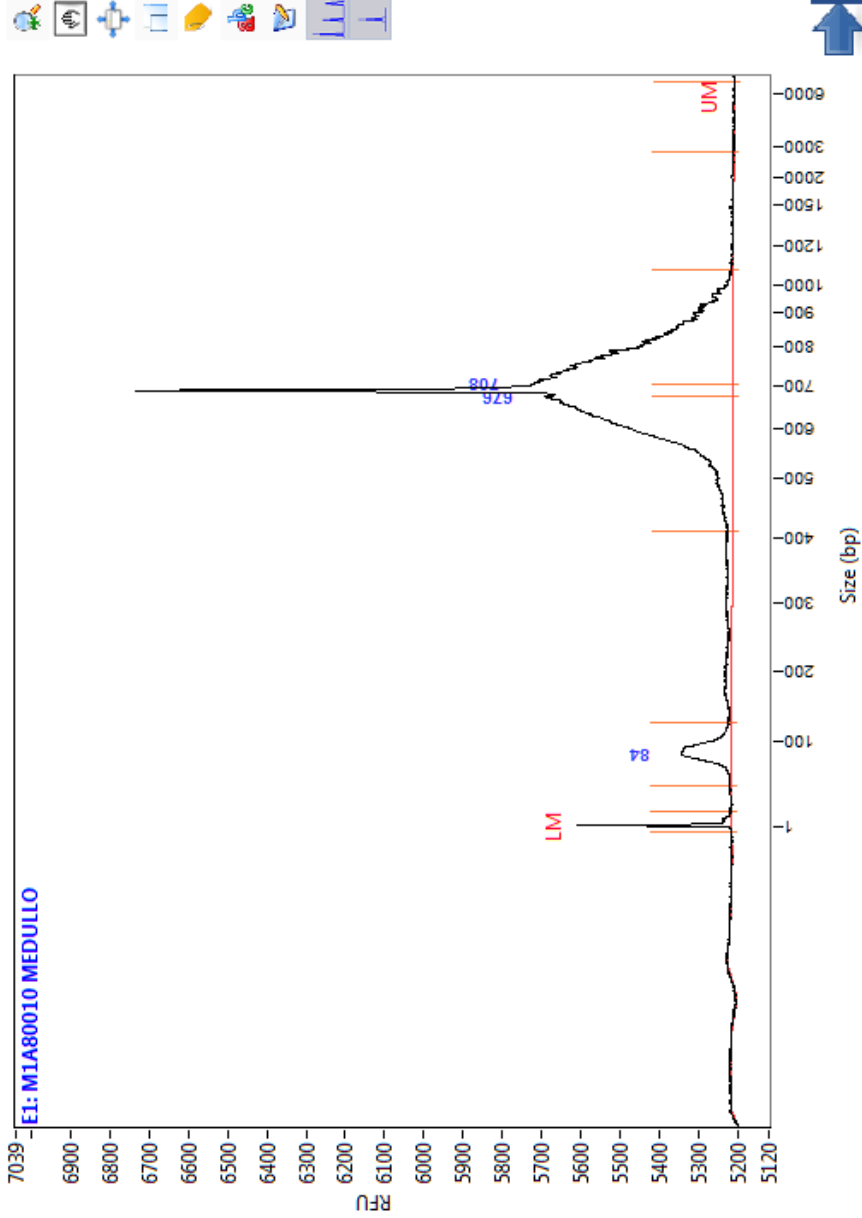

**Peak Table**

| Size (bp)                 | ng/uL       | % (Conc.) (ng/uL) | nmole/L | From (bp) | To (bp) | Avg. Size | CV%    |
|---------------------------|-------------|-------------------|---------|-----------|---------|-----------|--------|
| 1 (LM)                    | 0.0005      |                   | 0.3322  | 0         | 20      | 2         | 161.24 |
| 2                         | 0.0137      | 11.7              | 0.2576  | 49        | 128     | 87        | 13.32  |
| 3                         | 0.0506      | 43.2              | 0.1374  | 411       | 677     | 606       | 9.57   |
| 4                         | 0.0529      | 45.1              | 0.1108  | 707       | 1080    | 785       | 8.47   |
| 5                         | 0.0000 (UM) |                   | 0.0000  | 2898      | 6807    | 5092      | 17.95  |
| TIC: 0.1171 ng/uL         |             |                   |         |           |         |           |        |
| TIM: 0.5058 nmole/L       |             |                   |         |           |         |           |        |
| Total Conc.: 0.1477 ng/uL |             |                   |         |           |         |           |        |
